# Supplementary material
Source: MDPI journal article supplement (https://www.mdpi.com/2075-163X/11/4/379)
Supplement: s1 [file s1]

## Sheet: ANALYSES OR
				DIMENSIONS							MEB Analyzes (WEIGHT %)
PROJECT	SAMPLE	PARTICLE		LENGTH	WIDTH	ECD	TEXTURE	MORPHOLOGY OF PRISTINE GRAINS	ANALYSIS DATE	Fe	Ag	Au	S	Ni	Cu	As	Se	Ru	Rh	Pd	Sn	Sb	Te	Os	Ir	Pt	Hg	Pb	Bi	Total
Nb analysis:	100918			µm	µm	µm2				%	%	%	%	%	%	%	%	%	%	%	%	%	%	%	%	%	%	%	%	%
Compte	Historique			100053	100054	48941				4309	98550	98573	96524	80855	93816	97046	81679	96234	96234	97071	79667	97046	97019	96524	96524	97019	96726	90526	96323	98573
99 Percentile	Historique			183.314	125	125.165				0	42.5186	100	9.86383	1.11082	1.42	39.7887	0	0	0	1.40444	0	0	0	0	0	59.8474	3.59288	0	0	100
Moyenne	Historique			41.2549	27.5771	30.4894				0.000837781	8.49229	81.3309	0.208889	0.0449378	0.0658419	0.661138	0.00977481	0.0265436	0.010492	0.335199	0.0101187	0.04017	0.0324235	0.0586011	0.0466975	1.48	0.117108	0.01221	0.106718	93.0204
Écart-type	Historique			58.8961	40.8873	25.7008				0.0392392	10.4832	28.7331	1.74448	0.285987	0.819758	5.06654	0.440422	0.841307	0.440302	4.44729	0.460802	0.907161	1.07397	1.70449	1.37651	9.43131	1.6745	0.541236	2.16939	25.4804
Maximum	Historique			2230.1	1351.39	1336.01				2.05	100	100	79.7482	25.3367	61.8661	69.5693	47.4455	55.6209	48.671	100	39.0246	51.329	60.0666	90.8338	83.2774	100	100	75.5209	97.3175	100
Minimum	Historique			1.44584	0.92008	2.48841				0	0	0	0	0	0	0	0	0	0	0	0	0	0	0	0	0	0	0	0	0
Compte	Projet			100053	100054	48941				4309	98550	98573	96524	80855	93816	97046	81679	96234	96234	97071	79667	97046	97019	96524	96524	97019	96726	90526	96323	98361
Moyenne	Projet			41.2549	27.5771	30.4894				0.000837781	8.49229	81.3309	0.208889	0.0449378	0.0658419	0.661138	0.00977481	0.0265436	0.010492	0.335199	0.0101187	0.04017	0.0324235	0.0586011	0.0466975	1.48	0.117108	0.01221	0.106718	93.0054
Écart-type	Projet			58.8961	40.8873	25.7008				0.0392392	10.4832	28.7331	1.74448	0.285987	0.819758	5.06654	0.440422	0.841307	0.440302	4.44729	0.460802	0.907161	1.07397	1.70449	1.37651	9.43131	1.6745	0.541236	2.16939	25.5058
Maximum	Projet			2230.1	1351.39	1336.01				2.05	100	100	79.7482	25.3367	61.8661	69.5693	47.4455	55.6209	48.671	100	39.0246	51.329	60.0666	90.8338	83.2774	100	100	75.5209	97.3175	100
Minimum	Projet			1.44584	0.92008	2.48841				0	0	0	0	0	0	0	0	0	0	0	0	0	0	0	0	0	0	0	0	0
966	96620059	1	Alluvions	247	106						2.4	97.6																		100
1279	127920001	1	Alluvions	31.0752	20.3454	24.8529	Intact	Cristallin	2019-01-19		16.7405	83.2595	0	0	0	0	0	0	0	0	0	0	0	0	0	0	0	0	0	100
1279	127920001	2	Alluvions	23.6509	23.1722	23.7678	Remodelé		2019-01-19		5.43816	94.5618	0	0	0	0	0	0	0	0	0	0	0	0	0	0	0	0	0	100
1279	127920001	3	Alluvions	80.2215	77.6029	76.2958	Remodelé				3.33	96.67	0	0	0	0	0	0	0	0	0	0	0	0	0	0	0	0	0	100
1279	127920001	a	Alluvions	60.9127	31.5694	43.0247	PGM		2019-01-19		0	0	0.831605	0	0	42.5926	0	0	0	0	0	0	0	0	0	56.5758	0	0	0	100
1279	127920001	b	Alluvions	22.4868	16.7573	19.2643	PGM		2019-01-19		93.7539	0	6.2461	0	0	0	0	0	0	0	0	0	0	0	0	0	0	0	0	100
1279	127920001	c	Alluvions	37.2507	31.56	33.7018	PGM		2019-01-19		91.9351	0	8.06494	0	0	0	0	0	0	0	0	0	0	0	0	0	0	0	0	100
1279	127920001	d	Alluvions	35.0377	22.9128	27.5958	PGM		2019-01-19		92.0372	0	7.96279	0	0	0	0	0	0	0	0	0	0	0	0	0	0	0	0	100
1279	127920001	e	Alluvions	25.6083	23.9582	24.6699	PGM		2019-01-19		96.8478	0	0.853736	0	0	0	0	0	0	0	0	2.29845	0	0	0	0	0	0	0	100
1279	127920001	f	Alluvions	29.4426	21.2933	24.7578	PGM		2019-01-19		92.9075	0	7.09245	0	0	0	0	0	0	0	0	0	0	0	0	0	0	0	0	100
1279	127920001	g	Alluvions	44.8822	25.1567	32.4381	PGM		2019-01-19		90.8925	0	9.10752	0	0	0	0	0	0	0	0	0	0	0	0	0	0	0	0	100
1279	127920001	h	Alluvions	24.6929	16.9029	19.9087	PGM		2019-01-19		95.5339	0	0	0	0	0	0	0	0	0	0	2.76	0	0	0	0	1.70612	0	0	100
1279	127920001	i	Alluvions	38.9132	37.4937	35.2651	PGM		2019-01-19		95.791	0	1.40195	0	0	0	0	0	0	0	0	2.80702	0	0	0	0	0	0	0	100
1279	127920001	j	Alluvions	28.8717	22.193	24.4154	PGM		2019-01-19		91.6806	0	8.31941	0	0	0	0	0	0	0	0	0	0	0	0	0	0	0	0	100
1279	127920001	k	Alluvions	26.6448	24.6854	25.3172	PGM		2019-01-19		88.2755	0	11.7245	0	0	0	0	0	0	0	0	0	0	0	0	0	0	0	0	100
1279	127920001	l	Alluvions	32.2549	22.3011	26.1227	PGM		2019-01-19		87.8631	0	12.1369	0	0	0	0	0	0	0	0	0	0	0	0	0	0	0	0	100
1279	127920001	m	Alluvions	41.1267	24.1167	30.8534	PGM		2019-01-19		88.6869	0	11.3131	0	0	0	0	0	0	0	0	0	0	0	0	0	0	0	0	100
1279	127920001	n	Alluvions	39.7777	29.2617	34.5418	PGM		2019-01-19		97.6823	0	0	0	0	0	0	0	0	0	0	2.31774	0	0	0	0	0	0	0	100
1279	127920001	o	Alluvions	34.102	27.33	29.8856	PGM		2019-01-19		87.6298	0	12.3702	0	0	0	0	0	0	0	0	0	0	0	0	0	0	0	0	100
1279	127920001	p	Alluvions	40.1989	25.7515	31.7578	PGM		2019-01-19		71.5111	0	13.1732	0	15.3158	0	0	0	0	0	0	0	0	0	0	0	0	0	0	100
1279	127920001	q	Alluvions	37.7625	33.5046	36.2398	PGM		2019-01-19		89.6005	0	10.3995	0	0	0	0	0	0	0	0	0	0	0	0	0	0	0	0	100
1279	127920001	r	Alluvions	26.3389	20.0241	22.3357	PGM		2019-01-19		96.4527	0	1.99919	0	0	0	0	0	0	0	0	1.54814	0	0	0	0	0	0	0	100
1279	127920001	s	Alluvions	32.3582	14.1736	19.6008	PGM		2019-01-19		17.3205	0	26.1559	0	27.1822	0	0	0	0	0	0	29.3414	0	0	0	0	0	0	0	100
1279	127920001	t	Alluvions	40.6228	24.1907	27.792	PGM		2019-01-19		17.2812	0	26.5338	0	26.7896	0	0	0	0	0	0	29.3954	0	0	0	0	0	0	0	100
1279	127920002	a	Alluvions	46.0524	30.102	35.7054	PGM		2019-01-19		91.1088	0	8.89119	0	0	0	0	0	0	0	0	0	0	0	0	0	0	0	0	100
555	55522175	1	Diamicton	118	100				2016-01-15		9.55	90.45																		100
555	55522175	1	Diamicton	11.7	9.85				2016-01-13		7.40343	92.5966																		100
555	55522175	10	Diamicton	19.1	11.6				2016-01-13		0	100																		100
555	55522175	11	Diamicton	19	8.56				2016-01-13		0	100																		100
555	55522175	12	Diamicton	40.2	10.9				2016-01-13		0	100																		100
555	55522175	13	Diamicton	21.7	19.7				2016-01-13		2.95529	97.0447																		100
555	55522175	14	Diamicton	27.1	25.2				2016-01-13		0	100																		100
555	55522175	15	Diamicton	31.8	26.9				2016-01-13		0	100																		100
555	55522175	16	Diamicton	42.6	28.3				2016-01-13		8.11803	91.882																		100
555	55522175	17	Diamicton	26.9	14.6				2016-01-13		14.8579	85.1421																		100
555	55522175	18	Diamicton	53.1	25.9				2016-01-13		0	100																		100
555	55522175	19	Diamicton	38.1	21				2016-01-13		6.60737	93.3926																		100
555	55522175	2	Diamicton	103	71				2016-01-15		8.18	91.82																		100
555	55522175	2	Diamicton	29	19.6				2016-01-13		16.5991	83.4009																		100
555	55522175	20	Diamicton	15.4	12.7				2016-01-13		3.49233	96.5077																		100
555	55522175	21	Diamicton	19.7	16.2				2016-01-13		2.58953	97.4105																		100
555	55522175	22	Diamicton	51.5	24.1				2016-01-13		0	100																		100
555	55522175	23	Diamicton	25.6	25.2				2016-01-13		18.5999	81.4001																		100
555	55522175	24	Diamicton	29.3	19.5				2016-01-13		0	100																		100
555	55522175	25	Diamicton	37.4	20.4				2016-01-13		6.6785	93.3215																		100
555	55522175	26	Diamicton	33	18.7				2016-01-13		6.27447	93.7255																		100
555	55522175	27	Diamicton	33.4	19.5				2016-01-13		11.6165	88.3835																		100
555	55522175	28	Diamicton	39.3	26.6				2016-01-13		31.899	68.101																		100
555	55522175	29	Diamicton	39	26.7				2016-01-13		0	100																		100
555	55522175	3	Diamicton	84.2	44.3				2016-01-15		3.15	96.85																		100
555	55522175	3	Diamicton	19.9	16.3				2016-01-13		0	100																		100
555	55522175	4	Diamicton	96	66.5				2016-01-15		11.44	88.56																		100
555	55522175	4	Diamicton	32.9	24.8				2016-01-13		0	100																		100
555	55522175	5	Diamicton	35.9	35.1				2016-01-13		0	100																		100
555	55522175	6	Diamicton	28.1	20.2				2016-01-13		5.0453	94.9547																		100
555	55522175	7	Diamicton	37	30.1				2016-01-13		0	100																		100
555	55522175	8	Diamicton	27.4	21.8				2016-01-13		12.9691	87.0309																		100
555	55522175	9	Diamicton	22.6	14.3				2016-01-13		16.881	83.119																		100
967	96720036	1	Diamicton	51.1163	30.6491	36.5748	Modifié		2018-02-11		0.562682	99.4373	0	0	0	0	0	0	0	0	0	0	0	0	0	0	0	0	0	100
967	96720036	10	Diamicton	51.7599	34.3447	37.76	Modifié		2018-02-11		2.10278	97.8972	0	0	0	0	0	0	0	0	0	0	0	0	0	0	0	0	0	100
967	96720036	11	Diamicton	39.573	22.9314	28.8054	Modifié		2018-02-11		5.15206	94.8479	0	0	0	0	0	0	0	0	0	0	0	0	0	0	0	0	0	100
967	96720036	12	Diamicton	58.5448	31.6673	39.9982	Modifié		2018-02-11		0	100	0	0	0	0	0	0	0	0	0	0	0	0	0	0	0	0	0	100
967	96720036	13	Diamicton	28.8342	23.9492	24.617	Modifié		2018-02-11		5.82763	94.1724	0	0	0	0	0	0	0	0	0	0	0	0	0	0	0	0	0	100
967	96720036	14	Diamicton	50.9507	21.7462	31.194	Modifié		2018-02-11		2.49023	97.5098	0	0	0	0	0	0	0	0	0	0	0	0	0	0	0	0	0	100
967	96720036	15	Diamicton	55.7922	27.5699	37.0117	Modifié		2018-02-11		0.837373	99.1626	0	0	0	0	0	0	0	0	0	0	0	0	0	0	0	0	0	100
967	96720036	16	Diamicton	51.387	22.4395	29.9585	Modifié		2018-02-11		0	100	0	0	0	0	0	0	0	0	0	0	0	0	0	0	0	0	0	100
967	96720036	17	Diamicton	19.0022	9.86575	14.227	PGM		2018-02-11		0	0	0.809498	0	0	41.0787	0	0	0	0	0	0	0	0	0	58.1118	0	0	0	100
967	96720036	18	Diamicton	17.4493	16.2168	16.6181	PGM		2018-02-11		0	0	11.2736	0	0	30.4799	0	9.58997	9.83804	0	0	0	0	2.90939	4.13442	31.7747	0	0	0	100
967	96720036	19	Diamicton	26.5486	17.4617	21.0611	PGM		2018-02-11		0	0	0	0	0	48.5969	0	9.76799	0	0	0	0	0	41.6351	0	0	0	0	0	100
967	96720036	2	Diamicton	37.0325	29.1557	32.279	Remodelé		2018-02-11		3.67766	96.3223	0	0	0	0	0	0	0	0	0	0	0	0	0	0	0	0	0	100
967	96720036	3	Diamicton	41.7529	20.389	27.0139	Intact	Intergranulaire	2018-02-11		1.77589	98.2241	0	0	0	0	0	0	0	0	0	0	0	0	0	0	0	0	0	100
967	96720036	4	Diamicton	19.1785	12.8489	14.9874	Modifié		2018-02-11		18.6859	81.3141	0	0	0	0	0	0	0	0	0	0	0	0	0	0	0	0	0	100
967	96720036	5	Diamicton	50.5046	41.2763	42.0845	Modifié		2018-02-11		1.51015	98.4899	0	0	0	0	0	0	0	0	0	0	0	0	0	0	0	0	0	100
967	96720036	6	Diamicton	25.7391	22.3523	23.1722	Modifié		2018-02-11		2.97929	97.0207	0	0	0	0	0	0	0	0	0	0	0	0	0	0	0	0	0	100
967	96720036	7	Diamicton	30.7795	24.3306	24.3944	Intact	Remobilisé	2018-02-11		1.0789	98.9211	0	0	0	0	0	0	0	0	0	0	0	0	0	0	0	0	0	100
967	96720036	8	Diamicton	38.919	29.9735	30.8852	Modifié		2018-02-11		5.88045	94.1195	0	0	0	0	0	0	0	0	0	0	0	0	0	0	0	0	0	100
967	96720036	9	Diamicton	39.0077	18.7249	23.6976	Intact	Remobilisé	2018-02-11		2.37986	97.6201	0	0	0	0	0	0	0	0	0	0	0	0	0	0	0	0	0	100
967	96720037	1	Diamicton	33.8105	31.6569	31.3927	Modifié		2018-02-11		0	98.9916	0	0	0	0	0	0	0	0	0	0	0	0	0	1.00842	0	0	0	100
967	96720037	10	Diamicton	30.2726	16.4001	20.7133	Modifié		2018-02-11		14.4724	85.5276	0	0	0	0	0	0	0	0	0	0	0	0	0	0	0	0	0	100
967	96720037	11	Diamicton	16.6214	11.7373	13.7529	Intact	Mutuel	2018-02-11		2.10349	97.8965	0	0	0	0	0	0	0	0	0	0	0	0	0	0	0	0	0	100
967	96720037	12	Diamicton	13.5988	13.0875	13.5843	Intact	Cristallin	2018-02-11		7.99355	92.0064	0	0	0	0	0	0	0	0	0	0	0	0	0	0	0	0	0	100
967	96720037	13	Diamicton	44.0934	24.6922	30.8707	Modifié		2018-02-11		13.7339	86.2661	0	0	0	0	0	0	0	0	0	0	0	0	0	0	0	0	0	100
967	96720037	14	Diamicton	23.9577	18.6005	19.819	Modifié		2018-02-11		10.7444	89.2556	0	0	0	0	0	0	0	0	0	0	0	0	0	0	0	0	0	100
967	96720037	15	Diamicton	26.1206	23.0094	23.841	Remodelé		2018-02-11		11.0838	88.9162	0	0	0	0	0	0	0	0	0	0	0	0	0	0	0	0	0	100
967	96720037	16	Diamicton	26.3106	16.4182	19.4277	Modifié		2018-02-11		0	100	0	0	0	0	0	0	0	0	0	0	0	0	0	0	0	0	0	100
967	96720037	17	Diamicton	42.7797	29.3476	33.8973	Remodelé		2018-02-11		3.5478	96.4522	0	0	0	0	0	0	0	0	0	0	0	0	0	0	0	0	0	100
967	96720037	18	Diamicton	24.7935	18.5042	20.9041	Modifié		2018-02-11		5.35968	94.6403	0	0	0	0	0	0	0	0	0	0	0	0	0	0	0	0	0	100
967	96720037	19	Diamicton	24.1424	17.3791	19.1213	Modifié		2018-02-11		22.7013	77.2987	0	0	0	0	0	0	0	0	0	0	0	0	0	0	0	0	0	100
967	96720037	2	Diamicton	20.3218	20.1887	19.8181	Modifié		2018-02-11		7.09017	92.9098	0	0	0	0	0	0	0	0	0	0	0	0	0	0	0	0	0	100
967	96720037	20	Diamicton	22.4999	15.3427	18.7246	Modifié		2018-02-11		1.94397	98.056	0	0	0	0	0	0	0	0	0	0	0	0	0	0	0	0	0	100
967	96720037	21	Diamicton	14.9049	10.1443	12.2931	Modifié		2018-02-11		0.851999	99.148	0	0	0	0	0	0	0	0	0	0	0	0	0	0	0	0	0	100
967	96720037	22	Diamicton	17.8994	9.62409	12.5148	Intact	Intergranulaire	2018-02-11		4.98616	95.0138	0	0	0	0	0	0	0	0	0	0	0	0	0	0	0	0	0	100
967	96720037	23	Diamicton	34.4973	21.5578	27.2652	Remodelé		2018-02-11		8.48017	91.5198	0	0	0	0	0	0	0	0	0	0	0	0	0	0	0	0	0	100
967	96720037	24	Diamicton	20.1103	13.5383	16.0392	Intact	Cristallin	2018-02-11		16.2022	83.7978	0	0	0	0	0	0	0	0	0	0	0	0	0	0	0	0	0	100
967	96720037	25	Diamicton	31.8527	27.7253	28.7203	Modifié		2018-02-11		1.51885	98.4811	0	0	0	0	0	0	0	0	0	0	0	0	0	0	0	0	0	100
967	96720037	26	Diamicton	26.7448	12.8381	17.2635	Modifié		2018-02-11		5.30462	94.6954	0	0	0	0	0	0	0	0	0	0	0	0	0	0	0	0	0	100
967	96720037	27	Diamicton	27.0282	14.9676	19.3506	Intact	Cristallin	2018-02-11		9.6725	90.3275	0	0	0	0	0	0	0	0	0	0	0	0	0	0	0	0	0	100
967	96720037	28	Diamicton	13.2754	12.7497	13.0567	Intact	Cristallin	2018-02-11		21.0586	78.9414	0	0	0	0	0	0	0	0	0	0	0	0	0	0	0	0	0	100
967	96720037	29	Diamicton	29.4421	27.3561	27.1474	Modifié		2018-02-11		9.51319	90.4868	0	0	0	0	0	0	0	0	0	0	0	0	0	0	0	0	0	100
967	96720037	3	Diamicton	35.8258	27.2845	29.2126	Modifié		2018-02-11		4.00426	95.9957	0	0	0	0	0	0	0	0	0	0	0	0	0	0	0	0	0	100
967	96720037	30	Diamicton	34.8035	17.6736	23.1056	Modifié		2018-02-11		2.7056	97.2944	0	0	0	0	0	0	0	0	0	0	0	0	0	0	0	0	0	100
967	96720037	31	Diamicton	32.2786	30.7774	30.771	Modifié		2018-02-11		3.12285	96.8771	0	0	0	0	0	0	0	0	0	0	0	0	0	0	0	0	0	100
967	96720037	32	Diamicton	20.7683	19.0034	19.4328	Modifié		2018-02-11		2.10612	97.8939	0	0	0	0	0	0	0	0	0	0	0	0	0	0	0	0	0	100
967	96720037	33	Diamicton	35.4699	30.6272	32.042	Modifié		2018-02-11		4.37735	95.6227	0	0	0	0	0	0	0	0	0	0	0	0	0	0	0	0	0	100
967	96720037	34	Diamicton	25.9201	7.98291	14.2177	Intact	Intergranulaire	2018-02-11		37.4196	62.5804	0	0	0	0	0	0	0	0	0	0	0	0	0	0	0	0	0	100
967	96720037	35	Diamicton	27.4344	26.0187	25.3185	Modifié		2018-02-11		0	100	0	0	0	0	0	0	0	0	0	0	0	0	0	0	0	0	0	100
967	96720037	36	Diamicton	41.3421	13.68	22.7615	Modifié		2018-02-11		11.2606	88.7394	0	0	0	0	0	0	0	0	0	0	0	0	0	0	0	0	0	100
967	96720037	37	Diamicton	31.094	18.8695	22.8334	Modifié		2018-02-11		7.69403	92.306	0	0	0	0	0	0	0	0	0	0	0	0	0	0	0	0	0	100
967	96720037	38	Diamicton	14.2587	8.49948	10.4711	Intact	Intergranulaire	2018-02-11		21.1721	78.8279	0	0	0	0	0	0	0	0	0	0	0	0	0	0	0	0	0	100
967	96720037	39	Diamicton	23.4631	19.6227	20.1407	Modifié		2018-02-11		4.70484	95.2952	0	0	0	0	0	0	0	0	0	0	0	0	0	0	0	0	0	100
967	96720037	4	Diamicton	32.2149	20.7471	22.5176	Modifié		2018-02-11		1.07339	98.9266	0	0	0	0	0	0	0	0	0	0	0	0	0	0	0	0	0	100
967	96720037	40	Diamicton	38.7168	30.1075	34.5429	Modifié		2018-02-11		8.85975	91.1402	0	0	0	0	0	0	0	0	0	0	0	0	0	0	0	0	0	100
967	96720037	41	Diamicton	47.7256	36.7951	40.1997	Modifié		2018-02-11		1.60649	98.3935	0	0	0	0	0	0	0	0	0	0	0	0	0	0	0	0	0	100
967	96720037	42	Diamicton	65.0066	40.4914	49.1211	Remodelé		2018-02-11		2.36109	97.6389	0	0	0	0	0	0	0	0	0	0	0	0	0	0	0	0	0	100
967	96720037	43	Diamicton	32.1185	8.62659	14.0918	Modifié		2018-06-26		6.2786	93.7214	0	0	0	0	0	0	0	0	0	0	0	0	0	0	0	0	0	100
967	96720037	44	Diamicton	24.4211	18.1491	20.8362	Modifié		2018-06-26		7.26101	92.163	0	0.576003	0	0	0	0	0	0	0	0	0	0	0	0	0	0	0	100
967	96720037	45	Diamicton	18.0131	16.5257	16.9539	Intact	Cristallin	2018-06-26		12.4144	87.5856	0	0	0	0	0	0	0	0	0	0	0	0	0	0	0	0	0	100
967	96720037	46	Diamicton	29.3038	21.4857	23.6029	Modifié		2018-06-26		7.58193	91.5287	0	0.889364	0	0	0	0	0	0	0	0	0	0	0	0	0	0	0	100
967	96720037	47	Diamicton	30.6675	23.5585	26.5927	Remodelé		2018-06-26		2.98816	96.0918	0	0.919999	0	0	0	0	0	0	0	0	0	0	0	0	0	0	0	100
967	96720037	48	Diamicton	27.1194	22.2526	22.7456	Modifié		2018-06-26		24.4462	74.5437	0	1.01017	0	0	0	0	0	0	0	0	0	0	0	0	0	0	0	100
967	96720037	49	Diamicton	21.551	13.8576	16.9799	Intact	Cristallin	2018-06-26		20.7556	77.9982	0	1.24624	0	0	0	0	0	0	0	0	0	0	0	0	0	0	0	100
967	96720037	5	Diamicton	37.6093	30.1712	31.577	Modifié		2018-02-11		8.24674	91.7533	0	0	0	0	0	0	0	0	0	0	0	0	0	0	0	0	0	100
967	96720037	50	Diamicton	12.4279	11.3888	12.1554	PGM		2018-02-11		0	0	0	0	0	41.2979	0	0	0	0	0	0	0	0	0	58.7021	0	0	0	100
967	96720037	51	Diamicton	16.6103	15.202	15.9557	PGM		2018-02-11		0	0	0	0	0	41.9731	0	0	0	0	0	0	0	0	0	58.0269	0	0	0	100
967	96720037	52	Diamicton	19.5814	19.2134	19.2469	PGM		2018-02-11		0	0	0	0	0	41.9611	0	0	0	0	0	0	0	0	0	58.0389	0	0	0	100
967	96720037	53	Diamicton	23.6957	23.1853	23.5656	PGM		2018-02-11		0	0	0.932593	0	0	40.9688	0	0	0	0	0	0	0	0	0	58.0986	0	0	0	100
967	96720037	6	Diamicton	18.119	17.0678	17.367	Intact	Cristallin	2018-02-11		12.2098	87.7902	0	0	0	0	0	0	0	0	0	0	0	0	0	0	0	0	0	100
967	96720037	7	Diamicton	19.6443	10.5938	13.7828	Intact	Mutuel	2018-02-11		17.9988	82.0012	0	0	0	0	0	0	0	0	0	0	0	0	0	0	0	0	0	100
967	96720037	8	Diamicton	30.8872	29.25	28.5565	Intact	Remobilisé	2018-02-11		1.81811	98.1819	0	0	0	0	0	0	0	0	0	0	0	0	0	0	0	0	0	100
967	96720037	9	Diamicton	35.8001	18.3661	24.3565	Modifié		2018-02-11		5.2663	94.7337	0	0	0	0	0	0	0	0	0	0	0	0	0	0	0	0	0	100
967	96720237	1	Diamicton	49.2365	34.2015	38.5494	Modifié		2018-05-28		5.89558	94.1044	0	0	0	0	0	0	0	0	0	0	0	0	0	0	0	0	0	100
967	96720237	10	Diamicton	21.4135	19.9863	18.6472	Intact	Intergranulaire	2018-05-28		13.7027	86.2973	0	0	0	0	0	0	0	0	0	0	0	0	0	0	0	0	0	100
967	96720237	11	Diamicton	59.7613	51.02	51.1295	Modifié		2018-05-28		1.36924	98.6308	0	0	0	0	0	0	0	0	0	0	0	0	0	0	0	0	0	100
967	96720237	12	Diamicton	15.497	12.8738	13.38	Intact	Mutuel	2018-05-28		32.4882	67.5118	0	0	0	0	0	0	0	0	0	0	0	0	0	0	0	0	0	100
967	96720237	2	Diamicton	30.729	24.328	26.7766	Modifié		2018-05-28		2.25001	97.75	0	0	0	0	0	0	0	0	0	0	0	0	0	0	0	0	0	100
967	96720237	3	Diamicton	28.5223	19.1671	21.6914	Modifié		2018-05-28		2.89726	97.1027	0	0	0	0	0	0	0	0	0	0	0	0	0	0	0	0	0	100
967	96720237	4	Diamicton	66.6569	23.742	37.2893	Modifié		2018-05-28		0	100	0	0	0	0	0	0	0	0	0	0	0	0	0	0	0	0	0	100
967	96720237	5	Diamicton	67.093	33.4151	39.4865	Intact	Remobilisé	2018-05-28		4.30064	95.6994	0	0	0	0	0	0	0	0	0	0	0	0	0	0	0	0	0	100
967	96720237	6	Diamicton	40.5	32.5295	33.2292	Modifié		2018-05-28		7.66553	92.3345	0	0	0	0	0	0	0	0	0	0	0	0	0	0	0	0	0	100
967	96720237	7	Diamicton	18.1677	18.1566	17.251	Modifié		2018-05-28		43.7097	56.2903	0	0	0	0	0	0	0	0	0	0	0	0	0	0	0	0	0	100
967	96720237	8	Diamicton	31.6621	28.4802	28.522	Modifié		2018-05-28		9.13081	90.8692	0	0	0	0	0	0	0	0	0	0	0	0	0	0	0	0	0	100
967	96720237	9	Diamicton	33.4216	30.7298	29.0739	Intact	Remobilisé	2018-05-28		1.65263	98.3474	0	0	0	0	0	0	0	0	0	0	0	0	0	0	0	0	0	100
967	96720319	1	Diamicton	39.7742	19.6253	27.9815	Intact	Remobilisé	2018-06-14		6.63451	93.3655	0	0	0	0	0	0	0	0	0	0	0	0	0	0	0	0	0	100
967	96720319	2	Diamicton	46.2685	29.2858	35.7018	Intact	Mutuel	2018-06-14		0	100	0	0	0	0	0	0	0	0	0	0	0	0	0	0	0	0	0	100
967	96720319	3	Diamicton	44.9243	35.1821	39.8986	Intact	Mutuel	2018-06-14		7.74982	92.2502	0	0	0	0	0	0	0	0	0	0	0	0	0	0	0	0	0	100
967	96720319	4	Diamicton	43.0081	36.2119	38.8352	Remodelé		2018-06-14		0	100	0	0	0	0	0	0	0	0	0	0	0	0	0	0	0	0	0	100
967	96720319	5	Diamicton	54.9199	25.8971	36.5308	Modifié		2018-06-14		4.62903	95.371	0	0	0	0	0	0	0	0	0	0	0	0	0	0	0	0	0	100
967	96720319	6	Diamicton	76.7209	46.2719	54.3923	Modifié		2018-06-14		4.62322	95.3768	0	0	0	0	0	0	0	0	0	0	0	0	0	0	0	0	0	100
967	96720319	7	Diamicton	97.2931	58.2662	66.8092	Modifié		2018-07-23		15.0373	84.9627	0	0	0	0	0	0	0	0	0	0	0	0	0	0	0	0	0	100
1154	115420085	1	Diamicton	32.804	28.5819		Intact	Remobilisé	2017-01-19		2.72727	97.2727	0	0	0	0	0	0	0	0		0	0	0	0	0	0		0	100
1154	115420085	2	Diamicton	27.1426	19.6721		Intact	Remobilisé	2017-01-19		1.2474	98.7526	0	0	0	0	0	0	0	0		0	0	0	0	0	0		0	100
1154	115420085	3	Diamicton	13.7082	13.6968		Intact	Mutuel	2017-01-19		3.30861	96.6914	0	0	0	0	0	0	0	0		0	0	0	0	0	0		0	100
1154	115420093	1	Diamicton	32.7286	26.1566		Modifié		2017-01-20		11.4716	88.5284	0	0	0	0	0	0	0	0		0	0	0	0	0	0		0	100
1154	115420093	2	Diamicton	56.7834	29.2125		Modifié		2017-01-20		8.89232	91.1077	0	0	0	0	0	0	0	0		0	0	0	0	0	0		0	100
1154	115420093	3	Diamicton	44.7035	29.1394		Intact	Remobilisé	2017-01-20		1.2109	98.7891	0	0	0	0	0	0	0	0		0	0	0	0	0	0		0	100
1154	115420093	4	Diamicton	56.4922	32.4794		Remodelé		2017-01-20		1.36428	98.6357	0	0	0	0	0	0	0	0		0	0	0	0	0	0		0	100
1154	115420093	5	Diamicton	53.0723	29.7287		Intact	Remobilisé	2017-01-20		7.11224	92.8878	0	0	0	0	0	0	0	0		0	0	0	0	0	0		0	100
1154	115420093	6	Diamicton	26.9058	20.5598		PGM		2017-01-20		0	0	0	0	0	38.4753	0	0	1.55329	0		0	0	0	0	59.9714	0		0	100
1154	115420093	7	Diamicton	28.2079	20.4231		PGM		2017-01-20		0	0	0.786782	0	0	39.2762	0	0	0	0		0	0	0	0	59.9371	0		0	100
1154	115420198	1	Diamicton	22.0836	12.8833		Modifié		2016-10-31		1.84827	98.1517	0	0	0	0	0	0	0	0		0	0	0	0	0	0		0	100
1154	115420198	2	Diamicton	35.687	15.0189		Intact	Intergranulaire	2016-10-31		7.3791	92.6209	0	0	0	0	0	0	0	0		0	0	0	0	0	0		0	100
1154	115420198	3	Diamicton	26.2672	20.8814		Modifié		2016-10-31		9.73548	90.2645	0	0	0	0	0	0	0	0		0	0	0	0	0	0		0	100
1154	115420198	4	Diamicton	15.2703	10.3298		Intact	Intergranulaire	2016-10-31		7.7321	92.2679	0	0	0	0	0	0	0	0		0	0	0	0	0	0		0	100
1154	115420198	5	Diamicton	66.0757	30.7406		Intact	Intergranulaire	2017-01-25		8.59226	91.4077	0	0	0	0	0	0	0	0		0	0	0	0	0	0		0	100
1154	115420198	6	Diamicton	22.5635	19.4871		Intact	Cristallin	2017-01-25		11.4939	88.5061	0	0	0	0	0	0	0	0		0	0	0	0	0	0		0	100
1154	115420198	7	Diamicton	19.4821	9.59288		PGM		2016-10-31		0	0	0	0	0	40.1295	0	0	0	0		0	0	0	0	59.8705	0		0	100
1154	115420258	1	Diamicton	88.4237	82.7626		Remodelé		2016-12-01		4.84	95.16	0	0	0	0	0	0	0	0		0	0	0	0	0	0		0	100
1154	115420258	2	Diamicton	53.1598	36.7478		Modifié		2016-11-25		1.77089	98.2291	0	0	0	0	0	0	0	0		0	0	0	0	0	0		0	100
1154	115420258	3	Diamicton	17.5797	15.8841		PGM		2016-11-25		22.054	0	0	0	0	0	27.7441	0	0	50.2019		0	0	0	0	0	0		0	100
1154	115420302	1	Diamicton	102.784	99.026		Remodelé		2016-12-14		18.14	81.86	0	0	0	0	0	0	0	0		0	0	0	0	0	0		0	100
1154	115420302	2	Diamicton	104.032	99.6199		Remodelé		2016-12-14		0	100	0	0	0	0	0	0	0	0		0	0	0	0	0	0		0	100
1214	121420155	1	Diamicton	36.6068	33.3748		Modifié		2018-03-14		3.2904	96.7096	0	0	0	0	0	0	0	0	0	0	0	0	0	0	0	0	0	100
1214	121420155	10	Diamicton	59.7267	18.8992		Intact	Remobilisé	2018-03-14		4.14181	95.8582	0	0	0	0	0	0	0	0	0	0	0	0	0	0	0	0	0	100
1214	121420155	11	Diamicton	66.4014	42.1524		Modifié		2018-03-14		5.66492	94.3351	0	0	0	0	0	0	0	0	0	0	0	0	0	0	0	0	0	100
1214	121420155	12	Diamicton	85.9319	55.6301		Modifié		2018-06-01		7.82	92.18			0															100
1214	121420155	2	Diamicton	45.918	26.6178		Remodelé		2018-03-14		10.1777	89.8223	0	0	0	0	0	0	0	0	0	0	0	0	0	0	0	0	0	100
1214	121420155	3	Diamicton	27.3319	15.1035		Intact	Remobilisé	2018-03-14		8.28714	91.7129	0	0	0	0	0	0	0	0	0	0	0	0	0	0	0	0	0	100
1214	121420155	4	Diamicton	31.2561	14.7611		Intact	Remobilisé	2018-03-14		14.7048	85.2952	0	0	0	0	0	0	0	0	0	0	0	0	0	0	0	0	0	100
1214	121420155	5	Diamicton	28.5467	17.999		Intact	Remobilisé	2018-03-14		3.26808	94.523	0	0	0	0	0	0	0	0	0	0	0	0	0	2.20891	0	0	0	100
1214	121420155	6	Diamicton	28.9415	23.7201		Modifié		2018-03-14		0	100	0	0	0	0	0	0	0	0	0	0	0	0	0	0	0	0	0	100
1214	121420155	7	Diamicton	63.9499	42.2096		Modifié		2018-03-14		2.58161	97.4184	0	0	0	0	0	0	0	0	0	0	0	0	0	0	0	0	0	100
1214	121420155	8	Diamicton	55.1687	37.2346		Modifié		2018-03-14		0	100	0	0	0	0	0	0	0	0	0	0	0	0	0	0	0	0	0	100
1214	121420155	9	Diamicton	34.443	26.1641		Modifié		2018-03-14		6.4473	93.5527	0	0	0	0	0	0	0	0	0	0	0	0	0	0	0	0	0	100
1214	121420180	1	Diamicton	52.1179	34.8513		Modifié		2018-03-19		10.7221	88.6405	0	0	0.637475	0	0	0	0	0	0	0	0	0	0	0	0	0	0	100
1214	121420180	2	Diamicton	38.6094	27.3783		Remodelé		2018-03-19		2.49805	96.8156	0	0	0.686339	0	0	0	0	0	0	0	0	0	0	0	0	0	0	100
1214	121420180	3	Diamicton	10.524	9.95462		Intact	Mutuel	2018-03-19		3.03844	94.1137	0	0	0	0	0	0	0	0	0	0	0	0	0	2.84788	0	0	0	100
1214	121420180	4	Diamicton	37.6951	33.1011		Modifié		2018-03-19		11.5502	88.4498	0	0	0	0	0	0	0	0	0	0	0	0	0	0	0	0	0	100
1214	121420180	5	Diamicton	23.6348	15.6849		Intact	Remobilisé	2018-03-19		13.2818	86.7182	0	0	0	0	0	0	0	0	0	0	0	0	0	0	0	0	0	100
1214	121420371	1	Diamicton	15.2534	14.3284		Intact	Mutual	2018-09-11		8.02412	91.9759	0	0	0	0	0	0	0	0	0	0	0	0	0	0	0	0	0	100
1214	121420371	10	Diamicton	49.3964	30.3027		Intact	Remobilized	2018-09-11		3.03327	96.9667	0	0	0	0	0	0	0	0	0	0	0	0	0	0	0	0	0	100
1214	121420371	11	Diamicton	14.2113	12.4564		Intact	Crystalline	2018-09-11		6.68694	93.3131	0	0	0	0	0	0	0	0	0	0	0	0	0	0	0	0	0	100
1214	121420371	12	Diamicton	43.5293	40.2951		Intact	Intergranular	2018-09-11		9.81347	89.3825	0	0	0.804019	0	0	0	0	0	0	0	0	0	0	0	0	0	0	100
1214	121420371	13	Diamicton	52.5158	36.9056		Intact	Remobilized	2018-09-11		1.74233	98.2577	0	0	0	0	0	0	0	0	0	0	0	0	0	0	0	0	0	100
1214	121420371	14	Diamicton	49.3355	27.8183		Intact	Intergranular	2018-09-11		11.0335	88.9665	0	0	0	0	0	0	0	0	0	0	0	0	0	0	0	0	0	100
1214	121420371	15	Diamicton	25.277	13.789		Intact	Remobilized	2018-09-11		21.1505	78.8495	0	0	0	0	0	0	0	0	0	0	0	0	0	0	0	0	0	100
1214	121420371	16	Diamicton	40.1889	22.6871		Intact	Intergranular	2018-09-11		2.26803	97.732	0	0	0	0	0	0	0	0	0	0	0	0	0	0	0	0	0	100
1214	121420371	17	Diamicton	14.1513	7.83767		Intact	Mutual	2018-09-11		7.34248	92.6575	0	0	0	0	0	0	0	0	0	0	0	0	0	0	0	0	0	100
1214	121420371	18	Diamicton	22.3433	19.3094		Intact	Mutual	2018-09-11		3.77514	96.2249	0	0	0	0	0	0	0	0	0	0	0	0	0	0	0	0	0	100
1214	121420371	19	Diamicton	24.0898	14.6035		Intact	Intergranular	2018-09-11		1.61359	98.3864	0	0	0	0	0	0	0	0	0	0	0	0	0	0	0	0	0	100
1214	121420371	2	Diamicton	32.915	26.2521		Intact	Remobilized	2018-09-11		4.90454	95.0955	0	0	0	0	0	0	0	0	0	0	0	0	0	0	0	0	0	100
1214	121420371	20	Diamicton	28.8236	18.4531		Intact	Intergranular	2018-09-11		6.87251	93.1275	0	0	0	0	0	0	0	0	0	0	0	0	0	0	0	0	0	100
1214	121420371	21	Diamicton	33.9355	13.1811		Intact	Remobilized	2018-09-11		4.90527	95.0947	0	0	0	0	0	0	0	0	0	0	0	0	0	0	0	0	0	100
1214	121420371	22	Diamicton	43.9218	19.637		Intact	Intergranular	2018-09-11		3.69865	96.3014	0	0	0	0	0	0	0	0	0	0	0	0	0	0	0	0	0	100
1214	121420371	23	Diamicton	34.0124	27.9811		Intact	Crystalline	2018-09-11		14.8275	85.1725	0	0	0	0	0	0	0	0	0	0	0	0	0	0	0	0	0	100
1214	121420371	24	Diamicton	38.8524	33.6146		Modified		2018-09-11		14.6943	85.3057	0	0	0	0	0	0	0	0	0	0	0	0	0	0	0	0	0	100
1214	121420371	25	Diamicton	33.419	28.2201		Modified		2018-09-11		2.5288	97.4712	0	0	0	0	0	0	0	0	0	0	0	0	0	0	0	0	0	100
1214	121420371	26	Diamicton	46.2595	35.323		Intact	Intergranular	2018-09-11		4.10649	95.8935	0	0	0	0	0	0	0	0	0	0	0	0	0	0	0	0	0	100
1214	121420371	27	Diamicton	45.9745	35.7211		Intact	Remobilized	2018-09-18		1.58631	91.6023	0	0	0	0	0	0	0	0	0	0	0	0	0	6.81134	0	0	0	100
1214	121420371	28	Diamicton	24.2543	12.3936		Intact	Crystalline	2018-09-18		7.00832	92.1577	0	0.833961	0	0	0	0	0	0	0	0	0	0	0	0	0	0	0	100
1214	121420371	29	Diamicton	57.9423	51.2495		Intact	Intergranular	2018-09-19		0	100	0	0	0	0	0	0	0	0	0	0	0	0	0	0	0	0	0	100
1214	121420371	3	Diamicton	37.9621	33.913		Intact	Intergranular	2018-09-11		3.07586	96.9241	0	0	0	0	0	0	0	0	0	0	0	0	0	0	0	0	0	100
1214	121420371	30	Diamicton	131.259	104.804		Modified		2018-09-19		2.43004	97.57	0	0	0	0	0	0	0	0	0	0	0	0	0	0	0	0	0	100
1214	121420371	4	Diamicton	36.2881	18.9346		Intact	Intergranular	2018-09-11		2.10821	97.8918	0	0	0	0	0	0	0	0	0	0	0	0	0	0	0	0	0	100
1214	121420371	5	Diamicton	43.309	24.3108		Modified		2018-09-11		4.02823	95.9718	0	0	0	0	0	0	0	0	0	0	0	0	0	0	0	0	0	100
1214	121420371	6	Diamicton	31.3431	7.55142		Intact	Mutual	2018-09-11		8.29774	91.7023	0	0	0	0	0	0	0	0	0	0	0	0	0	0	0	0	0	100
1214	121420371	7	Diamicton	21.0298	13.0338		Intact	Intergranular	2018-09-11		0	100	0	0	0	0	0	0	0	0	0	0	0	0	0	0	0	0	0	100
1214	121420371	8	Diamicton	40.0365	16.1497		Intact	Intergranular	2018-09-11		2.96568	97.0343	0	0	0	0	0	0	0	0	0	0	0	0	0	0	0	0	0	100
1214	121420371	9	Diamicton	28.6108	19.9579		Intact	Mutual	2018-09-11		4.62026	95.3797	0	0	0	0	0	0	0	0	0	0	0	0	0	0	0	0	0	100
1227	122720014	1	Diamicton	17.3501	15.247		Intact	Remobilisé	2017-12-19		0	99.5219	0	0	0.478099	0	0	0	0	0	0	0	0	0	0	0	0	0	0	100
1227	122720014	2	Diamicton	18.1084	11.0617		Intact	Intergranulaire	2017-12-19		0	100	0	0	0	0	0	0	0	0	0	0	0	0	0	0	0	0	0	100
1227	122720014	3	Diamicton	42.189	27.8816		Intact	Intergranulaire	2017-12-19		3.88958	96.1104	0	0	0	0	0	0	0	0	0	0	0	0	0	0	0	0	0	100
1227	122720016	1	Diamicton	36.6719	26.932		Remodelé		2017-12-19		8.64554	91.3545	0	0	0	0	0	0	0	0	0	0	0	0	0	0	0	0	0	100
1227	122720016	2	Diamicton	64.973	16.7415		Modifié		2017-12-19		7.80867	92.1913	0	0	0	0	0	0	0	0	0	0	0	0	0	0	0	0	0	100
1227	122720016	3	Diamicton	38.5515	34.24		Modifié		2017-12-19		2.62213	97.3779	0	0	0	0	0	0	0	0	0	0	0	0	0	0	0	0	0	100
1227	122720016	4	Diamicton	31.5358	14.5036		Intact	Remobilisé	2017-12-19		6.10431	93.8957	0	0	0	0	0	0	0	0	0	0	0	0	0	0	0	0	0	100
1227	122720016	5	Diamicton	20.1542	12.0227		Modifié		2017-12-19		7.4545	92.5455	0	0	0	0	0	0	0	0	0	0	0	0	0	0	0	0	0	100
1227	122720016	6	Diamicton	32.5367	16.9122		PGM		2017-12-19		0	0	0	0	0	39.7782	0	0	0	0	0	0	0	0	0	60.2218	0	0	0	100
1227	122720025	1	Diamicton	28.337	22.6614		Intact	Remobilisé	2017-12-31		0	100	0	0	0	0	0	0	0	0	0	0	0	0	0	0	0	0	0	100
1227	122720025	2	Diamicton	22.7518	20.103		Intact	Remobilisé	2017-12-31		7.12927	92.8707	0	0	0	0	0	0	0	0	0	0	0	0	0	0	0	0	0	100
1227	122720025	3	Diamicton	17.2267	13.1267		PGM		2017-12-31		0	0	17.7506	0	0	0	0	0	0	38.2753	0	0	0	0	0	43.9741	0	0	0	100
1227	122720026	1	Diamicton	32.6868	22.6268		Modifié		2017-12-31		0	100	0	0	0	0	0	0	0	0	0	0	0	0	0	0	0	0	0	100
1227	122720026	2	Diamicton	31.9689	29.2037		Intact	Remobilisé	2017-12-31		1.83799	98.162	0	0	0	0	0	0	0	0	0	0	0	0	0	0	0	0	0	100
1227	122720026	3	Diamicton	45.8163	17.5394		Intact	Remobilisé	2017-12-31		8.23844	91.7616	0	0	0	0	0	0	0	0	0	0	0	0	0	0	0	0	0	100
1227	122720026	4	Diamicton	31.0574	21.4699		Modifié		2017-12-31		1.42346	98.5765	0	0	0	0	0	0	0	0	0	0	0	0	0	0	0	0	0	100
1227	122720026	5	Diamicton	103.367	59.9049		Modifié		2018-01-29		3.81	96.19	0	0	0	0	0	0	0	0	0	0	0	0	0	0	0	0	0	100
1227	122720027	1	Diamicton	36.2953	18.471		Intact	Intergranulaire	2017-12-31		5.88357	94.1164	0	0	0	0	0	0	0	0	0	0	0	0	0	0	0	0	0	100
1227	122720027	2	Diamicton	77.7894	63.1784		Modifié		2018-01-29		0	100	0	0	0	0	0	0	0	0	0	0	0	0	0	0	0	0	0	100
1227	122720027	3	Diamicton	117.535	115.062		Modifié		2018-01-29		5.01	94.99	0	0	0	0	0	0	0	0	0	0	0	0	0	0	0	0	0	100
1227	122720029	1	Diamicton	24.5856	19.9652		Modifié		2017-12-31		7.13979	92.8602	0	0	0	0	0	0	0	0	0	0	0	0	0	0	0	0	0	100
1227	122720029	2	Diamicton	31.4417	27.3986		Modifié		2017-12-31		3.37431	96.6257	0	0	0	0	0	0	0	0	0	0	0	0	0	0	0	0	0	100
1227	122720029	3	Diamicton	137.534	89.9227		Modifié		2018-01-29		11.56	88.44	0	0	0	0	0	0	0	0	0	0	0	0	0	0	0	0	0	100
1227	122720030	1	Diamicton	31.9161	25.7994		Modifié		2017-12-31		1.59129	98.4087	0	0	0	0	0	0	0	0	0	0	0	0	0	0	0	0	0	100
1227	122720030	10	Diamicton	19.6541	9.73891		Intact	Remobilisé	2017-12-31		8.80071	91.1993	0	0	0	0	0	0	0	0	0	0	0	0	0	0	0	0	0	100
1227	122720030	11	Diamicton	28.706	28.2562		Intact	Mutuel	2017-12-31		12.4108	87.5892	0	0	0	0	0	0	0	0	0	0	0	0	0	0	0	0	0	100
1227	122720030	12	Diamicton	56.2924	31.076		Modifié		2017-12-31		5.35163	94.6484	0	0	0	0	0	0	0	0	0	0	0	0	0	0	0	0	0	100
1227	122720030	13	Diamicton	34.7461	16.1147		Modifié		2017-12-31		2.80921	97.1908	0	0	0	0	0	0	0	0	0	0	0	0	0	0	0	0	0	100
1227	122720030	14	Diamicton	49.3599	29.3747		Modifié		2017-12-31		0	100	0	0	0	0	0	0	0	0	0	0	0	0	0	0	0	0	0	100
1227	122720030	15	Diamicton	114.297	106.665		Remodelé		2018-01-29		0.98	99.02	0	0	0	0	0	0	0	0	0	0	0	0	0	0	0	0	0	100
1227	122720030	16	Diamicton	256.445	149.033		Modifié		2018-01-29		11.48	88.52	0	0	0	0	0	0	0	0	0	0	0	0	0	0	0	0	0	100
1227	122720030	2	Diamicton	38.8895	22.5831		Intact	Remobilisé	2017-12-31		8.79975	91.2002	0	0	0	0	0	0	0	0	0	0	0	0	0	0	0	0	0	100
1227	122720030	3	Diamicton	49.1811	23.9444		Intact	Intergranulaire	2017-12-31		7.22238	92.7776	0	0	0	0	0	0	0	0	0	0	0	0	0	0	0	0	0	100
1227	122720030	4	Diamicton	33.9039	17.7839		Modifié		2017-12-31		2.17486	97.8251	0	0	0	0	0	0	0	0	0	0	0	0	0	0	0	0	0	100
1227	122720030	5	Diamicton	29.5575	19.0694		Modifié		2017-12-31		4.52519	95.4748	0	0	0	0	0	0	0	0	0	0	0	0	0	0	0	0	0	100
1227	122720030	6	Diamicton	18.4953	15.8472		Modifié		2017-12-31		4.22939	95.7706	0	0	0	0	0	0	0	0	0	0	0	0	0	0	0	0	0	100
1227	122720030	7	Diamicton	30.3539	20.7033		Modifié		2017-12-31		11.444	88.556	0	0	0	0	0	0	0	0	0	0	0	0	0	0	0	0	0	100
1227	122720030	8	Diamicton	16.4016	11.854		Modifié		2017-12-31		8.21076	91.7892	0	0	0	0	0	0	0	0	0	0	0	0	0	0	0	0	0	100
1227	122720030	9	Diamicton	21.4151	15.877		Intact	Intergranulaire	2017-12-31		5.82238	94.1776	0	0	0	0	0	0	0	0	0	0	0	0	0	0	0	0	0	100
1259	125920080	1	Diamicton	52.4211	35.4329		Pristine	Intergranular			7.4525	91.9331	0	0.614404	0	0	0	0	0	0	0	0	0	0	0	0	0	0	0	100
1259	125920080	2	Diamicton	63.179	33.146		Pristine	Remobilized			13.6001	85.3119	0	1.08801	0	0	0	0	0	0	0	0	0	0	0	0	0	0	0	100
1259	125920080	3	Diamicton	48.3359	45.9374		Pristine	Remobilized			6.09306	93.9069	0	0	0	0	0	0	0	0	0	0	0	0	0	0	0	0	0	100
1259	125920172	1	Diamicton	37.1469	34.2328		Modified				3.08767	96.0991	0	0.813215	0	0	0	0	0	0	0	0	0	0	0	0	0	0	0	100
1259	125920172	2	Diamicton	19.2967	17.3043		Modified				13.2886	85.8494	0	0.861966	0	0	0	0	0	0	0	0	0	0	0	0	0	0	0	100
1259	125920172	3	Diamicton	23.6572	21.2061		Modified				13.9515	85.2327	0	0.815739	0	0	0	0	0	0	0	0	0	0	0	0	0	0	0	100
1259	125920172	4	Diamicton	34.1733	22.3323		Modified				4.20527	95.2706	0	0.524135	0	0	0	0	0	0	0	0	0	0	0	0	0	0	0	100
1259	125920173	1	Diamicton	27.6918	22.1265		Modified				2.09763	97.0996	0	0.802797	0	0	0	0	0	0	0	0	0	0	0	0	0	0	0	100
1259	125920173	2	Diamicton	25.621	21.8627		Modified				0	99.2689	0	0.731059	0	0	0	0	0	0	0	0	0	0	0	0	0	0	0	100
1259	125920173	3	Diamicton	26.2485	18.1291		Reshaped				11.2444	88.0196	0	0.735996	0	0	0	0	0	0	0	0	0	0	0	0	0	0	0	100
1259	125920173	4	Diamicton	15.8159	10.1562		Reshaped		2018-09-30		20.1993	79.8007	0	0	0	0	0	0	0	0	0	0	0	0	0	0	0	0	0	100
1259	125920173	5	Diamicton	12.0204	4.86201		Pristine	Intergranular	2018-09-30		4.32839	95.6716	0	0	0	0	0	0	0	0	0	0	0	0	0	0	0	0	0	100
1259	125920173	6	Diamicton	8.71721	5.67546		Pristine	Crystalline	2018-09-30		6.63728	93.3627	0	0	0	0	0	0	0	0	0	0	0	0	0	0	0	0	0	100
1324	132420028	1	Diamicton	64.0334	35.3241	47.4246	Reshaped		2019-07-30		4.02608	95.9739	0	0	0	0	0	0	0	0	0	0	0	0	0	0	0	0	0	100
1324	132420028	10	Diamicton	34.8773	29.0986	31.9275	Reshaped		2019-07-30		2.63887	97.3611	0	0	0	0	0	0	0	0	0	0	0	0	0	0	0	0	0	100
1324	132420028	11	Diamicton	23.7951	16.2846	19.5614	Modified		2019-07-30		19.2308	80.7692	0	0	0	0	0	0	0	0	0	0	0	0	0	0	0	0	0	100
1324	132420028	12	Diamicton	37.0029	21.6064	27.5451	Reshaped		2019-07-30		11.4522	88.5478	0	0	0	0	0	0	0	0	0	0	0	0	0	0	0	0	0	100
1324	132420028	13	Diamicton	36.4709	23.6528	28.3711	Reshaped		2019-07-30		17.9875	82.0125	0	0	0	0	0	0	0	0	0	0	0	0	0	0	0	0	0	100
1324	132420028	14	Diamicton	38.0225	30.2698	33.6734	Modified		2019-07-30		11.4789	88.5211	0	0	0	0	0	0	0	0	0	0	0	0	0	0	0	0	0	100
1324	132420028	15	Diamicton	52.0119	32.7271	40.6769	Reshaped		2019-07-30		1.83424	98.1658	0	0	0	0	0	0	0	0	0	0	0	0	0	0	0	0	0	100
1324	132420028	16	Diamicton	94.8473	53.0695	70.751	Modified		2019-09-23		15.8778	84.1222	0	0	0	0	0	0	0	0	0	0	0	0	0	0	0	0	0	100
1324	132420028	17	Diamicton	121.393	98.5534	90.3858	Modified		2019-09-23		6.09871	93.9013	0	0	0	0	0	0	0	0	0	0	0	0	0	0	0	0	0	100
1324	132420028	18	Diamicton	67.5815	59.3851	59.6861	Modified		2019-09-23		15.0128	84.9872	0	0	0	0	0	0	0	0	0	0	0	0	0	0	0	0	0	100
1324	132420028	19	Diamicton	106.017	45.8693	67.7739	Modified		2019-09-23		3.74039	96.2596	0	0	0	0	0	0	0	0	0	0	0	0	0	0	0	0	0	100
1324	132420028	2	Diamicton	57.9335	33.0961	41.4703	Modified		2019-07-30		10.1453	89.8547	0	0	0	0	0	0	0	0	0	0	0	0	0	0	0	0	0	100
1324	132420028	20	Diamicton	191.916	173.238	179.153	Modified		2019-09-23		2.91232	97.0877	0	0	0	0	0	0	0	0	0	0	0	0	0	0	0	0	0	100
1324	132420028	21	Diamicton	74.3971	71.6849	69.2184	Modified		2019-09-23		3.38435	96.6156	0	0	0	0	0	0	0	0	0	0	0	0	0	0	0	0	0	100
1324	132420028	22	Diamicton	39.854	32.6827	34.5454	Modified		2019-09-23		15.1076	84.8924	0	0	0	0	0	0	0	0	0	0	0	0	0	0	0	0	0	100
1324	132420028	23	Diamicton	58.2458	43.4246	46.7808	Modified		2019-09-23		5.23965	94.7603	0	0	0	0	0	0	0	0	0	0	0	0	0	0	0	0	0	100
1324	132420028	24	Diamicton	82.6612	32.8765	48.3304	Modified		2019-09-23		4.38175	95.6183	0	0	0	0	0	0	0	0	0	0	0	0	0	0	0	0	0	100
1324	132420028	25	Diamicton	88.3802	69.4773	76.5976	Reshaped		2019-09-23		21.82	78.18	0	0	0	0	0	0	0	0	0	0	0	0	0	0	0	0	0	100
1324	132420028	26	Diamicton	63.9183	57.7135	59.6274	Reshaped		2019-09-23		55.8534	44.1466	0	0	0	0	0	0	0	0	0	0	0	0	0	0	0	0	0	100
1324	132420028	27	Diamicton	18.8319	17.8881	18.3637	Reshaped		2019-10-03		26.1433	73.8567	0	0	0	0	0	0	0	0	0	0	0	0	0	0	0	0	0	100
1324	132420028	28	Diamicton	56.0341	49.7942	50.6879	Modified		2019-10-03		7.58748	92.4125	0	0	0	0	0	0	0	0	0	0	0	0	0	0	0	0	0	100
1324	132420028	3	Diamicton	30.0717	26.0244	28.2119	Reshaped		2019-07-30		10.7035	89.2965	0	0	0	0	0	0	0	0	0	0	0	0	0	0	0	0	0	100
1324	132420028	4	Diamicton	37.8489	34.8553	35.8749	Reshaped		2019-07-30		4.13335	95.8667	0	0	0	0	0	0	0	0	0	0	0	0	0	0	0	0	0	100
1324	132420028	5	Diamicton	38.1495	25.0891	31.3584	Modified		2019-07-30		7.87487	92.1251	0	0	0	0	0	0	0	0	0	0	0	0	0	0	0	0	0	100
1324	132420028	6	Diamicton	61.1826	35.5438	46.0522	Modified		2019-07-30		9.05715	90.9429	0	0	0	0	0	0	0	0	0	0	0	0	0	0	0	0	0	100
1324	132420028	7	Diamicton	40.8651	28.0641	32.042	Modified		2019-07-30		2.19003	97.81	0	0	0	0	0	0	0	0	0	0	0	0	0	0	0	0	0	100
1324	132420028	8	Diamicton	32.5762	24.0335	28.5735	Modified		2019-07-30		6.04954	93.9505	0	0	0	0	0	0	0	0	0	0	0	0	0	0	0	0	0	100
1324	132420028	9	Diamicton	21.7884	21.5709	21.9169	Modified		2019-07-30		12.4331	87.5669	0	0	0	0	0	0	0	0	0	0	0	0	0	0	0	0	0	100
1324	132420055	1	Diamicton	30.9588	22.0398	25.5012	Modified		2019-07-31		5.07543	94.9246	0	0	0	0	0	0	0	0	0	0	0	0	0	0	0	0	0	100
1324	132420055	10	Diamicton	15.0976	11.614	12.8217	Modified		2019-07-31		0	100	0	0	0	0	0	0	0	0	0	0	0	0	0	0	0	0	0	100
1324	132420055	11	Diamicton	43.9096	23.9381	29.878	Modified		2019-07-31		8.694	91.306	0	0	0	0	0	0	0	0	0	0	0	0	0	0	0	0	0	100
1324	132420055	12	Diamicton	29.4284	21.6023	24.3608	Modified		2019-07-31		5.23908	94.7609	0	0	0	0	0	0	0	0	0	0	0	0	0	0	0	0	0	100
1324	132420055	13	Diamicton	27.2159	25.0241	26.044	Reshaped		2019-07-31		2.20731	96.2695	0	0	0	0	0	0	0	0	0	0	0	0	0	1.52317	0	0	0	100
1324	132420055	14	Diamicton	29.5228	15.6133	21.2408	Pristine	Crystalline	2019-07-31		11.5018	88.4982	0	0	0	0	0	0	0	0	0	0	0	0	0	0	0	0	0	100
1324	132420055	15	Diamicton	22.1295	17.7656	19.6448	Pristine	Crystalline	2019-07-31		8.84483	91.1552	0	0	0	0	0	0	0	0	0	0	0	0	0	0	0	0	0	100
1324	132420055	16	Diamicton	27.6809	27.2581	26.5441	Pristine	Intergranular	2019-07-31		9.29056	90.7094	0	0	0	0	0	0	0	0	0	0	0	0	0	0	0	0	0	100
1324	132420055	17	Diamicton	20.1475	16.8636	18.0441	Pristine	Intergranular	2019-07-31		15.7855	84.2145	0	0	0	0	0	0	0	0	0	0	0	0	0	0	0	0	0	100
1324	132420055	18	Diamicton	26.1139	13.8184	17.2108	Pristine	Remobilized	2019-07-31		5.95918	94.0408	0	0	0	0	0	0	0	0	0	0	0	0	0	0	0	0	0	100
1324	132420055	19	Diamicton	45.7099	23.2852	29.6545	Modified		2019-07-31		37.1712	62.8288	0	0	0	0	0	0	0	0	0	0	0	0	0	0	0	0	0	100
1324	132420055	2	Diamicton	27.0517	15.5358	20.2971	Pristine	Mutual	2019-07-31		12.7593	85.2178	0	0	0	0	0	0	0	2.02282	0	0	0	0	0	0	0	0	0	100
1324	132420055	20	Diamicton	79.2216	48.3553	58.2076	Modified		2019-07-31		8.15668	91.8433	0	0	0	0	0	0	0	0	0	0	0	0	0	0	0	0	0	100
1324	132420055	21	Diamicton	29.2426	20.281	24.4635	Modified		2019-07-31		33.0869	66.9131	0	0	0	0	0	0	0	0	0	0	0	0	0	0	0	0	0	100
1324	132420055	22	Diamicton	15.0281	14.2468	14.2447	Modified		2019-07-31		7.80995	92.19	0	0	0	0	0	0	0	0	0	0	0	0	0	0	0	0	0	100
1324	132420055	23	Diamicton	15.92	12.9228	14.1039	Pristine	Intergranular	2019-07-31		8.81959	91.1804	0	0	0	0	0	0	0	0	0	0	0	0	0	0	0	0	0	100
1324	132420055	24	Diamicton	30.4709	14.8061	20.2849	Pristine	Intergranular	2019-07-31		7.45372	92.5463	0	0	0	0	0	0	0	0	0	0	0	0	0	0	0	0	0	100
1324	132420055	25	Diamicton	24.3785	20.2952	21.4251	Reshaped		2019-07-31		15.9684	84.0316	0	0	0	0	0	0	0	0	0	0	0	0	0	0	0	0	0	100
1324	132420055	26	Diamicton	23.569	15.2425	18.1974	Modified		2019-07-31		0	100	0	0	0	0	0	0	0	0	0	0	0	0	0	0	0	0	0	100
1324	132420055	27	Diamicton	100.159	99.6626	93.8848	Modified		2019-09-23		11.7441	88.2559	0	0	0	0	0	0	0	0	0	0	0	0	0	0	0	0	0	100
1324	132420055	3	Diamicton	63.4083	34.2913	43.4731	Modified		2019-07-31		13.1544	86.8456	0	0	0	0	0	0	0	0	0	0	0	0	0	0	0	0	0	100
1324	132420055	4	Diamicton	28.8205	27.3703	27.4934	Reshaped		2019-07-31		14.8131	85.1869	0	0	0	0	0	0	0	0	0	0	0	0	0	0	0	0	0	100
1324	132420055	5	Diamicton	27.5837	23.789	25.6215	Pristine	Intergranular	2019-07-31		11.6423	87.6265	0	0	0.731159	0	0	0	0	0	0	0	0	0	0	0	0	0	0	100
1324	132420055	6	Diamicton	29.456	25.3642	25.9933	Modified		2019-07-31		15.6112	84.3888	0	0	0	0	0	0	0	0	0	0	0	0	0	0	0	0	0	100
1324	132420055	7	Diamicton	36.0389	16.1863	21.9618	Modified		2019-07-31		14.3837	85.6163	0	0	0	0	0	0	0	0	0	0	0	0	0	0	0	0	0	100
1324	132420055	8	Diamicton	44.1891	24.1277	31.1361	Modified		2019-07-31		12.5015	87.4985	0	0	0	0	0	0	0	0	0	0	0	0	0	0	0	0	0	100
1324	132420055	9	Diamicton	31.0733	16.572	21.7951	Modified		2019-07-31		28.5129	71.4871	0	0	0	0	0	0	0	0	0	0	0	0	0	0	0	0	0	100
1324	132420250	1	Diamicton	34.6141	24.3762	25.3207	Modified		2019-09-23		33.602	66.398	0	0	0	0	0	0	0	0	0	0	0	0	0	0	0	0	0	100
1324	132420250	2	Diamicton	44.7981	36.4333	37.1772	Modified		2019-09-23		1.62755	98.3724	0	0	0	0	0	0	0	0	0	0	0	0	0	0	0	0	0	100
1324	132420250	3	Diamicton	45.6539	24.2073	31.0202	Modified		2019-09-23		39.1143	60.8857	0	0	0	0	0	0	0	0	0	0	0	0	0	0	0	0	0	100
1324	132420250	4	Diamicton	22.529	14.9262	17.4432	Pristine	Intergranular	2019-09-23		2.84721	96.4711	0	0	0.681727	0	0	0	0	0	0	0	0	0	0	0	0	0	0	100
1259	125920173	a	Diamicton	7.98519	7.22567		PGM		2018-09-30		3.31734	0	13.8551	3.43571	0	0	0	0	0	50.7506	0	0	0	0	0	28.6412	0	0	0	100
914	91420515	1	Esker	282	187				2015-09-23		3.41	96.59																		100
937	93720031	1	Esker	121	85.7				2016-01-08		15.4	84.6																		100
937	93720031	1	Esker	31.4	28.9		Intact	Mutuel	2016-06-17		0	100				0				0		0								100
937	93720031	10	Esker	32.7	19.6		Modifié		2016-06-17		2.37042	97.6296				0				0		0								100
937	93720031	11	Esker	36.8	25.4		Intact	Intergranulaire	2016-06-17		0	100				0				0		0								100
937	93720031	12	Esker	70.6	29.2		Modifié		2016-06-17		4.91093	95.0891				0				0		0								100
937	93720031	13	Esker	21.2	16.4		Intact	Mutuel	2016-06-17		15.8279	84.1721				0				0		0								100
937	93720031	14	Esker	36.4	23		Intact	Mutuel	2016-06-17		18.5483	81.4517				0				0		0								100
937	93720031	15	Esker	45.9	29.4		Intact	Mutuel	2016-06-17		0.854701	99.1453				0				0		0								100
937	93720031	16	Esker	36.2	18.7		Intact	Mutuel	2016-06-17		0	100				0				0		0								100
937	93720031	17	Esker	47.9	35.2		Remodelé		2016-06-17		6.27889	93.7211				0				0		0								100
937	93720031	18	Esker	57.3	23.9		Remodelé		2016-06-17		10.7181	89.2819				0				0		0								100
937	93720031	19	Esker	62	28.4		Modifié		2016-06-17		13.4569	86.5431				0				0		0								100
937	93720031	2	Esker	78.8	45.4				2016-01-08		0	100																		100
937	93720031	2	Esker	38.3	24.8		Intact	Mutuel	2016-06-17		12.4129	87.5871				0				0		0								100
937	93720031	20	Esker	51.9	17.2		Remodelé		2016-06-17		2.71383	97.2862				0				0		0								100
937	93720031	3	Esker	35.7	27.7		Intact	Cristallin	2016-06-17		0.720355	99.2796				0				0		0								100
937	93720031	4	Esker	45.7	23.2		Modifié		2016-06-17		11.6359	88.3641				0				0		0								100
937	93720031	5	Esker	49.5	30.1		Remodelé		2016-06-17		2.74295	97.2571				0				0		0								100
937	93720031	6	Esker	41.3	19.3		Modifié		2016-06-17		2.22522	97.7748				0				0		0								100
937	93720031	7	Esker	39.2	23.9		Intact	Cristallin	2016-06-17		2.47136	97.5286				0				0		0								100
937	93720031	8	Esker	46.3	28		Remodelé		2016-06-17		0	100				0				0		0								100
937	93720031	9	Esker	44.1	29.2		Intact	Intergranulaire	2016-06-17		2.66377	97.3362				0				0		0								100
937	93720032	1	Esker	145	108				2016-01-08		4.55	95.45																		100
937	93720032	1	Esker	39.8	27.3		Modifié		2016-06-17		4.52881	95.4712				0				0		0								100
937	93720032	2	Esker	190	58				2016-01-08		13.24	86.76																		100
937	93720038	1	Esker	82.9	39.5				2016-01-08		6.62	93.38																		100
937	93720040	1	Esker	213	202				2016-01-08		10.73	89.27																		100
937	93720060	1	Esker	257	155				2016-01-08		5.63	94.37																		100
937	93720060	2	Esker	124	119				2016-01-08		0	100																		100
937	93720064	1	Esker	141	141				2016-01-08		3.51	96.49																		100
937	93720066	1	Esker	217	117				2016-01-08		3.19	96.81																		100
937	93720073	1	Esker	86.5	60				2016-01-08		1.96	98.04																		100
937	93720073	10	Esker	41.1	27.9				2016-01-08		19.18	80.82																		100
937	93720073	1	Esker	31.8	24.1		Intact	Mutuel	2016-06-17		4.56448	95.4355				0				0		0								100
937	93720073	11	Esker	53.2	41.1				2016-01-08		2.87	97.13																		100
937	93720073	12	Esker	76	41.2				2016-01-08		25.58	74.42																		100
937	93720073	2	Esker	120	106				2016-01-08		0	100																		100
937	93720073	2	Esker	66.1	43.6		Modifié		2016-06-17		8.29396	91.706				0				0		0								100
937	93720073	3	Esker	88.7	55.3				2016-01-08		3.03	96.97																		100
937	93720073	3	Esker	51.4	26.9		Modifié		2016-06-17		12.8962	87.1038				0				0		0								100
937	93720073	4	Esker	62.2	48.2				2016-01-08		0	100																		100
937	93720073	4	Esker	63.1	34.8		Remodelé		2016-06-17		4.52753	95.4725				0				0		0								100
937	93720073	5	Esker	62.9	53				2016-01-08		0	100																		100
937	93720073	6	Esker	62.7	41.4				2016-01-08		2.4	97.6																		100
937	93720073	7	Esker	71.7	35.1				2016-01-08		0	100																		100
937	93720073	8	Esker	74.5	53.3				2016-01-08		2.01	97.99																		100
937	93720073	9	Esker	80.8	40.3				2016-01-08		7.75	92.25																		100
937	93720075	1	Esker	55.8	33.7				2016-01-08		7.85	92.15																		100
937	93724002	1	Esker	115	55.4		Modifié		2016-06-21		15.82	84.18																		100
937	93724002	2	Esker	92.3	68.8		Modifié		2016-06-21		7.86	92.14																		100
937	93724002	3	Esker	62.5	49		Intact	Intergranulaire	2016-06-21		3.37	96.63																		100
937	93724002	4	Esker	51	39.9		Modifié		2016-06-21		35.14	64.86																		100
937	93724002	5	Esker	105	76.7		Modifié		2016-06-21		7.27	92.73																		100
937	93724002	6	Esker	69.4	37.9		Intact	Cristallin	2016-06-21		7.76	92.24																		100
937	93724002	7	Esker	82.9	33.4		Intact	Intergranulaire	2016-06-21		0	100																		100
937	93724002	8	Esker	51.1	46		Intact	Cristallin	2016-06-21		0	100																		100
937	93724002	9	Esker	42.2	30.8		Modifié		2016-06-21		0	100																		100
937	93724005	1	Esker	244	112		Modifié		2016-06-21		2.04	97.96																		100
937	93724033	1	Esker	52.4	39		Remodelé		2016-06-21		2.54	97.46																		100
937	93724033	2	Esker	127	118		Remodelé		2016-06-21		0	100																		100
937	93724046	1	Esker	101	70		Intact	Cristallin	2016-06-21		5.23	94.77																		100
937	93724046	2	Esker	160	89		Remodelé		2016-06-21		2.6	97.4																		100
937	93724046	3	Esker	114	109		Intact	Cristallin	2016-06-21		8.96	91.04																		100
937	93724178	1	Esker	125	112		Modifié		2016-06-21		18.63	81.37																		100
937	93724284	1	Esker	102	54.8		Intact	Mutuel	2016-06-21		4.59	95.41																		100
964	96420470	1	Esker	261	237						0	100																		100
964	96420529	1	Esker	394	321						0	100																		100
966	96620013	1	Esker	331	131						0	100																		100
966	96620013	10	Esker	137	88.7						2.1	97.9																		100
966	96620013	11	Esker	357	267						10.46	89.54																		100
966	96620013	12	Esker	57.4	50.7						2.55	97.45																		100
966	96620013	14	Esker	78	70.4						4.59	95.41																		100
966	96620013	15	Esker	93.9	77.1						5.49	94.51																		100
966	96620013	16	Esker	147	90.6						1.91	98.09																		100
966	96620013	17	Esker	140	111						3.34	96.66																		100
966	96620013	18	Esker	189	155						3.6	96.4																		100
966	96620013	19	Esker	170	117						7.03	92.97																		100
966	96620013	2	Esker	112	102						8.5	91.5																		100
966	96620013	20	Esker	273	194						4.25	95.75																		100
966	96620013	3	Esker	152	79.8						15.88	84.12																		100
966	96620013	4	Esker	149	112						0	100																		100
966	96620013	5	Esker	159	112						6.71	93.29																		100
966	96620013	6	Esker	232	144						0	100																		100
966	96620013	7	Esker	248	139						2.54	97.46																		100
966	96620013	8	Esker	260	155						0	100																		100
966	96620013	9	Esker	203	137						2.68	97.32																		100
966	96620014	1	Esker	124	107						0	100																		100
966	96620014	2	Esker	144	103						2.04	97.96																		100
966	96620014	3	Esker	160	99.7						2.98	97.02																		100
966	96620015	1	Esker	149	119						5.62	94.38																		100
966	96620016	1	Esker	126	121						0	100																		100
966	96620016	2	Esker	131	99.3						0	100																		100
966	96620016	3	Esker	157	134						4.1	95.9																		100
966	96620016	4	Esker	184	123						10.42	89.58																		100
966	96620016	5	Esker	167	163						6.83	93.17																		100
966	96620016	6	Esker	223	165						2.29	97.71																		100
966	96620016	7	Esker	237	142						14.04	85.96																		100
966	96620016	8	Esker	120	78.8						3.63	96.37																		100
966	96620016	9	Esker	125	103						38.51	61.49																		100
966	96620017	1	Esker	101	89.2						2.16	97.84																		100
966	96620023	1	Esker	258	203						0	100																		100
966	96620024	1	Esker	174	116						10.27	89.73																		100
966	96620024	2	Esker	257	178						2.02	97.98																		100
966	96620024	3	Esker	291	181						4.12	95.88																		100
966	96620024	4	Esker	426	160						0	100																		100
966	96620024	5	Esker	152	92.5						11.85	88.15																		100
966	96620024	6	Esker	122	71.2						24.26	75.74																		100
966	96620025	1	Esker	223	138						0	100																		100
966	96620025	2	Esker	146	135						8.34	91.66																		100
966	96620025	3	Esker	120	80.6						4.93	95.07																		100
966	96620025	4	Esker	451	217						12.2	87.8																		100
966	96620025	5	Esker	101	84.2						11.27	88.73																		100
966	96620026	1	Esker	286	138						9.91	90.09																		100
966	96620026	2	Esker	104	88.1						0	100																		100
966	96620045	1	Esker	180	130						2.89	97.11																		100
966	96620045	2	Esker	176	127						0	100																		100
966	96620045	3	Esker	187	179						1.92	98.08																		100
966	96620045	4	Esker	143	103						13.12	86.88																		100
966	96620045	5	Esker	144	100						3.1	96.9																		100
966	96620045	6	Esker	169	111						4.46	95.54																		100
966	96620045	7	Esker	199	133						3.1	96.9																		100
966	96620045	8	Esker	218	133						0	100																		100
966	96620051	1	Esker	161	140						1.94	98.06																		100
966	96620064	1	Esker	193	109						0	100																		100
966	96620064	2	Esker	334	205						4.66	95.34																		100
966	96620069	1	Esker	180	114						5.41	94.59																		100
966	96620088	1	Esker	227	189						0	100																		100
966	96620170	1	Esker	382	338						3.47	96.53																		100
966	96620191	1	Esker	308	150						2.05	97.95																		100
967	96720013	1	Esker	91.27	69.5348	76.7901	Modifié		2018-07-04		25.7808	74.2192	0	0	0	0	0	0	0	0	0	0	0	0	0	0	0	0	0	100
967	96720013	2	Esker	157.407	69.508	97.5727	Remodelé		2018-07-04		7.15031	85.5532	0	0	0	0	0	0	0	0	0	0	0	0	0	0	0	7.29645	0	100
967	96720013	3	Esker	82.476	61.8374	71.0172	Modifié		2018-07-04		3.29407	96.7059	0	0	0	0	0	0	0	0	0	0	0	0	0	0	0	0	0	100
967	96720064	1	Esker	39.1764	37.5341	36.1281	Intact	Cristallin	2018-02-22		0	100	0	0	0	0	0	0	0	0	0	0	0	0	0	0	0	0	0	100
967	96720064	2	Esker	42.3083	32.7693	38.2311	Remodelé		2018-02-22		7.74948	92.2505	0	0	0	0	0	0	0	0	0	0	0	0	0	0	0	0	0	100
967	96720224	1	Esker	57.4037	42.3448	45.1203	Modifié		2018-06-01		4.9126	95.0874	0	0	0	0	0	0	0	0	0	0	0	0	0	0	0	0	0	100
967	96720224	2	Esker	116.435	103.802	103.682	Modifié		2018-07-19		0	94.2661	0	0	0	0	0	0	0	0	0	0	0	0	0	5.73386	0	0	0	100
967	96720233	1	Esker	36.6264	18.3634	22.2108	Intact	Intergranulaire	2018-05-28		14.9964	85.0036	0	0	0	0	0	0	0	0	0	0	0	0	0	0	0	0	0	100
967	96720233	2	Esker	243.231	217.543	220.421	Remodelé		2018-07-19		0	93.001	0	0	0	0	0	0	0	0	0	0	0	0	0	6.99904	0	0	0	100
967	96720233	3	Esker	211.649	159.443	177.224	Modifié		2018-07-19		0	93.2806	0	0.946221	0	0	0	0	0	0	0	0	0	0	0	5.77315	0	0	0	100
967	96720233	4	Esker	229.117	196.187	205.858	Intact	Cristallin	2018-07-19		0	94.9982	0	0	0	0	0	0	0	0	0	0	0	0	0	5.00178	0	0	0	100
967	96720233	5	Esker	67.4559	63.7472	65.1087	Modifié		2018-07-19		18.6924	80.4367	0	0.870882	0	0	0	0	0	0	0	0	0	0	0	0	0	0	0	100
967	96720249	1	Esker	54.3383	50.0017	49.8341	Modifié		2018-06-01		1.33579	98.6642	0	0	0	0	0	0	0	0	0	0	0	0	0	0	0	0	0	100
967	96720249	10	Esker	18.0949	16.8358	17.2003	Intact	Mutuel	2018-06-01		0	100	0	0	0	0	0	0	0	0	0	0	0	0	0	0	0	0	0	100
967	96720249	11	Esker	48.5771	40.991	41.9464	Modifié		2018-06-01		5.60185	94.3982	0	0	0	0	0	0	0	0	0	0	0	0	0	0	0	0	0	100
967	96720249	12	Esker	27.366	26.9745	25.7121	Modifié		2018-06-01		8.80812	91.1919	0	0	0	0	0	0	0	0	0	0	0	0	0	0	0	0	0	100
967	96720249	13	Esker	60.8647	52.0791	52.9718	Modifié		2018-06-01		2.3963	97.6037	0	0	0	0	0	0	0	0	0	0	0	0	0	0	0	0	0	100
967	96720249	14	Esker	58.5508	26.2055	38.2932	Modifié		2018-06-01		2.34824	97.6518	0	0	0	0	0	0	0	0	0	0	0	0	0	0	0	0	0	100
967	96720249	15	Esker	77.5842	31.4409	42.3602	Intact	Remobilisé	2018-06-01		16.1545	83.8455	0	0	0	0	0	0	0	0	0	0	0	0	0	0	0	0	0	100
967	96720249	16	Esker	48.7629	27.4191	35.2851	Intact	Intergranulaire	2018-06-01		0	100	0	0	0	0	0	0	0	0	0	0	0	0	0	0	0	0	0	100
967	96720249	17	Esker	71.5346	22.0453	39.8093	Intact	Mutuel	2018-06-01		44.267	55.733	0	0	0	0	0	0	0	0	0	0	0	0	0	0	0	0	0	100
967	96720249	18	Esker	72.8791	26.6193	39.9705	Intact	Intergranulaire	2018-06-01		4.23051	95.7695	0	0	0	0	0	0	0	0	0	0	0	0	0	0	0	0	0	100
967	96720249	19	Esker	78.0608	50.6533	61.9707	Remodelé		2018-06-01		0	100	0	0	0	0	0	0	0	0	0	0	0	0	0	0	0	0	0	100
967	96720249	2	Esker	40.2399	28.9882	32.0209	Modifié		2018-06-01		0.933615	99.0664	0	0	0	0	0	0	0	0	0	0	0	0	0	0	0	0	0	100
967	96720249	20	Esker	23.5863	19.8214	20.5954	PGM		2018-06-01		0	0	0	0	1.65941	38.2618	0	0	0	0	0	0	0	0	0	60.0788	0	0	0	100
967	96720249	21	Esker	118.285	69.9124	79.5727	Modifié		2018-07-19		3.87521	89.5808	0	0.792103	0	0	0	0	0	0	0	0	0	0	0	5.75189	0	0	0	100
967	96720249	22	Esker	89.7845	80.8614	80.9572	Modifié		2018-07-19		0	100	0	0	0	0	0	0	0	0	0	0	0	0	0	0	0	0	0	100
967	96720249	23	Esker	102.187	41.7435	61.6873	Modifié		2018-07-19		25.6076	74.3924	0	0	0	0	0	0	0	0	0	0	0	0	0	0	0	0	0	100
967	96720249	24	Esker	101.999	48.1393	68.7759	Modifié		2018-07-19		0	100	0	0	0	0	0	0	0	0	0	0	0	0	0	0	0	0	0	100
967	96720249	25	Esker	67.423	56.759	59.329	Modifié		2018-07-19		4.40227	88.9362	0	0	0	0	0	0	0	0	0	0	0	0	0	6.6615	0	0	0	100
967	96720249	26	Esker	196.495	109.403	136.115	Modifié		2018-07-19		0	98.5823	0	1.41771	0	0	0	0	0	0	0	0	0	0	0	0	0	0	0	100
967	96720249	27	Esker	80.1416	63.1571	70.6059	Remodelé		2018-07-19		0	99.3334	0	0.66658	0	0	0	0	0	0	0	0	0	0	0	0	0	0	0	100
967	96720249	28	Esker	112.105	87.971	91.7452	Modifié		2018-07-19		0	100	0	0	0	0	0	0	0	0	0	0	0	0	0	0	0	0	0	100
967	96720249	29	Esker	97.0266	81.4967	86.2645	Modifié		2018-07-19		3.1713	96.8287	0	0	0	0	0	0	0	0	0	0	0	0	0	0	0	0	0	100
967	96720249	3	Esker	54.7252	44.9607	47.2028	Modifié		2018-06-01		9.21841	90.7816	0	0	0	0	0	0	0	0	0	0	0	0	0	0	0	0	0	100
967	96720249	30	Esker	108.674	83.7196	93.4184	Modifié		2018-07-19		3.82732	96.1727	0	0	0	0	0	0	0	0	0	0	0	0	0	0	0	0	0	100
967	96720249	31	Esker	95.7163	62.1749	74.7038	Modifié		2018-07-19		2.85263	89.6334	0	0	0	0	0	0	0	0	0	0	0	0	0	7.51396	0	0	0	100
967	96720249	4	Esker	49.0774	31.2742	34.0075	Intact	Intergranulaire	2018-06-01		2.44542	97.5546	0	0	0	0	0	0	0	0	0	0	0	0	0	0	0	0	0	100
967	96720249	5	Esker	46.0373	44.4436	44.7737	Remodelé		2018-06-01		2.15009	97.8499	0	0	0	0	0	0	0	0	0	0	0	0	0	0	0	0	0	100
967	96720249	6	Esker	58.8776	43.0106	46.742	Modifié		2018-06-01		1.50242	98.4976	0	0	0	0	0	0	0	0	0	0	0	0	0	0	0	0	0	100
967	96720249	7	Esker	32.043	27.3228	28.1355	Intact	Mutuel	2018-06-01		0	100	0	0	0	0	0	0	0	0	0	0	0	0	0	0	0	0	0	100
967	96720249	8	Esker	21.2283	18.2993	16.8328	Intact	Intergranulaire	2018-06-01		1.59153	98.4085	0	0	0	0	0	0	0	0	0	0	0	0	0	0	0	0	0	100
967	96720249	9	Esker	30.2029	23.2739	22.1743	Intact	Remobilisé	2018-06-01		11.0687	88.9313	0	0	0	0	0	0	0	0	0	0	0	0	0	0	0	0	0	100
967	96720293	1	Esker	47.6434	27.4652	36.0353	Intact	Intergranulaire	2018-06-07		16.9071	83.0929	0	0	0	0	0	0	0	0	0	0	0	0	0	0	0	0	0	100
967	96720293	10	Esker	395.567	258.536	319.334	Remodelé		2018-07-20		2.54218	96.6142	0	0.843593	0	0	0	0	0	0	0	0	0	0	0	0	0	0	0	100
967	96720293	2	Esker	25.4574	21.8399	23.7161	Intact	Mutuel	2018-06-07		23.5764	76.4236	0	0	0	0	0	0	0	0	0	0	0	0	0	0	0	0	0	100
967	96720293	3	Esker	51.6364	28.5215	35.7943	Intact	Remobilisé	2018-06-07		12.867	87.133	0	0	0	0	0	0	0	0	0	0	0	0	0	0	0	0	0	100
967	96720293	4	Esker	41.1598	33.4101	37.046	Modifié		2018-06-07		3.17107	96.8289	0	0	0	0	0	0	0	0	0	0	0	0	0	0	0	0	0	100
967	96720293	5	Esker	20.2286	19.9087	19.7681	Intact	Mutuel	2018-06-07		0	100	0	0	0	0	0	0	0	0	0	0	0	0	0	0	0	0	0	100
967	96720293	6	Esker	46.7912	40.4845	42.9328	Remodelé		2018-06-07		5.20154	94.7985	0	0	0	0	0	0	0	0	0	0	0	0	0	0	0	0	0	100
967	96720293	7	Esker	53.0838	43.1884	47.4023	Remodelé		2018-06-07		2.61015	97.3899	0	0	0	0	0	0	0	0	0	0	0	0	0	0	0	0	0	100
967	96720293	8	Esker	361.465	306.566	338.956	Modifié		2018-07-20		5.91025	92.8059	0	1.28383	0	0	0	0	0	0	0	0	0	0	0	0	0	0	0	100
967	96720293	9	Esker	151.206	91.2427	110.664	Modifié		2018-07-20		3.88292	95.1611	0	0.955978	0	0	0	0	0	0	0	0	0	0	0	0	0	0	0	100
967	96720332	1	Esker	25.3161	19.5296	22.2612	Intact	Cristallin	2018-06-28		0	100	0	0	0	0	0	0	0	0	0	0	0	0	0	0	0	0	0	100
967	96720333	1	Esker	21.9258	21.5303	20.525	Intact	Mutuel	2018-06-15		14.193	85.807	0	0	0	0	0	0	0	0	0	0	0	0	0	0	0	0	0	100
967	96720333	2	Esker	45.5608	23.1101	29.2358	Intact	Intergranulaire	2018-06-15		8.50783	91.4922	0	0	0	0	0	0	0	0	0	0	0	0	0	0	0	0	0	100
967	96720333	3	Esker	249.104	174.108	200.978	Modifié		2018-07-23		0	100	0	0	0	0	0	0	0	0	0	0	0	0	0	0	0	0	0	100
967	96720333	4	Esker	71.0777	38.6764	49.334	Modifié		2018-07-23		10.6925	89.3075	0	0	0	0	0	0	0	0	0	0	0	0	0	0	0	0	0	100
967	96720333	5	Esker	79.7259	44.2748	55.2971	Modifié		2018-07-23		3.66693	96.3331	0	0	0	0	0	0	0	0	0	0	0	0	0	0	0	0	0	100
967	96720335	1	Esker	23.5239	13.4264	17.3642	Intact	Mutuel	2018-06-28		18.0182	76.1173	0	0	0	0	0	0	0	0	0	0	0	0	0	5.86454	0	0	0	100
967	96720335	2	Esker	57.5001	52.9137	51.9874	Modifié		2018-07-23		0	99.1938	0	0.806165	0	0	0	0	0	0	0	0	0	0	0	0	0	0	0	100
1066	106620011	1	Esker	117	45.9				2015-09-15		8.53	91.47																		100
1066	106620011	10	Esker	60.6	36.4				2015-09-15		2.4	97.6																		100
1066	106620011	11	Esker	56.8	23.6				2015-09-15		4.21	95.79																		100
1066	106620011	1	Esker	165	129
1066	106620011	2	Esker	132	89.9				2015-09-15		10.47	89.53																		100
1066	106620011	3	Esker	116	104				2015-09-15		23.44	76.56																		100
1066	106620011	4	Esker	97.5	70.4				2015-09-15		0	100																		100
1066	106620011	5	Esker	67.9	62.4				2015-09-15		1.97	98.03																		100
1066	106620011	6	Esker	113	59.5				2015-09-15		10.24	89.76																		100
1066	106620011	7	Esker	100	61.5				2015-09-15		8.17	91.83																		100
1066	106620011	8	Esker	144	86.8				2015-09-15		11.79	88.21																		100
1066	106620011	9	Esker	84.8	65.7				2015-09-15		7.62	92.38																		100
1066	106620013	1	Esker	200	118				2015-09-15		4.23	95.77																		100
1066	106620013	2	Esker	245	80.7				2015-09-15		5.43	94.57																		100
1066	106620044	1	Esker	180	118				2015-09-15		0	100																		100
1066	106620044	2	Esker	157	94.6				2015-09-15		3.91	96.09																		100
1066	106620068	1	Esker	105	60.4				2015-09-15		0	100																		100
1066	106620077	1	Esker	111	105				2015-09-15		0	100																		100
1066	106621021	1	Esker	132	76.7		Remodelé		2016-05-30		8.46	91.54	0	0		0		0	0	0		0	0	0	0	0	0		0	100
1066	106621147	1	Esker	31.3	15.5		Intact	Cristallin	2016-04-16		9.54097	90.459	0	0		0		0	0	0		0	0	0	0	0	0		0	100
1066	106621151	1	Esker	31.5	22.4		Intact	Mutuel	2016-04-16		0	100	0	0		0		0	0	0		0	0	0	0	0	0		0	100
1066	106621151	2	Esker	28.4	24.6		Modifié		2016-04-16		0	100	0	0		0		0	0	0		0	0	0	0	0	0		0	100
1066	106621187	1	Esker	30.7	21.6		Intact	Mutuel	2016-04-18		5.51625	94.4838	0	0		0		0	0	0		0	0	0	0	0	0		0	100
1066	106621338	1	Esker	182	105		Modifié		2016-05-30		13.88	86.12	0	0		0		0	0	0		0	0	0	0	0	0		0	100
1066	106621407	1	Esker	855	1020		Modifié		2016-05-30		0	100	0	0		0		0	0	0		0	0	0	0	0	0		0	100
1066	106621407	2	Esker	167	135		Remodelé		2016-05-30		3.17	96.83	0	0		0		0	0	0		0	0	0	0	0	0		0	100
1066	106621407	3	Esker	64.5	26.7		Modifié		2016-04-29		6.84119	93.1588	0	0		0		0	0	0		0	0	0	0	0	0		0	100
1066	106621451	1	Esker	262	138		Remodelé		2016-05-30		0	100	0	0		0		0	0	0		0	0	0	0	0	0		0	100
1066	106621451	2	Esker	37	26.3		Intact	Cristallin	2016-05-01		28.8324	71.1676	0	0		0		0	0	0		0	0	0	0	0	0		0	100
1066	106621451	3	Esker	29.6	24.8		Intact	Cristallin	2016-05-01		27.1979	72.8021	0	0		0		0	0	0		0	0	0	0	0	0		0	100
1066	106621451	4	Esker	56.8	28.5		Intact	Mutuel	2016-05-01		13.3225	86.6775	0	0		0		0	0	0		0	0	0	0	0	0		0	100
1066	106621539	1	Esker	99.2	43.4		Intact	Intergranulaire	2016-05-30		18.21	81.79	0	0		0		0	0	0		0	0	0	0	0	0		0	100
1066	106622009	1	Esker	36.4598	22.0034		PGM		2017-08-04		93.0879	0	6.91207	0	0	0	0	0	0	0	0	0	0	0	0	0	0	0	0	100
1066	106622024	1	Esker	26.8962	19.5371		Remodelé		2017-08-12		4.66144	95.3386	0	0	0	0	0	0	0	0	0	0	0	0	0	0	0	0	0	100
1066	106622030	1	Esker	51.7206	35.6903		Modifié		2017-08-12		2.76365	97.2364	0	0	0	0	0	0	0	0	0	0	0	0	0	0	0	0	0	100
1066	106622050	1	Esker	31.137	29.454		Modifié		2017-08-15		12.9964	87.0036	0	0	0	0	0	0	0	0	0	0	0	0	0	0	0	0	0	100
1066	106622050	2	Esker	17.9513	11.7811		Modifié		2017-08-15		5.99262	94.0074	0	0	0	0	0	0	0	0	0	0	0	0	0	0	0	0	0	100
1066	106622084	1	Esker	20.4814	8.54482		Intact	Intergranulaire	2017-08-19		2.19366	96.6815	0	0	1.12479	0	0	0	0	0	0	0	0	0	0	0	0	0	0	100
1066	106622084	10	Esker	21.4247	10.5152		PGM		2017-08-19		92.3926	0	7.60739	0	0	0	0	0	0	0	0	0	0	0	0	0	0	0	0	100
1066	106622084	11	Esker	23.2862	17.8399		PGM		2017-08-19		91.5812	0	8.41877	0	0	0	0	0	0	0	0	0	0	0	0	0	0	0	0	100
1066	106622084	12	Esker	35.9763	34.1901		PGM		2017-08-19		91.1212	0	8.87879	0	0	0	0	0	0	0	0	0	0	0	0	0	0	0	0	100
1066	106622084	13	Esker	33.0439	24.2828		PGM		2017-08-19		91.4658	0	8.53416	0	0	0	0	0	0	0	0	0	0	0	0	0	0	0	0	100
1066	106622084	14	Esker	35.9066	34.618		PGM		2017-08-19		91.2639	0	8.73612	0	0	0	0	0	0	0	0	0	0	0	0	0	0	0	0	100
1066	106622084	15	Esker	22.2134	16.6929		PGM		2017-08-19		90.5102	0	9.4898	0	0	0	0	0	0	0	0	0	0	0	0	0	0	0	0	100
1066	106622084	16	Esker	37.1815	27.9871		PGM		2017-08-19		90.6976	0	9.30243	0	0	0	0	0	0	0	0	0	0	0	0	0	0	0	0	100
1066	106622084	17	Esker	33.0955	27.4187		PGM		2017-08-19		90.5605	0	9.43948	0	0	0	0	0	0	0	0	0	0	0	0	0	0	0	0	100
1066	106622084	18	Esker	19.5174	16.1894		PGM		2017-08-19		91.3096	0	8.69042	0	0	0	0	0	0	0	0	0	0	0	0	0	0	0	0	100
1066	106622084	19	Esker	26.219	15.0486		PGM		2017-08-19		92.4598	0	7.54024	0	0	0	0	0	0	0	0	0	0	0	0	0	0	0	0	100
1066	106622084	2	Esker	48.1725	27.9888		Modifié		2017-08-19		0	100	0	0	0	0	0	0	0	0	0	0	0	0	0	0	0	0	0	100
1066	106622084	20	Esker	30.7154	22.134		PGM		2017-08-19		91.4108	0	8.58925	0	0	0	0	0	0	0	0	0	0	0	0	0	0	0	0	100
1066	106622084	21	Esker	20.9729	15.4033		PGM		2017-08-19		90.6108	0	9.38921	0	0	0	0	0	0	0	0	0	0	0	0	0	0	0	0	100
1066	106622084	22	Esker	31.071	25.4431		PGM		2017-08-19		92.77	0	7.23001	0	0	0	0	0	0	0	0	0	0	0	0	0	0	0	0	100
1066	106622084	23	Esker	36.6482	33.0179		PGM		2017-08-19		89.883	0	10.117	0	0	0	0	0	0	0	0	0	0	0	0	0	0	0	0	100
1066	106622084	24	Esker	38.3687	32.5466		PGM		2017-08-19		93.3253	0	6.67474	0	0	0	0	0	0	0	0	0	0	0	0	0	0	0	0	100
1066	106622084	25	Esker	19.807	16.4581		PGM		2017-08-19		92.0897	0	7.91026	0	0	0	0	0	0	0	0	0	0	0	0	0	0	0	0	100
1066	106622084	3	Esker	18.969	17.7667		PGM		2017-08-19		92.1508	0	7.84918	0	0	0	0	0	0	0	0	0	0	0	0	0	0	0	0	100
1066	106622084	4	Esker	28.7588	27.4952		PGM		2017-08-19		91.2116	0	8.78844	0	0	0	0	0	0	0	0	0	0	0	0	0	0	0	0	100
1066	106622084	5	Esker	21.1027	12.8144		PGM		2017-08-19		91.8992	0	8.10082	0	0	0	0	0	0	0	0	0	0	0	0	0	0	0	0	100
1066	106622084	6	Esker	31.317	24.7735		PGM		2017-08-19		92.2926	0	7.70736	0	0	0	0	0	0	0	0	0	0	0	0	0	0	0	0	100
1066	106622084	7	Esker	46.3016	30.2413		PGM		2017-08-19		92.4627	0	7.53732	0	0	0	0	0	0	0	0	0	0	0	0	0	0	0	0	100
1066	106622084	8	Esker	32.1107	18.3841		PGM		2017-08-19		89.8934	0	10.1066	0	0	0	0	0	0	0	0	0	0	0	0	0	0	0	0	100
1066	106622084	9	Esker	37.1732	32.4413		PGM		2017-08-19		92.3681	0	7.63186	0	0	0	0	0	0	0	0	0	0	0	0	0	0	0	0	100
1066	106622110	1	Esker	66.7489	33.0088		Remodelé		2017-08-22		2.36535	97.6347	0	0	0	0	0	0	0	0	0	0	0	0	0	0	0	0	0	100
1066	106622110	2	Esker	69.1326	34.7853		Modifié		2017-08-22		0	100	0	0	0	0	0	0	0	0	0	0	0	0	0	0	0	0	0	100
1066	106622165	1	Esker	50.6635	30.0577		PGM		2017-08-29		0	0	23.2954	7.57674	0	0	0	0	0	65.0954	0	0	0	0	0	4.03238	0	0	0	100
1066	106622190	1	Esker	17.801	12.2595		Intact	Intergranulaire	2017-09-04		30.442	69.558	0	0	0	0	0	0	0	0	0	0	0	0	0	0	0	0	0	100
1066	106622190	2	Esker	20.7799	8.39879		Intact	Intergranulaire	2017-09-04		0	100	0	0	0	0	0	0	0	0	0	0	0	0	0	0	0	0	0	100
1066	106622190	3	Esker	22.9823	16.874		Intact	Intergranulaire	2017-09-04		0	100	0	0	0	0	0	0	0	0	0	0	0	0	0	0	0	0	0	100
1066	106622190	4	Esker	35.8757	22.9281		Modifié		2017-09-04		3.58883	96.4112	0	0	0	0	0	0	0	0	0	0	0	0	0	0	0	0	0	100
1066	106622190	5	Esker	46.004	36.146		Intact	Intergranulaire	2017-09-04		7.4521	92.5479	0	0	0	0	0	0	0	0	0	0	0	0	0	0	0	0	0	100
1066	106622190	6	Esker	25.794	22.9621		PGM		2017-09-04		0	0	22.2986	0	0	0	0	0	0	77.7014	0	0	0	0	0	0	0	0	0	100
1066	106622190	7	Esker	20.0772	13.7326		PGM		2017-09-04		0	0	15.4858	0	0	0	0	0	0	21.0044	0	0	0	0	0	63.5098	0	0	0	100
1066	106623024	1	Esker	56.0149	24.4709		PGM		2018-06-29		96.9817	0	0	0	3.01834	0	0	0	0	0	0	0	0	0	0	0	0	0	0	100
1066	106623024	2	Esker	55.4308	40.7749		PGM		2018-06-29		96.7866	0	0	0	3.21335	0	0	0	0	0	0	0	0	0	0	0	0	0	0	100
1066	106623024	3	Esker	39.8862	21.7605		PGM		2018-06-29		96.8597	0	0	0	3.14026	0	0	0	0	0	0	0	0	0	0	0	0	0	0	100
1066	106623024	4	Esker	78.5022	40.8301		PGM		2018-06-29		90.7313	0	0	0	9.26873	0	0	0	0	0	0	0	0	0	0	0	0	0	0	100
1066	106623030	1	Esker	44.4717	20.5951		Modified		2018-06-29		3.83006	96.1699	0	0	0	0	0	0	0	0	0	0	0	0	0	0	0	0	0	100
1066	106623038	1	Esker	31.4144	30.7638		Intact	Mutual	2018-06-29		3.85276	96.1472	0	0	0	0	0	0	0	0	0	0	0	0	0	0	0	0	0	100
1066	106623038	2	Esker	66.6395	24.8155		PGM		2018-06-29		97.7172	0	0	0	2.2828	0	0	0	0	0	0	0	0	0	0	0	0	0	0	100
1066	106623062	1	Esker	22.0252	15.7036		Intact	Intergranular	2018-07-04		23.0298	76.9702	0	0	0	0	0	0	0	0	0	0	0	0	0	0	0	0	0	100
1066	106623062	2	Esker	25.2009	17.9639		Intact	Mutual	2018-07-04		14.6073	82.949	0	0	2.44372	0	0	0	0	0	0	0	0	0	0	0	0	0	0	100
1066	106623062	3	Esker	58.1708	56.4079		PGM		2018-07-04		86.4377	0	0	0	13.5623	0	0	0	0	0	0	0	0	0	0	0	0	0	0	100
1066	106623063	1	Esker	23.0092	16.0707		Intact	Mutual	2018-07-04		54.6654	45.3346	0	0	0	0	0	0	0	0	0	0	0	0	0	0	0	0	0	100
1066	106623063	2	Esker	28.4177	20.9083		PGM		2018-07-04		96.5541	0	0	0	3.44593	0	0	0	0	0	0	0	0	0	0	0	0	0	0	100
1066	106623063	3	Esker	37.8337	25.2717		PGM		2018-07-04		94.9337	0	0	0	5.06632	0	0	0	0	0	0	0	0	0	0	0	0	0	0	100
1066	106623063	4	Esker	41.6961	37.8086		PGM		2018-07-04		93.424	0	0	0	6.57603	0	0	0	0	0	0	0	0	0	0	0	0	0	0	100
1066	106623063	5	Esker	59.8201	29.0154		PGM		2018-07-04		100	0	0	0	0	0	0	0	0	0	0	0	0	0	0	0	0	0	0	100
1066	106623063	6	Esker	47.5309	26.9279		PGM		2018-07-04		95.0196	0	0	0	4.9804	0	0	0	0	0	0	0	0	0	0	0	0	0	0	100
1066	106623063	7	Esker	83.1877	38.0653		PGM		2018-07-04		89.1753	0	0	0	10.8247	0	0	0	0	0	0	0	0	0	0	0	0	0	0	100
1066	106623068	1	Esker	48.8724	23.7177		PGM		2018-07-04		72.8511	0	0.984388	1.04433	25.1202	0	0	0	0	0	0	0	0	0	0	0	0	0	0	100
1066	106623068	10	Esker	64.3396	26.3154		PGM		2018-07-04		91.7446	0	0	1.45706	6.79831	0	0	0	0	0	0	0	0	0	0	0	0	0	0	100
1066	106623068	11	Esker	35.6092	26.274		PGM		2018-07-04		97.3186	0	0	0	2.68136	0	0	0	0	0	0	0	0	0	0	0	0	0	0	100
1066	106623068	12	Esker	71.772	35.4486		PGM		2018-07-04		92.9901	0	0.393158	0	6.61675	0	0	0	0	0	0	0	0	0	0	0	0	0	0	100
1066	106623068	13	Esker	106.483	39.3773		PGM		2018-07-04		98.3709	0	0	0	1.62908	0	0	0	0	0	0	0	0	0	0	0	0	0	0	100
1066	106623068	14	Esker	39.2919	23.4221		PGM		2018-07-04		89.5561	0	0.385663	0.768926	9.28931	0	0	0	0	0	0	0	0	0	0	0	0	0	0	100
1066	106623068	15	Esker	68.2436	62.7024		Reshaped		2018-08-01		1.09629	98.9037		0	0					0										100
1066	106623068	2	Esker	40.4289	24.6045		PGM		2018-07-04		95.9675	0	0	0.840578	3.19191	0	0	0	0	0	0	0	0	0	0	0	0	0	0	100
1066	106623068	3	Esker	60.3794	33.3409		PGM		2018-07-04		96.2256	0	0	0	3.77436	0	0	0	0	0	0	0	0	0	0	0	0	0	0	100
1066	106623068	4	Esker	74.2776	30.5712		PGM		2018-07-04		94.5628	0	0	0.884183	4.55303	0	0	0	0	0	0	0	0	0	0	0	0	0	0	100
1066	106623068	5	Esker	42.1462	32.6601		PGM		2018-07-04		97.5225	0	0	1.15444	1.3231	0	0	0	0	0	0	0	0	0	0	0	0	0	0	100
1066	106623068	6	Esker	28.7664	25.8737		PGM		2018-07-04		91.247	0	0	0	8.75302	0	0	0	0	0	0	0	0	0	0	0	0	0	0	100
1066	106623068	7	Esker	42.7001	23.4252		PGM		2018-07-04		92.4882	0	0	0	7.51181	0	0	0	0	0	0	0	0	0	0	0	0	0	0	100
1066	106623068	8	Esker	53.6538	24.3164		PGM		2018-07-04		69.6629	0	0	0	30.3371	0	0	0	0	0	0	0	0	0	0	0	0	0	0	100
1066	106623068	9	Esker	59.3215	48.2202		PGM		2018-07-04		94.5453	0	0	1.62542	3.82929	0	0	0	0	0	0	0	0	0	0	0	0	0	0	100
1066	106623082	1	Esker	70.005	27.6047		Intact	Intergranular	2018-07-05		2.47807	96.7945	0	0.727464	0	0	0	0	0	0	0	0	0	0	0	0	0	0	0	100
1066	106623082	2	Esker	40.214	12.1239		Intact	Remobilized	2018-07-05		15.5677	83.621	0	0.811228	0	0	0	0	0	0	0	0	0	0	0	0	0	0	0	100
1066	106623082	3	Esker	71.0584	45.848		PGM		2018-07-05		92.1448	0	0	0	7.85523	0	0	0	0	0	0	0	0	0	0	0	0	0	0	100
1066	106623082	4	Esker	63.3202	32.6899		PGM		2018-07-05		96.9711	0	0	0	3.02885	0	0	0	0	0	0	0	0	0	0	0	0	0	0	100
1066	106623082	5	Esker	85.1648	30.1119		PGM		2018-07-05		95.9902	0	0	0	4.00984	0	0	0	0	0	0	0	0	0	0	0	0	0	0	100
1066	106623095	1	Esker	31.5477	19.4734		Intact	Mutual	2018-07-06		12.7551	87.2449	0	0	0	0	0	0	0	0	0	0	0	0	0	0	0	0	0	100
1066	106623095	2	Esker	55.8676	48.6606		PGM		2018-07-06		94.0863	0	0	0	5.91366	0	0	0	0	0	0	0	0	0	0	0	0	0	0	100
1066	106623095	3	Esker	70.9177	40.5831		PGM		2018-07-06		98.7998	0	0	0	1.20023	0	0	0	0	0	0	0	0	0	0	0	0	0	0	100
1066	106623121	1	Esker	34.79	17.7207		Intact	Intergranular	2018-07-26		15.4708	83.9075	0	0.621654	0	0	0	0	0	0	0	0	0	0	0	0	0	0	0	100
1066	106623121	2	Esker	71.4731	68.7802		Modified		2018-08-01		7.55268	91.1907		1.25666	0					0										100
1066	106623191	1	Esker	61.9852	23.1975		Intact	Remobilized	2018-07-14		0	100	0	0	0	0	0	0	0	0	0	0	0	0	0	0	0	0	0	100
1066	106623191	2	Esker	19.8094	15.0328		Intact	Intergranular	2018-07-14		6.28139	93.7186	0	0	0	0	0	0	0	0	0	0	0	0	0	0	0	0	0	100
1066	106624088	1	Esker	95.4306	64.3754		Modifié		2018-11-30		1.07862	98.9214	0	0	0	0	0	0	0	0	0	0	0	0	0	0	0	0	0	100
1066	106624098	1	Esker	35.3756	24.3789		Modifié		2018-10-26		6.14812	93.8519	0	0	0	0	0	0	0	0	0	0	0	0	0	0	0	0	0	100
1101	110120197	1	Esker	302	223		Remodelé		2016-04-11		2.81	97.19	0	0		0		0	0	0		0	0	0	0	0	0		0	100
1101	110120197	2	Esker	251	139		Remodelé		2016-04-11		4.92	95.08	0	0		0		0	0	0		0	0	0	0	0	0		0	100
1101	110120321	1	Esker	144	118		Remodelé		2016-04-11		0	100	0	0		0		0	0	0		0	0	0	0	0	0		0	100
1101	110120438	1	Esker	207	163		Remodelé		2016-04-11		6.28	93.72	0	0		0		0	0	0		0	0	0	0	0	0		0	100
1101	110120438	2	Esker	74.7	55.8		Remodelé		2016-04-11		3.31	96.69	0	0		0		0	0	0		0	0	0	0	0	0		0	100
1101	110120438	3	Esker	155	140		Remodelé		2016-04-11		1.72	98.28	0	0		0		0	0	0		0	0	0	0	0	0		0	100
1101	110120438	4	Esker	182	142		Remodelé		2016-04-11		3.94	96.06	0	0		0		0	0	0		0	0	0	0	0	0		0	100
1101	110120438	5	Esker	169	146		Remodelé		2016-04-11		3.34	96.66	0	0		0		0	0	0		0	0	0	0	0	0		0	100
1101	110120438	6	Esker	208	149		Remodelé		2016-04-11		2.43	97.57	0	0		0		0	0	0		0	0	0	0	0	0		0	100
1101	110120459	1	Esker	152	39.3		Remodelé		2016-04-11		0	100	0	0		0		0	0	0		0	0	0	0	0	0		0	100
1101	110120469	1	Esker	45.6	35.7		Remodelé		2016-04-11		0	100	0	0		0		0	0	0		0	0	0	0	0	0		0	100
1101	110120469	2	Esker	181	135		Modifié		2016-04-11		0	100	0	0		0		0	0	0		0	0	0	0	0	0		0	100
1101	110120469	3	Esker	101	73.6		Modifié		2016-04-11		8.32	91.68	0	0		0		0	0	0		0	0	0	0	0	0		0	100
1101	110120526	1	Esker	336	174		Remodelé		2016-04-11		0	100	0	0		0		0	0	0		0	0	0	0	0	0		0	100
1101	110120526	2	Esker	146	63.9		Remodelé		2016-04-11		17.2	82.8	0	0		0		0	0	0		0	0	0	0	0	0		0	100
1101	110120526	3	Esker	256	97.8		Remodelé		2016-04-11		2.23	97.77	0	0		0		0	0	0		0	0	0	0	0	0		0	100
1101	110120526	4	Esker	54	38.2		Intact	Cristallin	2016-04-06		3.47887	96.5211	0	0		0		0	0	0		0	0	0	0	0	0		0	100
1101	110120532	1	Esker	227	135		Modifié		2016-04-11		7.14	92.86	0	0		0		0	0	0		0	0	0	0	0	0		0	100
1101	110120551	1	Esker	193	126		Remodelé		2016-04-11		3.98	96.02	0	0		0		0	0	0		0	0	0	0	0	0		0	100
1101	110120551	2	Esker	108	78.9		Remodelé		2016-04-11		2.54	97.46	0	0		0		0	0	0		0	0	0	0	0	0		0	100
1101	110120553	1	Esker	195	154		Remodelé		2016-04-11		1.97	98.03	0	0		0		0	0	0		0	0	0	0	0	0		0	100
1101	110120553	2	Esker	266	111		Remodelé		2016-04-11		9.47	90.53	0	0		0		0	0	0		0	0	0	0	0	0		0	100
1101	110120553	3	Esker	188	118		Remodelé		2016-04-11		8.31	91.69	0	0		0		0	0	0		0	0	0	0	0	0		0	100
1101	110120560	1	Esker	125	116		Remodelé		2016-04-11		3.39	96.61	0	0		0		0	0	0		0	0	0	0	0	0		0	100
1101	110120560	2	Esker	143	72.3		Modifié		2016-04-11		4.11	95.89	0	0		0		0	0	0		0	0	0	0	0	0		0	100
1101	110120560	3	Esker	175	107		Modifié		2016-04-11		1.92	98.08	0	0		0		0	0	0		0	0	0	0	0	0		0	100
1101	110120560	4	Esker	83.9	50.2		Modifié		2016-04-11		0	100	0	0		0		0	0	0		0	0	0	0	0	0		0	100
1101	110120560	5	Esker	58.2	40.1		Remodelé		2016-04-04		5.46485	94.5352	0	0		0		0	0	0		0	0	0	0	0	0		0	100
1101	110120607	1	Esker	153	118		Modifié		2016-04-11		4.83	95.17	0	0		0		0	0	0		0	0	0	0	0	0		0	100
1101	110120607	2	Esker	142	98.2		Modifié		2016-04-11		0	100	0	0		0		0	0	0		0	0	0	0	0	0		0	100
1101	110120607	3	Esker	42.5	37.1		Intact	Mutuel	2016-03-30		6.56495	87.8779	0	0		0		0	0	0		0	0	0	0	0	0		5.55711	100
1101	110120607	4	Esker	12.1	10.6		Intact	Mutuel	2016-03-30		10.0422	89.9578	0	0		0		0	0	0		0	0	0	0	0	0		0	100
1101	110120628	1	Esker	44.6	27.4		Remodelé		2016-03-30		0	94.4957	0	0		0		0	0	0		0	0	0	0	0	0		5.50427	100
1170	117020251	1	Esker	133.2	119.872		Modifié		2017-06-16		8.06	91.94	0		0	0	0	0	0	0	0	0	0	0	0	0	0		0	100
1170	117020260	1	Esker	28.1748	19.3589		Intact	Intergranulaire	2017-07-07		3.45009	96.5499	0		0	0	0	0	0	0	0	0	0	0	0	0	0	0	0	100
1170	117020260	2	Esker	25.3992	13.81		Intact	Remobilisé	2017-07-07		6.30361	93.6964	0		0	0	0	0	0	0	0	0	0	0	0	0	0	0	0	100
1170	117020305	1	Esker	66.7704	25.8376		Remodelé		2017-07-18		1.77494	98.2251	0		0	0	0	0	0	0	0	0	0	0	0	0	0	0	0	100
1170	117020305	2	Esker	53.6674	32.4305		Remodelé		2017-07-18		3.49401	96.506	0		0	0	0	0	0	0	0	0	0	0	0	0	0	0	0	100
1170	117020305	3	Esker	37.7759	14.7798		Intact	Intergranulaire	2017-07-18		4.82422	95.1758	0		0	0	0	0	0	0	0	0	0	0	0	0	0	0	0	100
1170	117020305	4	Esker	44.2562	41.1724		Modifié		2017-07-18		6.7061	93.2939	0		0	0	0	0	0	0	0	0	0	0	0	0	0	0	0	100
1170	117020305	5	Esker	56.6417	43.2199		Remodelé		2017-07-18		2.35287	97.6471	0		0	0	0	0	0	0	0	0	0	0	0	0	0	0	0	100
1170	117020310	1	Esker	36.8623	17.2037		Intact	Intergranulaire	2017-07-19		10.9524	89.0476	0		0	0	0	0	0	0	0	0	0	0	0	0	0	0	0	100
1170	117020310	2	Esker	155.994	151.162		Remodelé		2017-07-11		4.65	95.35	0		0	0	0	0	0	0	0	0	0	0	0	0	0		0	100
1170	117020320	1	Esker	25.9153	10.8493		Intact	Intergranulaire	2017-07-20		5.75023	94.2498	0		0	0	0	0	0	0	0	0	0	0	0	0	0	0	0	100
1170	117020320	2	Esker	109.095	84.9102		Remodelé		2017-07-11		0	100	0		0	0	0	0	0	0	0	0	0	0	0	0	0		0	100
1226	122620006	1	Esker	65.6731	38.6614		Intact	Intergranulaire	2018-07-19		12.7607	87.2393	0	0	0	0	0	0	0	0	0	0	0	0	0	0	0	0	0	100
1226	122620011	1	Esker	49.7918	36.4917		Remodelé		2018-07-20		0	100	0	0	0	0	0	0	0	0	0	0	0	0	0	0	0	0	0	100
1226	122620011	2	Esker	28.8995	22.0417		Intact	Remobilisé	2018-07-20		13.3761	86.6239	0	0	0	0	0	0	0	0	0	0	0	0	0	0	0	0	0	100
1226	122620023	1	Esker	34.3216	29.7839		Intact	Intergranulaire	2018-07-22		32.0975	67.9025	0	0	0	0	0	0	0	0	0	0	0	0	0	0	0	0	0	100
1226	122620039	1	Esker	78.1463	47.0584		Modifié		2018-10-04		17.1196	82.8804	0	0	0	0	0	0	0	0	0	0	0	0	0	0	0	0	0	100
1226	122620052	1	Esker	163.088	135.02		Modifié		2018-10-04		9.60758	90.3924	0	0	0	0	0	0	0	0	0	0	0	0	0	0	0	0	0	100
1226	122620061	1	Esker	130.416	126.411		Modifié		2018-10-04		4.85844	95.1416	0	0	0	0	0	0	0	0	0	0	0	0	0	0	0	0	0	100
1226	122620061	2	Esker	172.666	107.303		Modifié		2018-10-04		2.7815	97.2185	0	0	0	0	0	0	0	0	0	0	0	0	0	0	0	0	0	100
1226	122620061	3	Esker	191.521	149.539		Modifié		2018-10-04		11.0762	88.9238	0	0	0	0	0	0	0	0	0	0	0	0	0	0	0	0	0	100
1226	122620080	1	Esker	65.9901	53.3597		Modifié		2018-10-04		13.9402	86.0598	0	0	0	0	0	0	0	0	0	0	0	0	0	0	0	0	0	100
1226	122620098	1	Esker	21.5294	16.3362		Intact	Cristallin	2018-08-07		24.5031	74.685	0	0.811929	0	0	0	0	0	0	0	0	0	0	0	0	0	0	0	100
1226	122620098	2	Esker	239.655	156.03		Modifié		2018-10-04		3.41157	96.5884	0	0	0	0	0	0	0	0	0	0	0	0	0	0	0	0	0	100
1226	122620103	1	Esker	198.084	93.1411		Modifié		2018-10-04		0	100	0	0	0	0	0	0	0	0	0	0	0	0	0	0	0	0	0	100
1226	122620108	1	Esker	67.7446	48.6738		Intact	Cristallin	2018-08-09		7.10284	91.8538	0	1.04332	0	0	0	0	0	0	0	0	0	0	0	0	0	0	0	100
1226	122620122	1	Esker	32.4922	19.4685		Intact	Intergranulaire	2018-08-10		33.1766	66.2233	0	0.600104	0	0	0	0	0	0	0	0	0	0	0	0	0	0	0	100
1226	122620129	1	Esker	72.9353	45.7973		Modifié		2018-08-13		1.15026	98.8497	0	0	0	0	0	0	0	0	0	0	0	0	0	0	0	0	0	100
1226	122620129	2	Esker	297.488	244.567		Modifié		2018-10-04		0	100	0	0	0	0	0	0	0	0	0	0	0	0	0	0	0	0	0	100
1226	122620129	3	Esker	174.389	123.134		Modifié		2018-10-04		4.39642	95.6036	0	0	0	0	0	0	0	0	0	0	0	0	0	0	0	0	0	100
1226	122620147	1	Esker	136.65	56.957		Modifié		2018-10-04		7.29578	92.7042	0	0	0	0	0	0	0	0	0	0	0	0	0	0	0	0	0	100
1226	122620147	2	Esker	80.4652	53.0554		Modifié		2018-10-04		3.34888	96.6511	0	0	0	0	0	0	0	0	0	0	0	0	0	0	0	0	0	100
1226	122620147	3	Esker	183.551	74.1		Modifié		2018-10-04		0	100	0	0	0	0	0	0	0	0	0	0	0	0	0	0	0	0	0	100
1226	122620162	1	Esker	209.304	107.301		Modifié		2018-10-04		3.27681	96.7232	0	0	0	0	0	0	0	0	0	0	0	0	0	0	0	0	0	100
1226	122620162	2	Esker	265.491	247.445		Remodelé		2018-10-04		0	100	0	0	0	0	0	0	0	0	0	0	0	0	0	0	0	0	0	100
1226	122620230	1	Esker	72.2816	38.1119		Modifié		2018-10-04		0	100	0	0	0	0	0	0	0	0	0	0	0	0	0	0	0	0	0	100
1226	122620230	2	Esker	100.311	59.2083		Modifié		2018-10-04		8.09807	91.9019	0	0	0	0	0	0	0	0	0	0	0	0	0	0	0	0	0	100
1226	122620236	1	Esker	43.0969	28.673		Modifié		2018-09-02		2.5896	97.4104	0	0	0	0	0	0	0	0	0	0	0	0	0	0	0	0	0	100
1226	122620236	2	Esker	34.7856	27.3816		Modifié		2018-09-02		6.20827	93.7917	0	0	0	0	0	0	0	0	0	0	0	0	0	0	0	0	0	100
1226	122620236	3	Esker	31.3831	23.0321		Modifié		2018-09-02		5.12779	94.8722	0	0	0	0	0	0	0	0	0	0	0	0	0	0	0	0	0	100
1226	122620236	4	Esker	41.9073	30.0232		Intact	Intergranulaire	2018-09-02		15.0305	84.9695	0	0	0	0	0	0	0	0	0	0	0	0	0	0	0	0	0	100
1226	122620236	5	Esker	95.4627	63.6703		Modifié		2018-10-04		11.2419	88.7581	0	0	0	0	0	0	0	0	0	0	0	0	0	0	0	0	0	100
1226	122620240	1	Esker	56.3974	27.1805		Intact	Cristallin	2018-09-02		0	100	0	0	0	0	0	0	0	0	0	0	0	0	0	0	0	0	0	100
1226	122620240	2	Esker	69.8512	47.6112		Modifié		2018-09-02		3.79822	96.2018	0	0	0	0	0	0	0	0	0	0	0	0	0	0	0	0	0	100
1226	122620240	3	Esker	65.3173	49.7048		Modifié		2018-09-02		4.80058	95.1994	0	0	0	0	0	0	0	0	0	0	0	0	0	0	0	0	0	100
1226	122620240	4	Esker	113.957	73.2614		Modifié		2018-10-04		4.33494	95.6651	0	0	0	0	0	0	0	0	0	0	0	0	0	0	0	0	0	100
1226	122620240	5	Esker	141.725	121.506		Modifié		2018-10-04		6.08529	93.9147	0	0	0	0	0	0	0	0	0	0	0	0	0	0	0	0	0	100
1226	122620240	6	Esker	90.5267	85.4666		Modifié		2018-10-04		2.78161	97.2184	0	0	0	0	0	0	0	0	0	0	0	0	0	0	0	0	0	100
1226	122620254	1	Esker	98.667	54.2449		Modifié		2018-10-04		3.30311	96.6969	0	0	0	0	0	0	0	0	0	0	0	0	0	0	0	0	0	100
1226	122620261	1	Esker	66.7194	40.0127		Intact	Intergranulaire	2018-09-03		1.19079	98.8092	0	0	0	0	0	0	0	0	0	0	0	0	0	0	0	0	0	100
1226	122620261	2	Esker	33.1689	30.51		Modifié		2018-09-03		0	31.193	0	0	0	7.68955	0	0	0	54.6879	0	6.42963	0	0	0	0	0	0	0	100
1226	122620261	3	Esker	36.8583	22.1829		Intact	Intergranulaire	2018-09-03		17.5002	82.4998	0	0	0	0	0	0	0	0	0	0	0	0	0	0	0	0	0	100
1226	122620261	4	Esker	372.812	181.905		Modifié		2018-10-04		7.05729	92.9427	0	0	0	0	0	0	0	0	0	0	0	0	0	0	0	0	0	100
1226	122620261	5	Esker	71.3219	63.5064		Modifié		2018-10-04		0	100	0	0	0	0	0	0	0	0	0	0	0	0	0	0	0	0	0	100
1226	122620261	6	Esker	88.344	52.0901		Remodelé		2018-10-04		11.1324	88.8676	0	0	0	0	0	0	0	0	0	0	0	0	0	0	0	0	0	100
1226	122620263	1	Esker	86.2947	72.1286		Remodelé		2018-10-04		0	100	0	0	0	0	0	0	0	0	0	0	0	0	0	0	0	0	0	100
1226	122620283	1	Esker	82.3203	42.1155		Remodelé		2018-09-06		2.51003	97.49	0	0	0	0	0	0	0	0	0	0	0	0	0	0	0	0	0	100
1226	122620283	2	Esker	173.044	120.186		Modifié		2018-10-04		2.15606	97.8439	0	0	0	0	0	0	0	0	0	0	0	0	0	0	0	0	0	100
1226	122620283	3	Esker	156.192	92.2471		Modifié		2018-10-04		5.02278	94.9772	0	0	0	0	0	0	0	0	0	0	0	0	0	0	0	0	0	100
1226	122620283	4	Esker	203.109	88.32		Modifié		2018-10-04		3.93352	96.0665	0	0	0	0	0	0	0	0	0	0	0	0	0	0	0	0	0	100
1226	122620288	1	Esker	85.4884	26.2496		Modifié		2018-09-05		0	100	0	0	0	0	0	0	0	0	0	0	0	0	0	0	0	0	0	100
1298	129820003	1	Esker	35.1796	31.3179	33.4729	Remodelé		2019-07-16		2.93821	97.0618	0	0	0	0	0	0	0	0	0	0	0	0	0	0	0	0	0	100
1298	129820007	1	Esker	25.2696	22.3816	24.2238	Modifié		2019-07-16		11.8396	88.1604	0	0	0	0	0	0	0	0	0	0	0	0	0	0	0	0	0	100
1298	129820007	2	Esker	200.101	88.2014	116.481	Modifié				2.17686	97.8231	0	0	0	0	0	0	0	0	0	0	0	0	0	0	0	0	0	100
1298	129820014	1	Esker	42.7207	40.678	41.7903	Remodelé		2019-07-16		13.1038	86.8962	0	0	0	0	0	0	0	0	0	0	0	0	0	0	0	0	0	100
1298	129820020	1	Esker	60.7306	41.9997	47.4933	Intact	Intergranulaire	2019-07-17		28.3523	71.6477	0	0	0	0	0	0	0	0	0	0	0	0	0	0	0	0	0	100
1298	129820020	2	Esker	52.9346	45.8754	48.0849	Intact	Cristallin	2019-07-17		15.0122	84.9878	0	0	0	0	0	0	0	0	0	0	0	0	0	0	0	0	0	100
1298	129820020	3	Esker	39.8086	20.4587	27.5918	Intact	Cristallin	2019-07-17		23.74	76.26	0	0	0	0	0	0	0	0	0	0	0	0	0	0	0	0	0	100
1298	129820020	4	Esker	258.823	145.124	192.44	Modifié				0	100	0	0	0	0	0	0	0	0	0	0	0	0	0	0	0	0	0	100
1298	129820022	1	Esker	91.6409	72.309	79.6965	Remodelé				0	100	0	0	0	0	0	0	0	0	0	0	0	0	0	0	0	0	0	100
1298	129820025	1	Esker	160.946	79.552	102.674	Intact	Remobilisé			2.56597	97.434	0	0	0	0	0	0	0	0	0	0	0	0	0	0	0	0	0	100
1298	129820033	1	Esker	61.3426	34.2903	44.0916	Modifié		2019-07-17		12.8857	86.0776	0	0	1.03664	0	0	0	0	0	0	0	0	0	0	0	0	0	0	100
1298	129820033	2	Esker	30.8032	28.6866	30.1284	Remodelé		2019-07-17		3.02082	96.2852	0	0	0.693972	0	0	0	0	0	0	0	0	0	0	0	0	0	0	100
1298	129820033	3	Esker	24.1549	21.7001	20.2026	Modifié		2019-08-12		0	97.3459	0	0	0	0	0	0	0	2.65414	0	0	0	0	0	0	0	0	0	100
1298	129820033	4	Esker	30.7914	16.5773	22.2921	Modifié		2019-08-12		13.5163	86.4837	0	0	0	0	0	0	0	0	0	0	0	0	0	0	0	0	0	100
1298	129820038	1	Esker	206.325	121.61	160.5	Modifié				2.05785	97.9422	0	0	0	0	0	0	0	0	0	0	0	0	0	0	0	0	0	100
1298	129820038	2	Esker	64.1004	48.1712	55.2251	Remodelé				12.2432	87.7568	0	0	0	0	0	0	0	0	0	0	0	0	0	0	0	0	0	100
1298	129820045	1	Esker	59.9015	26.6187	35.8196	Intact	Cristallin	2019-07-17		26.717	73.283	0	0	0	0	0	0	0	0	0	0	0	0	0	0	0	0	0	100
1298	129820047	1	Esker	70.0223	64.328	66.6005	Modifié				1.23679	98.7632	0	0	0	0	0	0	0	0	0	0	0	0	0	0	0	0	0	100
1298	129820048	1	Esker	95.8619	79.8808	85.1814	Modifié				0.949202	99.0508	0	0	0	0	0	0	0	0	0	0	0	0	0	0	0	0	0	100
1298	129820048	2	Esker	96.0292	84.7492	87.4613	Remodelé				4.76654	95.2335	0	0	0	0	0	0	0	0	0	0	0	0	0	0	0	0	0	100
1298	129820048	3	Esker	87.3191	79.8117	81.9376	Modifié				6.11725	93.8828	0	0	0	0	0	0	0	0	0	0	0	0	0	0	0	0	0	100
1334	133420006	1	Esker	48.6869	32.151	40.7182	Intact	Cristallin	2019-07-19		26.0912	73.9088	0	0	0	0	0	0	0	0	0	0	0	0	0	0	0	0	0	100
1334	133420006	2	Esker	152.857	145.478	136.805	Modifié		2019-12-11		9.66787	90.3321	0	0	0	0	0	0	0	0	0	0	0	0	0	0	0	0	0	100
1334	133420006	3	Esker	166.628	59.0777	86.7941	Remodelé		2019-12-11		0	100	0	0	0	0	0	0	0	0	0	0	0	0	0	0	0	0	0	100
1334	133420008	1	Esker	189.297	163.318	175.252	Remodelé		2019-12-11		3.60732	96.3927	0	0	0	0	0	0	0	0	0	0	0	0	0	0	0	0	0	100
1334	133420013	1	Esker	203.275	178.818	188.077	Modifié		2019-12-11		0	100	0	0	0	0	0	0	0	0	0	0	0	0	0	0	0	0	0	100
1334	133420013	2	Esker	78.0739	74.543	72.761	Modifié		2019-12-11		3.55238	96.4476	0	0	0	0	0	0	0	0	0	0	0	0	0	0	0	0	0	100
1334	133420013	3	Esker	86.7816	54.0149	64.8654	Modifié		2019-12-11		1.52879	98.4712	0	0	0	0	0	0	0	0	0	0	0	0	0	0	0	0	0	100
1334	133420013	4	Esker	79.3863	68.143	72.9389	Modifié		2019-12-11		11.8245	88.1755	0	0	0	0	0	0	0	0	0	0	0	0	0	0	0	0	0	100
1334	133420013	5	Esker	105.458	64.1371	74.0642	Modifié		2019-12-11		26.7058	73.2942	0	0	0	0	0	0	0	0	0	0	0	0	0	0	0	0	0	100
1334	133420013	6	Esker	100.481	55.789	70.8954	Modifié		2019-12-11		13.7274	86.2726	0	0	0	0	0	0	0	0	0	0	0	0	0	0	0	0	0	100
1334	133420013	7	Esker	100.683	55.9934	70.1436	Modifié		2019-12-11		1.62156	98.3784	0	0	0	0	0	0	0	0	0	0	0	0	0	0	0	0	0	100
1334	133420013	8	Esker	216.088	135.816	149.778	Modifié		2019-12-11		0	100	0	0	0	0	0	0	0	0	0	0	0	0	0	0	0	0	0	100
1334	133420013	9	Esker	249.49	149.757	173.244	Modifié		2019-12-11		0	99.0261	0	0	0.973872	0	0	0	0	0	0	0	0	0	0	0	0	0	0	100
1334	133420020	1	Esker	410.286	319.357	322.338	Modifié		2019-12-11		0	100	0	0	0	0	0	0	0	0	0	0	0	0	0	0	0	0	0	100
1334	133420064	1	Esker	47.5166	30.1637	38.1709	Modifié		2019-07-24		16.1832	83.8168	0	0	0	0	0	0	0	0	0	0	0	0	0	0	0	0	0	100
1334	133420064	2	Esker	50.6343	40.1537	36.2055	Intact	Remobilisé	2019-07-24		2.5147	97.4853	0	0	0	0	0	0	0	0	0	0	0	0	0	0	0	0	0	100
1334	133420064	3	Esker	178.635	128.816	153.116	Modifié		2019-12-11		1.61105	98.389	0	0	0	0	0	0	0	0	0	0	0	0	0	0	0	0	0	100
1334	133420064	4	Esker	381.282	153.641	223.338	Modifié		2019-12-11		0.69567	99.3043	0	0	0	0	0	0	0	0	0	0	0	0	0	0	0	0	0	100
1334	133420087	1	Esker	191.04	102.771	134.928	Modifié		2019-12-11		1.43111	98.5689	0	0	0	0	0	0	0	0	0	0	0	0	0	0	0	0	0	100
1334	133420087	2	Esker	63.5612	47.1846	51.7236	Remodelé		2019-12-11		12.2811	87.7189	0	0	0	0	0	0	0	0	0	0	0	0	0	0	0	0	0	100
1334	133420096	1	Esker	52.3945	32.4548	40.5775	Remodelé		2019-11-05		0	100	0	0	0	0	0	0	0	0	0	0	0	0	0	0	0	0	0	100
1334	133420107	1	Esker	16.1998	15.3362	15.687	Remodelé		2019-11-05		10.9797	89.0203	0	0	0	0	0	0	0	0	0	0	0	0	0	0	0	0	0	100
1334	133420107	2	Esker	27.4317	17.9809	22.2763	Modifié		2019-11-05		8.26767	91.7323	0	0	0	0	0	0	0	0	0	0	0	0	0	0	0	0	0	100
1334	133420107	3	Esker	49.783	44.7654	45.3773	Modifié		2019-11-05		1.22419	96.3274	0	0	0	0	0	0	0	0	0	0	0	0	0	2.44837	0	0	0	100
1334	133420155	1	Esker	29.3955	20.2582	21.9457	Intact	Remobilisé	2019-12-09		0	100	0	0	0	0	0	0	0	0	0	0	0	0	0	0	0	0	0	100
1334	133420155	2	Esker	75.1167	45.4665	56.7906	Remodelé		2019-12-11		2.83349	97.1665	0	0	0	0	0	0	0	0	0	0	0	0	0	0	0	0	0	100
1334	133420155	3	Esker	155.878	135.123	143.368	Modifié		2019-12-11		15.9556	84.0444	0	0	0	0	0	0	0	0	0	0	0	0	0	0	0	0	0	100
1334	133420155	4	Esker	115.478	101.004	110.192	Remodelé		2019-12-11		0	100	0	0	0	0	0	0	0	0	0	0	0	0	0	0	0	0	0	100
1356	135620032	1	Esker	37.4244	36.7421	36.0916	Intact	Crystalline	2020-02-03		23.9278	76.0722	0	0	0	0	0	0	0	0	0	0	0	0	0	0	0	0	0	100
1356	135620055	1	Esker	32.0357	22.63	26.8682	Modified		2020-02-07		4.29	95.71	0	0	0	0	0	0	0	0	0	0	0	0	0	0	0	0	0	100
1356	135620068	1	Esker	38.2413	37.0775	37.4946	Reshaped		2020-02-10		5.12438	94.8756	0	0	0	0	0	0	0	0	0	0	0	0	0	0	0	0	0	100
1356	135620070	1	Esker	143.246	45.3577	70.2262	Intact	Remobilized	2020-02-18		2.98928	97.0107	0	0	0	0	0	0	0	0	0	0	0	0	0	0	0	0	0	100
1356	135620070	2	Esker	37.4557	24.4438	28.9342	Intact	Crystalline	2020-02-18		6.25652	93.7435	0	0	0	0	0	0	0	0	0	0	0	0	0	0	0	0	0	100
1356	135620099	1	Esker	129.079	95.3558	106.232	Reshaped		2020-05-27		2.29162	97.7084	0	0	0	0	0	0	0	0	0	0	0	0	0	0	0	0	0	100
1356	135620109	1	Esker	67.3627	30.4416	42.6896	Modified		2020-03-05		0.769879	99.2301	0	0	0	0	0	0	0	0	0	0	0	0	0	0	0	0	0	100
1356	135620113	1	Esker	49.7276	20.9254	32.1224	Intact	Crystalline	2020-03-05		17.3748	82.6252	0	0	0	0	0	0	0	0	0	0	0	0	0	0	0	0	0	100
1356	135620129	1	Esker	400.103	243.953	269.086	Modified		2020-05-27		0	100	0	0	0	0	0	0	0	0	0	0	0	0	0	0	0	0	0	100
1356	135620132	1	Esker	211.943	87.745	131.546	Intact	Remobilized	2020-05-27		18.8959	81.1041	0	0	0	0	0	0	0	0	0	0	0	0	0	0	0	0	0	100
1356	135620173	1	Esker	47.1569	33.2172	38.9272	Modified		2020-03-24		0	90.694	0	0	9.30599	0	0	0	0	0	0	0	0	0	0	0	0	0	0	100
1356	135620173	2	Esker	22.1962	17.891	19.8838	Intact	Crystalline	2020-03-24		30.632	69.368	0	0	0	0	0	0	0	0	0	0	0	0	0	0	0	0	0	100
1356	135620173	3	Esker	38.6664	26.8475	29.2341	Intact	Intergranular	2020-03-24		13.9592	86.0408	0	0	0	0	0	0	0	0	0	0	0	0	0	0	0	0	0	100
1356	135620173	4	Esker	247.107	135.909	174.094	Modified		2020-05-27		12.5548	87.4452	0	0	0	0	0	0	0	0	0	0	0	0	0	0	0	0	0	100
1356	135620185	1	Esker	24.6775	17.3075	20.0923	Intact	Mutual	2020-03-24		9.0076	90.9924	0	0	0	0	0	0	0	0	0	0	0	0	0	0	0	0	0	100
1356	135620197	1	Esker	17.4914	8.17877	11.8887	Intact	Crystalline	2020-05-05		12.1703	86.7869	0	0	1.04282	0	0	0	0	0	0	0	0	0	0	0	0	0	0	100
1356	135620197	2	Esker	16.6966	13.4068	14.0578	Intact	Intergranular	2020-05-05		2.37054	97.6295	0	0	0	0	0	0	0	0	0	0	0	0	0	0	0	0	0	100
1356	135620203	1	Esker	37.4617	28.7855	31.8076	Intact	Intergranular	2020-05-05		12.9984	87.0016	0	0	0	0	0	0	0	0	0	0	0	0	0	0	0	0	0	100
1356	135620203	2	Esker	39.7335	20.5897	27.2135	Intact	Crystalline	2020-05-05		48.4617	51.5383	0	0	0	0	0	0	0	0	0	0	0	0	0	0	0	0	0	100
1356	135620212	1	Esker	26.3662	19.0825	22.3809	Intact	Crystalline	2020-05-25		7.56512	92.4349	0	0	0	0	0	0	0	0	0	0	0	0	0	0	0	0	0	100
1356	135620212	2	Esker	36.1082	34.5094	34.3479	Intact	Crystalline	2020-05-25		13.254	86.746	0	0	0	0	0	0	0	0	0	0	0	0	0	0	0	0	0	100
1356	135620212	3	Esker	36.4889	29.8109	31.5768	Modified		2020-05-25		16.9215	83.0785	0	0	0	0	0	0	0	0	0	0	0	0	0	0	0	0	0	100
1356	135620212	4	Esker	48.0452	28.7117	34.1986	Intact	Intergranular	2020-05-25		5.0034	94.9966	0	0	0	0	0	0	0	0	0	0	0	0	0	0	0	0	0	100
1356	135620217	1	Esker	230.522	142.343	149.342	Modified		2020-05-27		0	100	0	0	0	0	0	0	0	0	0	0	0	0	0	0	0	0	0	100
1356	135620217	2	Esker	89.4638	79.0364	83.5697	Modified		2020-05-27		8.22157	91.7784	0	0	0	0	0	0	0	0	0	0	0	0	0	0	0	0	0	100
1356	135620226	1	Esker	34.4142	23.5274	27.0721	Intact	Intergranular	2020-05-26		0	100	0	0	0	0	0	0	0	0	0	0	0	0	0	0	0	0	0	100
1356	135621060	1	Esker	254.763	123.74	157.534	Modifié		2020-10-27		4.47746	94.2759	0	0	1.24662	0	0	0	0	0	0	0	0	0	0	0	0	0	0	100
1356	135621065	1	Esker	20.9482	15.8152	18.1477	Intact	Mutuel	2020-06-18		0	100	0	0	0	0	0	0	0	0	0	0	0	0	0	0	0	0	0	100
1356	135621077	1	Esker	33.8172	23.5243	27.2938	Intact	Intergranulaire	2020-06-18		11.4671	88.5329	0	0	0	0	0	0	0	0	0	0	0	0	0	0	0	0	0	100
1356	135621084	1	Esker	23.721	20.9821	21.3255	Modifié		2020-06-30		2.71926	97.2807	0	0	0	0	0	0	0	0	0	0	0	0	0	0	0	0	0	100
1356	135621094	1	Esker	32.3376	31.4647	31.9583	Modifié		2020-06-30		23.9077	76.0923	0	0	0	0	0	0	0	0	0	0	0	0	0	0	0	0	0	100
1356	135621099	1	Esker	41.8395	38.5164	39.9498	Intact	Intergranulaire	2020-06-30		3.21267	96.7873	0	0	0	0	0	0	0	0	0	0	0	0	0	0	0	0	0	100
1356	135621099	2	Esker	33.6536	19.1208	24.9703	Intact	Intergranulaire	2020-06-30		14.8267	85.1733	0	0	0	0	0	0	0	0	0	0	0	0	0	0	0	0	0	100
1356	135621102	1	Esker	109.773	32.0056	52.7236	Intact	Intergranulaire	2020-06-30		4.55141	95.4486	0	0	0	0	0	0	0	0	0	0	0	0	0	0	0	0	0	100
1356	135621104	1	Esker	37.4964	19.9077	26.9722	Modifié		2020-08-06		2.06338	97.9366	0	0	0	0	0	0	0	0	0	0	0	0	0	0	0	0	0	100
1356	135621104	2	Esker	187.522	100.739	140.102	Remodelé		2020-10-27		8.697	91.303	0	0	0	0	0	0	0	0	0	0	0	0	0	0	0	0	0	100
1356	135621106	1	Esker	17.3295	14.3762	15.2486	Intact	Intergranulaire	2020-08-06		25.8202	74.1798	0	0	0	0	0	0	0	0	0	0	0	0	0	0	0	0	0	100
1356	135621117	1	Esker	75.7871	47.6356	59.6665	Modifié		2020-10-27		0.94464	99.0554	0	0	0	0	0	0	0	0	0	0	0	0	0	0	0	0	0	100
1356	135621133	1	Esker	53.1249	32.9291	42.2599	Modifié		2020-08-11		3.65882	96.3412	0	0	0	0	0	0	0	0	0	0	0	0	0	0	0	0	0	100
1356	135621139	1	Esker	34.3769	13.9487	20.1104	Intact	Intergranulaire	2020-08-11		0	100	0	0	0	0	0	0	0	0	0	0	0	0	0	0	0	0	0	100
1356	135621143	1	Esker	52.7456	47.6306	49.6234	Modifié		2020-10-27		4.22565	95.7744	0	0	0	0	0	0	0	0	0	0	0	0	0	0	0	0	0	100
1066	106622050	3	Esker	145.436	94.6653		Modifié				0	100	0	0	0	0	0	0	0	0	0	0	0	0	0	0	0	0	0	100
1226	122620023	a	Esker	38.8278	27.8019		PGM		2018-07-22		77.5184	0	0	0	0	0	22.4816	0	0	0	0	0	0	0	0	0	0	0	0	100
1366	136620001	1	Roche	30.6377	20.304	23.7506	Modified		2020-06-04		0	100	0	0	0	0	0	0	0	0	0	0	0	0	0	0	0	0	0	100
1366	136620001	10	Roche	46.6407	28.6634	35.7232	Pristine	Remobilized	2020-06-04		2.60357	94.0483	0	0	0.587825	0	0	0	0	2.76029	0	0	0	0	0	0	0	0	0	100
1366	136620001	100	Roche	21.5562	20.7675	21.291	Reshaped		2020-06-04		1.26942	98.7306	0	0	0	0	0	0	0	0	0	0	0	0	0	0	0	0	0	100
1366	136620001	1000	Roche	39.4489	19.5749	27.2117	Modified			0	0	0	0	0	0	0	0	0	0	0	0	0	0	0	0	0	0	0	0	0
1366	136620001	1001	Roche	54.5949	30.9775	39.9126	Modified			0	0	0	0	0	0	0	0	0	0	0	0	0	0	0	0	0	0	0	0	0
1366	136620001	1002	Roche	36.4835	18.6612	24.1128	Modified			0	0	0	0	0	0	0	0	0	0	0	0	0	0	0	0	0	0	0	0	0
1366	136620001	1003	Roche	26.3922	23.1919	24.3991	Modified			0	0	0	0	0	0	0	0	0	0	0	0	0	0	0	0	0	0	0	0	0
1366	136620001	1004	Roche	31.0697	17.6248	21.8785	Modified			0	0	0	0	0	0	0	0	0	0	0	0	0	0	0	0	0	0	0	0	0
1366	136620001	1005	Roche	24.193	18.2094	21.1528	Modified			0	0	0	0	0	0	0	0	0	0	0	0	0	0	0	0	0	0	0	0	0
1366	136620001	1006	Roche	33.6513	32.815	33.2371	Modified			0	0	0	0	0	0	0	0	0	0	0	0	0	0	0	0	0	0	0	0	0
1366	136620001	1007	Roche	46.4538	34.2948	39.1308	Modified			0	0	0	0	0	0	0	0	0	0	0	0	0	0	0	0	0	0	0	0	0
1366	136620001	1008	Roche	59.0624	27.9766	37.1513	Modified			0	0	0	0	0	0	0	0	0	0	0	0	0	0	0	0	0	0	0	0	0
1366	136620001	1009	Roche	41.1078	22.4548	29.3117	Pristine	Remobilized		0	0	0	0	0	0	0	0	0	0	0	0	0	0	0	0	0	0	0	0	0
1366	136620001	101	Roche	40.3444	33.1079	36.4097	Reshaped			0	0	0	0	0	0	0	0	0	0	0	0	0	0	0	0	0	0	0	0	0
1366	136620001	1010	Roche	38.3347	20.2255	26.1811	Pristine	Intergranular		0	0	0	0	0	0	0	0	0	0	0	0	0	0	0	0	0	0	0	0	0
1366	136620001	1011	Roche	27.4747	22.9986	25.0322	Pristine	Crystalline		0	0	0	0	0	0	0	0	0	0	0	0	0	0	0	0	0	0	0	0	0
1366	136620001	1012	Roche	32.669	17.8464	21.8722	Modified			0	0	0	0	0	0	0	0	0	0	0	0	0	0	0	0	0	0	0	0	0
1366	136620001	1013	Roche	21.8206	19.6239	20.174	Modified			0	0	0	0	0	0	0	0	0	0	0	0	0	0	0	0	0	0	0	0	0
1366	136620001	1014	Roche	31.7862	26.5814	28.1156	Pristine	Crystalline		0	0	0	0	0	0	0	0	0	0	0	0	0	0	0	0	0	0	0	0	0
1366	136620001	1015	Roche	26.1834	25.902	25.4347	Modified			0	0	0	0	0	0	0	0	0	0	0	0	0	0	0	0	0	0	0	0	0
1366	136620001	1016	Roche	35.8152	20.8369	26.1975	Modified			0	0	0	0	0	0	0	0	0	0	0	0	0	0	0	0	0	0	0	0	0
1366	136620001	1017	Roche	28.6761	17.6404	23.2943	Pristine	Crystalline		0	0	0	0	0	0	0	0	0	0	0	0	0	0	0	0	0	0	0	0	0
1366	136620001	1018	Roche	32.8177	14.7899	22.4734	Modified			0	0	0	0	0	0	0	0	0	0	0	0	0	0	0	0	0	0	0	0	0
1366	136620001	1019	Roche	44.6835	23.2957	29.9886	Modified			0	0	0	0	0	0	0	0	0	0	0	0	0	0	0	0	0	0	0	0	0
1366	136620001	102	Roche	32.655	28.3296	29.5296	Modified			0	0	0	0	0	0	0	0	0	0	0	0	0	0	0	0	0	0	0	0	0
1366	136620001	1020	Roche	20.9185	14.785	17.1314	Pristine	Intergranular		0	0	0	0	0	0	0	0	0	0	0	0	0	0	0	0	0	0	0	0	0
1366	136620001	1021	Roche	27.9321	15.8119	19.7272	Pristine	Intergranular		0	0	0	0	0	0	0	0	0	0	0	0	0	0	0	0	0	0	0	0	0
1366	136620001	1022	Roche	25.1805	18.9759	22.1262	Modified			0	0	0	0	0	0	0	0	0	0	0	0	0	0	0	0	0	0	0	0	0
1366	136620001	1023	Roche	33.1247	26.2292	29.6684	Modified			0	0	0	0	0	0	0	0	0	0	0	0	0	0	0	0	0	0	0	0	0
1366	136620001	1024	Roche	33.7398	25.5722	26.3866	Pristine	Remobilized		0	0	0	0	0	0	0	0	0	0	0	0	0	0	0	0	0	0	0	0	0
1366	136620001	1025	Roche	20.8131	11.7889	14.4281	Pristine	Intergranular		0	0	0	0	0	0	0	0	0	0	0	0	0	0	0	0	0	0	0	0	0
1366	136620001	1026	Roche	28.652	15.3211	20.6466	Reshaped			0	0	0	0	0	0	0	0	0	0	0	0	0	0	0	0	0	0	0	0	0
1366	136620001	1027	Roche	44.2645	25.9137	33.105	Pristine	Crystalline		0	0	0	0	0	0	0	0	0	0	0	0	0	0	0	0	0	0	0	0	0
1366	136620001	1028	Roche	26.9789	22.6001	23.0133	Modified			0	0	0	0	0	0	0	0	0	0	0	0	0	0	0	0	0	0	0	0	0
1366	136620001	1029	Roche	24.4713	23.3996	23.2771	Modified			0	0	0	0	0	0	0	0	0	0	0	0	0	0	0	0	0	0	0	0	0
1366	136620001	103	Roche	19.0494	16.2384	15.3847	Pristine	Crystalline		0	0	0	0	0	0	0	0	0	0	0	0	0	0	0	0	0	0	0	0	0
1366	136620001	1030	Roche	40.5539	22.5744	28.2358	Modified			0	0	0	0	0	0	0	0	0	0	0	0	0	0	0	0	0	0	0	0	0
1366	136620001	1031	Roche	54.7173	27.8356	34.9819	Pristine	Remobilized		0	0	0	0	0	0	0	0	0	0	0	0	0	0	0	0	0	0	0	0	0
1366	136620001	1032	Roche	38.7598	34.2708	36.1557	Reshaped			0	0	0	0	0	0	0	0	0	0	0	0	0	0	0	0	0	0	0	0	0
1366	136620001	1033	Roche	22.8803	15.0421	18.239	Modified			0	0	0	0	0	0	0	0	0	0	0	0	0	0	0	0	0	0	0	0	0
1366	136620001	1034	Roche	31.3179	24.6192	27.0792	Modified			0	0	0	0	0	0	0	0	0	0	0	0	0	0	0	0	0	0	0	0	0
1366	136620001	1035	Roche	37.5793	26.146	29.5852	Modified			0	0	0	0	0	0	0	0	0	0	0	0	0	0	0	0	0	0	0	0	0
1366	136620001	1036	Roche	34.1533	29.0321	28.6121	Modified			0	0	0	0	0	0	0	0	0	0	0	0	0	0	0	0	0	0	0	0	0
1366	136620001	1037	Roche	32.9458	20.734	25.2256	Modified			0	0	0	0	0	0	0	0	0	0	0	0	0	0	0	0	0	0	0	0	0
1366	136620001	1038	Roche	49.2973	29.7772	35.326	Modified			0	0	0	0	0	0	0	0	0	0	0	0	0	0	0	0	0	0	0	0	0
1366	136620001	1039	Roche	30.5515	24.5487	26.8719	Modified			0	0	0	0	0	0	0	0	0	0	0	0	0	0	0	0	0	0	0	0	0
1366	136620001	104	Roche	31.0728	29.0001	30.2494	Modified			0	0	0	0	0	0	0	0	0	0	0	0	0	0	0	0	0	0	0	0	0
1366	136620001	1040	Roche	37.6247	33.7248	35.3654	Modified			0	0	0	0	0	0	0	0	0	0	0	0	0	0	0	0	0	0	0	0	0
1366	136620001	1041	Roche	20.4256	13.8494	16.5262	Pristine	Mutual		0	0	0	0	0	0	0	0	0	0	0	0	0	0	0	0	0	0	0	0	0
1366	136620001	1042	Roche	24.5453	23.2258	23.092	Modified			0	0	0	0	0	0	0	0	0	0	0	0	0	0	0	0	0	0	0	0	0
1366	136620001	1043	Roche	28.0613	21.5546	23.8429	Pristine	Crystalline		0	0	0	0	0	0	0	0	0	0	0	0	0	0	0	0	0	0	0	0	0
1366	136620001	1044	Roche	26.6278	14.0211	17.659	Pristine	Intergranular		0	0	0	0	0	0	0	0	0	0	0	0	0	0	0	0	0	0	0	0	0
1366	136620001	1045	Roche	27.292	14.7635	19.2197	Pristine	Intergranular		0	0	0	0	0	0	0	0	0	0	0	0	0	0	0	0	0	0	0	0	0
1366	136620001	1046	Roche	24.4578	21.6841	23.3127	Modified			0	0	0	0	0	0	0	0	0	0	0	0	0	0	0	0	0	0	0	0	0
1366	136620001	1047	Roche	26.0703	24.8383	24.0872	Modified			0	0	0	0	0	0	0	0	0	0	0	0	0	0	0	0	0	0	0	0	0
1366	136620001	1048	Roche	21.3392	13.3598	16.3617	Pristine	Intergranular		0	0	0	0	0	0	0	0	0	0	0	0	0	0	0	0	0	0	0	0	0
1366	136620001	1049	Roche	24.823	22.4666	22.9161	Modified			0	0	0	0	0	0	0	0	0	0	0	0	0	0	0	0	0	0	0	0	0
1366	136620001	105	Roche	45.5946	31.0712	35.8706	Modified			0	0	0	0	0	0	0	0	0	0	0	0	0	0	0	0	0	0	0	0	0
1366	136620001	1050	Roche	19.8189	16.4277	18.2652	Reshaped			0	0	0	0	0	0	0	0	0	0	0	0	0	0	0	0	0	0	0	0	0
1366	136620001	1051	Roche	19.4202	14.5162	16.1877	Pristine	Intergranular		0	0	0	0	0	0	0	0	0	0	0	0	0	0	0	0	0	0	0	0	0
1366	136620001	1052	Roche	34.1168	28.7335	29.9855	Modified			0	0	0	0	0	0	0	0	0	0	0	0	0	0	0	0	0	0	0	0	0
1366	136620001	1053	Roche	38.6053	33.2446	34.7169	Modified			0	0	0	0	0	0	0	0	0	0	0	0	0	0	0	0	0	0	0	0	0
1366	136620001	1054	Roche	18.9295	13.0983	15.5719	Modified			0	0	0	0	0	0	0	0	0	0	0	0	0	0	0	0	0	0	0	0	0
1366	136620001	1055	Roche	39.1137	18.3652	25.5806	Pristine	Remobilized		0	0	0	0	0	0	0	0	0	0	0	0	0	0	0	0	0	0	0	0	0
1366	136620001	1056	Roche	37.6761	32.5695	31.8442	Pristine	Remobilized		0	0	0	0	0	0	0	0	0	0	0	0	0	0	0	0	0	0	0	0	0
1366	136620001	1057	Roche	21.9505	20.7675	21.0948	Reshaped			0	0	0	0	0	0	0	0	0	0	0	0	0	0	0	0	0	0	0	0	0
1366	136620001	1058	Roche	52.6377	32.6185	40.015	Modified			0	0	0	0	0	0	0	0	0	0	0	0	0	0	0	0	0	0	0	0	0
1366	136620001	1059	Roche	32.8861	30.7162	30.2226	Modified			0	0	0	0	0	0	0	0	0	0	0	0	0	0	0	0	0	0	0	0	0
1366	136620001	106	Roche	40.9831	21.3036	28.5284	Modified			0	0	0	0	0	0	0	0	0	0	0	0	0	0	0	0	0	0	0	0	0
1366	136620001	1060	Roche	36.1473	28.6566	29.4335	Pristine	Remobilized		0	0	0	0	0	0	0	0	0	0	0	0	0	0	0	0	0	0	0	0	0
1366	136620001	1061	Roche	37.6639	30.6932	33.7112	Modified			0	0	0	0	0	0	0	0	0	0	0	0	0	0	0	0	0	0	0	0	0
1366	136620001	1062	Roche	46.0978	36.1673	38.3578	Modified			0	0	0	0	0	0	0	0	0	0	0	0	0	0	0	0	0	0	0	0	0
1366	136620001	1063	Roche	24.5423	19.7075	21.3237	Pristine	Mutual		0	0	0	0	0	0	0	0	0	0	0	0	0	0	0	0	0	0	0	0	0
1366	136620001	1064	Roche	21.7669	21.6846	19.6663	Pristine	Remobilized		0	0	0	0	0	0	0	0	0	0	0	0	0	0	0	0	0	0	0	0	0
1366	136620001	1065	Roche	36.3978	18.9752	23.6511	Pristine	Remobilized		0	0	0	0	0	0	0	0	0	0	0	0	0	0	0	0	0	0	0	0	0
1366	136620001	1066	Roche	27.9173	15.7611	19.4441	Pristine	Intergranular		0	0	0	0	0	0	0	0	0	0	0	0	0	0	0	0	0	0	0	0	0
1366	136620001	1067	Roche	45.6569	34.9998	36.7825	Modified			0	0	0	0	0	0	0	0	0	0	0	0	0	0	0	0	0	0	0	0	0
1366	136620001	1068	Roche	38.7344	19.7186	27.3176	Modified			0	0	0	0	0	0	0	0	0	0	0	0	0	0	0	0	0	0	0	0	0
1366	136620001	1069	Roche	20.5159	15.7591	18.4232	Pristine	Remobilized		0	0	0	0	0	0	0	0	0	0	0	0	0	0	0	0	0	0	0	0	0
1366	136620001	107	Roche	34	27.0899	30.3338	Modified			0	0	0	0	0	0	0	0	0	0	0	0	0	0	0	0	0	0	0	0	0
1366	136620001	1070	Roche	57.2881	21.8335	32.8831	Pristine	Remobilized		0	0	0	0	0	0	0	0	0	0	0	0	0	0	0	0	0	0	0	0	0
1366	136620001	1071	Roche	31.8179	24.3401	25.2948	Pristine	Intergranular		0	0	0	0	0	0	0	0	0	0	0	0	0	0	0	0	0	0	0	0	0
1366	136620001	1072	Roche	32.1073	19.7914	24.0173	Modified			0	0	0	0	0	0	0	0	0	0	0	0	0	0	0	0	0	0	0	0	0
1366	136620001	1073	Roche	21.046	17.3243	19.0311	Pristine	Crystalline		0	0	0	0	0	0	0	0	0	0	0	0	0	0	0	0	0	0	0	0	0
1366	136620001	1074	Roche	43.4387	25.1152	31.5751	Modified			0	0	0	0	0	0	0	0	0	0	0	0	0	0	0	0	0	0	0	0	0
1366	136620001	1075	Roche	51.2392	23.11	32.7094	Modified			0	0	0	0	0	0	0	0	0	0	0	0	0	0	0	0	0	0	0	0	0
1366	136620001	1076	Roche	22.5535	15.4684	16.4184	Pristine	Remobilized		0	0	0	0	0	0	0	0	0	0	0	0	0	0	0	0	0	0	0	0	0
1366	136620001	1077	Roche	29.218	28.2536	27.6028	Modified			0	0	0	0	0	0	0	0	0	0	0	0	0	0	0	0	0	0	0	0	0
1366	136620001	1078	Roche	44.306	40.8569	43.0332	Pristine	Crystalline		0	0	0	0	0	0	0	0	0	0	0	0	0	0	0	0	0	0	0	0	0
1366	136620001	1079	Roche	72.866	22.1578	36.1006	Modified			0	0	0	0	0	0	0	0	0	0	0	0	0	0	0	0	0	0	0	0	0
1366	136620001	108	Roche	20.276	18.7186	19.2865	Modified			0	0	0	0	0	0	0	0	0	0	0	0	0	0	0	0	0	0	0	0	0
1366	136620001	1080	Roche	54.2407	41.8397	45.7883	Pristine	Remobilized		0	0	0	0	0	0	0	0	0	0	0	0	0	0	0	0	0	0	0	0	0
1366	136620001	1081	Roche	31.5141	30.8103	28.758	Modified			0	0	0	0	0	0	0	0	0	0	0	0	0	0	0	0	0	0	0	0	0
1366	136620001	1082	Roche	44.8683	35.4195	38.0231	Modified			0	0	0	0	0	0	0	0	0	0	0	0	0	0	0	0	0	0	0	0	0
1366	136620001	1083	Roche	46.3912	32.6193	37.3654	Modified			0	0	0	0	0	0	0	0	0	0	0	0	0	0	0	0	0	0	0	0	0
1366	136620001	1084	Roche	28.6237	27.4794	26.885	Modified			0	0	0	0	0	0	0	0	0	0	0	0	0	0	0	0	0	0	0	0	0
1366	136620001	1085	Roche	25.1602	22.9391	22.4057	Modified			0	0	0	0	0	0	0	0	0	0	0	0	0	0	0	0	0	0	0	0	0
1366	136620001	1086	Roche	54.1533	27.7338	37.3278	Modified			0	0	0	0	0	0	0	0	0	0	0	0	0	0	0	0	0	0	0	0	0
1366	136620001	1087	Roche	20.9617	13.3791	16.5747	Pristine	Mutual		0	0	0	0	0	0	0	0	0	0	0	0	0	0	0	0	0	0	0	0	0
1366	136620001	1088	Roche	34.1167	28.0441	27.888	Modified			0	0	0	0	0	0	0	0	0	0	0	0	0	0	0	0	0	0	0	0	0
1366	136620001	1089	Roche	15.0608	14.0455	14.7612	Pristine	Crystalline		0	0	0	0	0	0	0	0	0	0	0	0	0	0	0	0	0	0	0	0	0
1366	136620001	109	Roche	44.0942	27.2012	34.1379	Modified			0	0	0	0	0	0	0	0	0	0	0	0	0	0	0	0	0	0	0	0	0
1366	136620001	1090	Roche	61.9704	39.7955	46.8772	Modified			0	0	0	0	0	0	0	0	0	0	0	0	0	0	0	0	0	0	0	0	0
1366	136620001	1091	Roche	29.1738	18.688	22.1785	Modified			0	0	0	0	0	0	0	0	0	0	0	0	0	0	0	0	0	0	0	0	0
1366	136620001	1092	Roche	16.8243	14.4584	15.5642	Pristine	Mutual		0	0	0	0	0	0	0	0	0	0	0	0	0	0	0	0	0	0	0	0	0
1366	136620001	1093	Roche	55.6933	41.8047	48.7009	Reshaped			0	0	0	0	0	0	0	0	0	0	0	0	0	0	0	0	0	0	0	0	0
1366	136620001	1094	Roche	24.6052	18.026	18.8201	Modified			0	0	0	0	0	0	0	0	0	0	0	0	0	0	0	0	0	0	0	0	0
1366	136620001	1095	Roche	27.1896	15.0614	17.6388	Modified			0	0	0	0	0	0	0	0	0	0	0	0	0	0	0	0	0	0	0	0	0
1366	136620001	1096	Roche	27.2775	16.5217	21.1908	Pristine	Crystalline		0	0	0	0	0	0	0	0	0	0	0	0	0	0	0	0	0	0	0	0	0
1366	136620001	1097	Roche	20.7886	13.331	16.6419	Pristine	Remobilized		0	0	0	0	0	0	0	0	0	0	0	0	0	0	0	0	0	0	0	0	0
1366	136620001	1098	Roche	35.6269	15.5792	20.7019	Modified			0	0	0	0	0	0	0	0	0	0	0	0	0	0	0	0	0	0	0	0	0
1366	136620001	1099	Roche	46.3734	27.3973	32.1736	Modified			0	0	0	0	0	0	0	0	0	0	0	0	0	0	0	0	0	0	0	0	0
1366	136620001	11	Roche	19.3933	16.0118	16.6954	Modified		2020-06-04		4.30927	95.6907	0	0	0	0	0	0	0	0	0	0	0	0	0	0	0	0	0	100
1366	136620001	110	Roche	22.2843	21.7229	21.3263	Pristine	Remobilized		0	0	0	0	0	0	0	0	0	0	0	0	0	0	0	0	0	0	0	0	0
1366	136620001	1100	Roche	22.2576	21.8383	22.0759	Reshaped			0	0	0	0	0	0	0	0	0	0	0	0	0	0	0	0	0	0	0	0	0
1366	136620001	1101	Roche	37.0913	19.0453	24.673	Pristine	Remobilized		0	0	0	0	0	0	0	0	0	0	0	0	0	0	0	0	0	0	0	0	0
1366	136620001	1102	Roche	22.3604	17.7489	19.4637	Modified			0	0	0	0	0	0	0	0	0	0	0	0	0	0	0	0	0	0	0	0	0
1366	136620001	1103	Roche	42.1889	26.9288	33.2278	Pristine	Mutual		0	0	0	0	0	0	0	0	0	0	0	0	0	0	0	0	0	0	0	0	0
1366	136620001	1104	Roche	61.1314	30.1893	41.2401	Modified			0	0	0	0	0	0	0	0	0	0	0	0	0	0	0	0	0	0	0	0	0
1366	136620001	1105	Roche	24.9085	22.2132	23.1401	Modified			0	0	0	0	0	0	0	0	0	0	0	0	0	0	0	0	0	0	0	0	0
1366	136620001	1106	Roche	28.8699	25.8786	27.7696	Modified			0	0	0	0	0	0	0	0	0	0	0	0	0	0	0	0	0	0	0	0	0
1366	136620001	1107	Roche	19.3713	10.9943	14.7902	Pristine	Mutual		0	0	0	0	0	0	0	0	0	0	0	0	0	0	0	0	0	0	0	0	0
1366	136620001	1108	Roche	32.797	30.3807	31.9139	Reshaped			0	0	0	0	0	0	0	0	0	0	0	0	0	0	0	0	0	0	0	0	0
1366	136620001	1109	Roche	59.7702	27.1227	36.7487	Pristine	Remobilized		0	0	0	0	0	0	0	0	0	0	0	0	0	0	0	0	0	0	0	0	0
1366	136620001	111	Roche	36.3025	34.5081	35.0993	Modified			0	0	0	0	0	0	0	0	0	0	0	0	0	0	0	0	0	0	0	0	0
1366	136620001	1110	Roche	39.0628	27.665	29.4242	Pristine	Crystalline		0	0	0	0	0	0	0	0	0	0	0	0	0	0	0	0	0	0	0	0	0
1366	136620001	1111	Roche	24.0529	15.9669	19.0123	Modified			0	0	0	0	0	0	0	0	0	0	0	0	0	0	0	0	0	0	0	0	0
1366	136620001	1112	Roche	27.6268	21.5726	23.4428	Modified			0	0	0	0	0	0	0	0	0	0	0	0	0	0	0	0	0	0	0	0	0
1366	136620001	1113	Roche	26.0938	18.9003	21.9054	Modified			0	0	0	0	0	0	0	0	0	0	0	0	0	0	0	0	0	0	0	0	0
1366	136620001	1114	Roche	46.4663	32.4087	36.1747	Pristine	Remobilized		0	0	0	0	0	0	0	0	0	0	0	0	0	0	0	0	0	0	0	0	0
1366	136620001	1115	Roche	16.8842	15.2417	15.1379	Modified			0	0	0	0	0	0	0	0	0	0	0	0	0	0	0	0	0	0	0	0	0
1366	136620001	1116	Roche	25.6864	22.2397	23.2039	Modified			0	0	0	0	0	0	0	0	0	0	0	0	0	0	0	0	0	0	0	0	0
1366	136620001	1117	Roche	29.9721	20.4755	23.5864	Modified			0	0	0	0	0	0	0	0	0	0	0	0	0	0	0	0	0	0	0	0	0
1366	136620001	1118	Roche	33.1153	23.0622	26.1893	Modified			0	0	0	0	0	0	0	0	0	0	0	0	0	0	0	0	0	0	0	0	0
1366	136620001	1119	Roche	48.5167	31.6891	38.3589	Modified			0	0	0	0	0	0	0	0	0	0	0	0	0	0	0	0	0	0	0	0	0
1366	136620001	112	Roche	43.6377	22.8292	29.3072	Pristine	Mutual		0	0	0	0	0	0	0	0	0	0	0	0	0	0	0	0	0	0	0	0	0
1366	136620001	1120	Roche	35.3344	35.2675	34.1834	Modified			0	0	0	0	0	0	0	0	0	0	0	0	0	0	0	0	0	0	0	0	0
1366	136620001	1121	Roche	30.5038	29.0464	29.4031	Reshaped			0	0	0	0	0	0	0	0	0	0	0	0	0	0	0	0	0	0	0	0	0
1366	136620001	1122	Roche	42.5579	36.8887	39.2167	Modified			0	0	0	0	0	0	0	0	0	0	0	0	0	0	0	0	0	0	0	0	0
1366	136620001	1123	Roche	50.3168	32.2292	38.9519	Modified			0	0	0	0	0	0	0	0	0	0	0	0	0	0	0	0	0	0	0	0	0
1366	136620001	1124	Roche	41.2147	20.3203	27.2628	Modified			0	0	0	0	0	0	0	0	0	0	0	0	0	0	0	0	0	0	0	0	0
1366	136620001	1125	Roche	5.15614	2.58425	3.34612	Pristine	Crystalline		0	0	0	0	0	0	0	0	0	0	0	0	0	0	0	0	0	0	0	0	0
1366	136620001	1126	Roche	48.0035	24.8952	32.0844	Pristine	Remobilized		0	0	0	0	0	0	0	0	0	0	0	0	0	0	0	0	0	0	0	0	0
1366	136620001	1127	Roche	28.3356	18.1234	21.7951	Modified			0	0	0	0	0	0	0	0	0	0	0	0	0	0	0	0	0	0	0	0	0
1366	136620001	1128	Roche	23.8591	13.3884	17.519	Modified			0	0	0	0	0	0	0	0	0	0	0	0	0	0	0	0	0	0	0	0	0
1366	136620001	1129	Roche	42.9327	42.1529	39.4226	Modified			0	0	0	0	0	0	0	0	0	0	0	0	0	0	0	0	0	0	0	0	0
1366	136620001	113	Roche	37.0436	32.7745	35.3996	Modified			0	0	0	0	0	0	0	0	0	0	0	0	0	0	0	0	0	0	0	0	0
1366	136620001	1130	Roche	27.2317	11.2597	17.0784	Modified			0	0	0	0	0	0	0	0	0	0	0	0	0	0	0	0	0	0	0	0	0
1366	136620001	1131	Roche	31.5562	22.6433	25.1429	Modified			0	0	0	0	0	0	0	0	0	0	0	0	0	0	0	0	0	0	0	0	0
1366	136620001	1132	Roche	22.1641	13.2177	17.1182	Pristine	Mutual		0	0	0	0	0	0	0	0	0	0	0	0	0	0	0	0	0	0	0	0	0
1366	136620001	1133	Roche	30.4189	17.2843	20.8952	Pristine	Remobilized		0	0	0	0	0	0	0	0	0	0	0	0	0	0	0	0	0	0	0	0	0
1366	136620001	1134	Roche	64.018	32.3097	43.9067	Modified			0	0	0	0	0	0	0	0	0	0	0	0	0	0	0	0	0	0	0	0	0
1366	136620001	1135	Roche	27.5141	26.4117	25.264	Modified			0	0	0	0	0	0	0	0	0	0	0	0	0	0	0	0	0	0	0	0	0
1366	136620001	1136	Roche	46.0036	21.6445	28.6254	Pristine	Remobilized		0	0	0	0	0	0	0	0	0	0	0	0	0	0	0	0	0	0	0	0	0
1366	136620001	1137	Roche	28.244	27.2424	26.8754	Modified			0	0	0	0	0	0	0	0	0	0	0	0	0	0	0	0	0	0	0	0	0
1366	136620001	1138	Roche	61.7523	40.9313	45.8078	Modified			0	0	0	0	0	0	0	0	0	0	0	0	0	0	0	0	0	0	0	0	0
1366	136620001	1139	Roche	26.9639	20.1802	23.1018	Modified			0	0	0	0	0	0	0	0	0	0	0	0	0	0	0	0	0	0	0	0	0
1366	136620001	114	Roche	26.6158	23.1379	24.0708	Modified			0	0	0	0	0	0	0	0	0	0	0	0	0	0	0	0	0	0	0	0	0
1366	136620001	1140	Roche	25.6608	15.3529	19.3568	Pristine	Mutual		0	0	0	0	0	0	0	0	0	0	0	0	0	0	0	0	0	0	0	0	0
1366	136620001	1141	Roche	41.5543	40.3909	39.523	Modified			0	0	0	0	0	0	0	0	0	0	0	0	0	0	0	0	0	0	0	0	0
1366	136620001	1142	Roche	27.003	20.323	23.0293	Modified			0	0	0	0	0	0	0	0	0	0	0	0	0	0	0	0	0	0	0	0	0
1366	136620001	1143	Roche	21.7962	19.3422	18.9114	Pristine	Remobilized		0	0	0	0	0	0	0	0	0	0	0	0	0	0	0	0	0	0	0	0	0
1366	136620001	1144	Roche	59.4178	34.2706	42.4076	Modified			0	0	0	0	0	0	0	0	0	0	0	0	0	0	0	0	0	0	0	0	0
1366	136620001	1145	Roche	38.9978	27.8862	32.6806	Pristine	Remobilized		0	0	0	0	0	0	0	0	0	0	0	0	0	0	0	0	0	0	0	0	0
1366	136620001	1146	Roche	46.5588	29.9211	34.8638	Modified			0	0	0	0	0	0	0	0	0	0	0	0	0	0	0	0	0	0	0	0	0
1366	136620001	1147	Roche	25.9574	19.4522	21.649	Modified			0	0	0	0	0	0	0	0	0	0	0	0	0	0	0	0	0	0	0	0	0
1366	136620001	1148	Roche	44.3446	38.4711	40.117	Modified			0	0	0	0	0	0	0	0	0	0	0	0	0	0	0	0	0	0	0	0	0
1366	136620001	1149	Roche	53.6134	40.4606	46.4025	Modified			0	0	0	0	0	0	0	0	0	0	0	0	0	0	0	0	0	0	0	0	0
1366	136620001	115	Roche	40.4843	33.9443	37.0034	Reshaped			0	0	0	0	0	0	0	0	0	0	0	0	0	0	0	0	0	0	0	0	0
1366	136620001	1150	Roche	28.9672	24.5246	26.3603	Reshaped			0	0	0	0	0	0	0	0	0	0	0	0	0	0	0	0	0	0	0	0	0
1366	136620001	1151	Roche	22.2908	20.5067	20.5183	Pristine	Remobilized		0	0	0	0	0	0	0	0	0	0	0	0	0	0	0	0	0	0	0	0	0
1366	136620001	1152	Roche	49.196	35.8826	40.6727	Modified			0	0	0	0	0	0	0	0	0	0	0	0	0	0	0	0	0	0	0	0	0
1366	136620001	1153	Roche	62.8701	22.5842	34.9131	Modified			0	0	0	0	0	0	0	0	0	0	0	0	0	0	0	0	0	0	0	0	0
1366	136620001	1154	Roche	55.4768	34.4671	41.7336	Modified			0	0	0	0	0	0	0	0	0	0	0	0	0	0	0	0	0	0	0	0	0
1366	136620001	1155	Roche	66.4207	51.5165	50.2101	Modified			0	0	0	0	0	0	0	0	0	0	0	0	0	0	0	0	0	0	0	0	0
1366	136620001	1156	Roche	31.5883	28.4041	26.1283	Pristine	Remobilized		0	0	0	0	0	0	0	0	0	0	0	0	0	0	0	0	0	0	0	0	0
1366	136620001	1157	Roche	34.7107	19.5713	24.9651	Modified			0	0	0	0	0	0	0	0	0	0	0	0	0	0	0	0	0	0	0	0	0
1366	136620001	1158	Roche	55.8817	35.6719	41.9313	Modified			0	0	0	0	0	0	0	0	0	0	0	0	0	0	0	0	0	0	0	0	0
1366	136620001	1159	Roche	31.9746	28.9587	30.8315	Reshaped			0	0	0	0	0	0	0	0	0	0	0	0	0	0	0	0	0	0	0	0	0
1366	136620001	116	Roche	33.7016	24.2072	28.4576	Modified			0	0	0	0	0	0	0	0	0	0	0	0	0	0	0	0	0	0	0	0	0
1366	136620001	1160	Roche	62.2323	36.7811	38.7883	Pristine	Remobilized		0	0	0	0	0	0	0	0	0	0	0	0	0	0	0	0	0	0	0	0	0
1366	136620001	1161	Roche	17.4815	14.4584	16.0303	Reshaped			0	0	0	0	0	0	0	0	0	0	0	0	0	0	0	0	0	0	0	0	0
1366	136620001	1162	Roche	17.8665	13.107	15.0511	Pristine	Mutual		0	0	0	0	0	0	0	0	0	0	0	0	0	0	0	0	0	0	0	0	0
1366	136620001	1163	Roche	33.9554	25.2267	28.5105	Pristine	Crystalline		0	0	0	0	0	0	0	0	0	0	0	0	0	0	0	0	0	0	0	0	0
1366	136620001	1164	Roche	47.8644	25.5398	32.6584	Pristine	Remobilized		0	0	0	0	0	0	0	0	0	0	0	0	0	0	0	0	0	0	0	0	0
1366	136620001	1165	Roche	59.9835	37.1067	43.9149	Modified			0	0	0	0	0	0	0	0	0	0	0	0	0	0	0	0	0	0	0	0	0
1366	136620001	1166	Roche	27.5296	21.7842	23.5287	Modified			0	0	0	0	0	0	0	0	0	0	0	0	0	0	0	0	0	0	0	0	0
1366	136620001	1167	Roche	53.9675	30.6967	37.0839	Pristine	Remobilized		0	0	0	0	0	0	0	0	0	0	0	0	0	0	0	0	0	0	0	0	0
1366	136620001	1168	Roche	25.5282	14.0462	17.9607	Modified			0	0	0	0	0	0	0	0	0	0	0	0	0	0	0	0	0	0	0	0	0
1366	136620001	1169	Roche	19.0907	15.797	16.856	Modified			0	0	0	0	0	0	0	0	0	0	0	0	0	0	0	0	0	0	0	0	0
1366	136620001	117	Roche	36.2598	14.3224	23.2061	Pristine	Mutual		0	0	0	0	0	0	0	0	0	0	0	0	0	0	0	0	0	0	0	0	0
1366	136620001	1170	Roche	91.0028	63.7103	71.4212	Pristine	Crystalline	2020-06-29	0	0	0	0	0	0	0	0	0	0	0	0	0	0	0	0	0	0	0	0	0
1366	136620001	1171	Roche	64.9225	43.374	53.4462	Modified		2020-06-29	0	0	0	0	0	0	0	0	0	0	0	0	0	0	0	0	0	0	0	0	0
1366	136620001	1172	Roche	66.6815	58.2941	62.1661	Modified		2020-06-29	0	0	0	0	0	0	0	0	0	0	0	0	0	0	0	0	0	0	0	0	0
1366	136620001	1173	Roche	100.891	53.4836	71.0327	Modified		2020-06-29	0	0	0	0	0	0	0	0	0	0	0	0	0	0	0	0	0	0	0	0	0
1366	136620001	1174	Roche	54.9022	40.7005	47.0915	Modified		2020-06-29	0	0	0	0	0	0	0	0	0	0	0	0	0	0	0	0	0	0	0	0	0
1366	136620001	1175	Roche	90.6272	57.5233	66.0589	Pristine	Remobilized	2020-06-29	0	0	0	0	0	0	0	0	0	0	0	0	0	0	0	0	0	0	0	0	0
1366	136620001	1176	Roche	141.003	53.2048	83.0315	Pristine	Remobilized	2020-06-29	0	0	0	0	0	0	0	0	0	0	0	0	0	0	0	0	0	0	0	0	0
1366	136620001	1177	Roche	77.6981	64.5872	66.5165	Pristine	Remobilized	2020-06-29	0	0	0	0	0	0	0	0	0	0	0	0	0	0	0	0	0	0	0	0	0
1366	136620001	1178	Roche	100.368	89.9132	92.2278	Modified		2020-06-29	0	0	0	0	0	0	0	0	0	0	0	0	0	0	0	0	0	0	0	0	0
1366	136620001	1179	Roche	87.1371	65.1098	68.4595	Modified		2020-06-29	0	0	0	0	0	0	0	0	0	0	0	0	0	0	0	0	0	0	0	0	0
1366	136620001	118	Roche	26.1695	19.7169	21.0997	Pristine	Remobilized		0	0	0	0	0	0	0	0	0	0	0	0	0	0	0	0	0	0	0	0	0
1366	136620001	1180	Roche	97.4036	54.5988	67.978	Modified		2020-06-29	0	0	0	0	0	0	0	0	0	0	0	0	0	0	0	0	0	0	0	0	0
1366	136620001	1181	Roche	80.426	55.6986	61.9659	Pristine	Remobilized	2020-06-29	0	0	0	0	0	0	0	0	0	0	0	0	0	0	0	0	0	0	0	0	0
1366	136620001	1182	Roche	161.344	123.097	137.344	Modified		2020-06-29	0	0	0	0	0	0	0	0	0	0	0	0	0	0	0	0	0	0	0	0	0
1366	136620001	1183	Roche	56.0331	55.2712	53.1635	Modified		2020-06-29	0	0	0	0	0	0	0	0	0	0	0	0	0	0	0	0	0	0	0	0	0
1366	136620001	1184	Roche	60.8329	55.8249	55.233	Modified		2020-06-29	0	0	0	0	0	0	0	0	0	0	0	0	0	0	0	0	0	0	0	0	0
1366	136620001	1185	Roche	50.2351	43.3267	44.5915	Modified		2020-06-29	0	0	0	0	0	0	0	0	0	0	0	0	0	0	0	0	0	0	0	0	0
1366	136620001	1186	Roche	64.5033	46.9625	50.8949	Pristine	Remobilized	2020-06-29	0	0	0	0	0	0	0	0	0	0	0	0	0	0	0	0	0	0	0	0	0
1366	136620001	1187	Roche	73.7736	46.0764	58.9906	Modified		2020-06-29	0	0	0	0	0	0	0	0	0	0	0	0	0	0	0	0	0	0	0	0	0
1366	136620001	1188	Roche	82.3018	54.3107	65.0638	Modified		2020-06-29	0	0	0	0	0	0	0	0	0	0	0	0	0	0	0	0	0	0	0	0	0
1366	136620001	1189	Roche	56.4279	46.7334	51.9557	Modified		2020-06-29	0	0	0	0	0	0	0	0	0	0	0	0	0	0	0	0	0	0	0	0	0
1366	136620001	119	Roche	51.216	40.1789	45.094	Modified			0	0	0	0	0	0	0	0	0	0	0	0	0	0	0	0	0	0	0	0	0
1366	136620001	1190	Roche	41.4737	40.4352	40.5742	Modified		2020-06-29	0	0	0	0	0	0	0	0	0	0	0	0	0	0	0	0	0	0	0	0	0
1366	136620001	1191	Roche	69.1567	64.016	64.5117	Modified		2020-06-29	0	0	0	0	0	0	0	0	0	0	0	0	0	0	0	0	0	0	0	0	0
1366	136620001	1192	Roche	113.304	49.6975	65.6893	Modified		2020-06-29	0	0	0	0	0	0	0	0	0	0	0	0	0	0	0	0	0	0	0	0	0
1366	136620001	1193	Roche	65.7828	48.8817	55.4048	Modified		2020-06-29	0	0	0	0	0	0	0	0	0	0	0	0	0	0	0	0	0	0	0	0	0
1366	136620001	1194	Roche	79.5588	65.7851	69.4715	Modified		2020-06-29	0	0	0	0	0	0	0	0	0	0	0	0	0	0	0	0	0	0	0	0	0
1366	136620001	1195	Roche	116.859	67.7168	87.2082	Modified		2020-06-29	0	0	0	0	0	0	0	0	0	0	0	0	0	0	0	0	0	0	0	0	0
1366	136620001	1196	Roche	60.0075	52.9309	55.6473	Modified		2020-06-29	0	0	0	0	0	0	0	0	0	0	0	0	0	0	0	0	0	0	0	0	0
1366	136620001	1197	Roche	83.0238	79.397	71.781	Pristine	Intergranular	2020-06-29	0	0	0	0	0	0	0	0	0	0	0	0	0	0	0	0	0	0	0	0	0
1366	136620001	1198	Roche	109.224	68.5158	79.1467	Modified		2020-06-29	0	0	0	0	0	0	0	0	0	0	0	0	0	0	0	0	0	0	0	0	0
1366	136620001	1199	Roche	87.2792	60.1925	66.1966	Pristine	Remobilized	2020-06-29	0	0	0	0	0	0	0	0	0	0	0	0	0	0	0	0	0	0	0	0	0
1366	136620001	12	Roche	37.208	17.0638	23.6588	Modified		2020-06-04		2.79929	96.4602	0	0	0.740504	0	0	0	0	0	0	0	0	0	0	0	0	0	0	100
1366	136620001	120	Roche	44.1408	35.9494	40.6589	Modified			0	0	0	0	0	0	0	0	0	0	0	0	0	0	0	0	0	0	0	0	0
1366	136620001	1200	Roche	90.8214	60.2785	73.3569	Modified		2020-06-29	0	0	0	0	0	0	0	0	0	0	0	0	0	0	0	0	0	0	0	0	0
1366	136620001	1201	Roche	80.3088	49.9167	58.8872	Modified		2020-06-29	0	0	0	0	0	0	0	0	0	0	0	0	0	0	0	0	0	0	0	0	0
1366	136620001	1202	Roche	144.423	122.788	130.076	Reshaped		2020-06-29	0	0	0	0	0	0	0	0	0	0	0	0	0	0	0	0	0	0	0	0	0
1366	136620001	1203	Roche	61.0946	49.064	50.3425	Modified		2020-06-29	0	0	0	0	0	0	0	0	0	0	0	0	0	0	0	0	0	0	0	0	0
1366	136620001	1204	Roche	76.561	47.834	54.128	Modified		2020-06-29	0	0	0	0	0	0	0	0	0	0	0	0	0	0	0	0	0	0	0	0	0
1366	136620001	1205	Roche	64.0465	51.0197	55.1318	Modified		2020-06-29	0	0	0	0	0	0	0	0	0	0	0	0	0	0	0	0	0	0	0	0	0
1366	136620001	1206	Roche	54.3733	52.268	51.7572	Modified		2020-06-29	0	0	0	0	0	0	0	0	0	0	0	0	0	0	0	0	0	0	0	0	0
1366	136620001	1207	Roche	73.4596	56.76	62.0223	Pristine	Remobilized	2020-06-29	0	0	0	0	0	0	0	0	0	0	0	0	0	0	0	0	0	0	0	0	0
1366	136620001	1208	Roche	117.98	65.5675	76.5528	Modified		2020-06-29	0	0	0	0	0	0	0	0	0	0	0	0	0	0	0	0	0	0	0	0	0
1366	136620001	1209	Roche	37.7835	24.6178	29.8815	Reshaped		2020-06-29	0	0	0	0	0	0	0	0	0	0	0	0	0	0	0	0	0	0	0	0	0
1366	136620001	121	Roche	33.5992	26.342	28.3984	Modified			0	0	0	0	0	0	0	0	0	0	0	0	0	0	0	0	0	0	0	0	0
1366	136620001	1210	Roche	76.4252	60.0616	63.8671	Pristine	Intergranular	2020-06-29	0	0	0	0	0	0	0	0	0	0	0	0	0	0	0	0	0	0	0	0	0
1366	136620001	1211	Roche	102.396	59.5065	67.1206	Modified		2020-06-29	0	0	0	0	0	0	0	0	0	0	0	0	0	0	0	0	0	0	0	0	0
1366	136620001	1212	Roche	71.5662	67.8178	66.1371	Pristine	Remobilized	2020-06-29	0	0	0	0	0	0	0	0	0	0	0	0	0	0	0	0	0	0	0	0	0
1366	136620001	1213	Roche	80.8894	64.4944	70.562	Modified		2020-06-29	0	0	0	0	0	0	0	0	0	0	0	0	0	0	0	0	0	0	0	0	0
1366	136620001	1214	Roche	98.572	56.4702	65.6685	Pristine	Intergranular	2020-06-29	0	0	0	0	0	0	0	0	0	0	0	0	0	0	0	0	0	0	0	0	0
1366	136620001	1215	Roche	100.971	91.6421	96.45	Modified		2020-06-29	0	0	0	0	0	0	0	0	0	0	0	0	0	0	0	0	0	0	0	0	0
1366	136620001	1216	Roche	122.322	105.157	102.187	Modified		2020-06-29	0	0	0	0	0	0	0	0	0	0	0	0	0	0	0	0	0	0	0	0	0
1366	136620001	1217	Roche	71.3364	52.2641	55.9905	Modified		2020-06-29	0	0	0	0	0	0	0	0	0	0	0	0	0	0	0	0	0	0	0	0	0
1366	136620001	1218	Roche	141.888	51.7962	80.4642	Modified		2020-06-29	0	0	0	0	0	0	0	0	0	0	0	0	0	0	0	0	0	0	0	0	0
1366	136620001	1219	Roche	162.126	157.732	150.689	Pristine	Remobilized	2020-06-29	0	0	0	0	0	0	0	0	0	0	0	0	0	0	0	0	0	0	0	0	0
1366	136620001	122	Roche	41.6379	22.4358	30.137	Modified			0	0	0	0	0	0	0	0	0	0	0	0	0	0	0	0	0	0	0	0	0
1366	136620001	1220	Roche	50.1878	43.6077	47.2529	Modified		2020-06-29	0	0	0	0	0	0	0	0	0	0	0	0	0	0	0	0	0	0	0	0	0
1366	136620001	1221	Roche	67.4685	47.977	57.4112	Modified		2020-06-29	0	0	0	0	0	0	0	0	0	0	0	0	0	0	0	0	0	0	0	0	0
1366	136620001	1222	Roche	91.0022	46.3088	61.1652	Pristine	Remobilized	2020-06-29	0	0	0	0	0	0	0	0	0	0	0	0	0	0	0	0	0	0	0	0	0
1366	136620001	1223	Roche	106.076	76.3902	84.3807	Modified		2020-06-29	0	0	0	0	0	0	0	0	0	0	0	0	0	0	0	0	0	0	0	0	0
1366	136620001	1224	Roche	58.3108	51.1737	52.9134	Modified		2020-06-29	0	0	0	0	0	0	0	0	0	0	0	0	0	0	0	0	0	0	0	0	0
1366	136620001	1225	Roche	66.9005	54.9099	60.4522	Modified		2020-06-29	0	0	0	0	0	0	0	0	0	0	0	0	0	0	0	0	0	0	0	0	0
1366	136620001	1226	Roche	39.0428	27.1318	29.9998	Pristine	Remobilized	2020-06-29	0	0	0	0	0	0	0	0	0	0	0	0	0	0	0	0	0	0	0	0	0
1366	136620001	1227	Roche	108.846	89.8936	92.2769	Modified		2020-06-29	0	0	0	0	0	0	0	0	0	0	0	0	0	0	0	0	0	0	0	0	0
1366	136620001	1228	Roche	56.7802	46.0965	51.0731	Modified		2020-06-29	0	0	0	0	0	0	0	0	0	0	0	0	0	0	0	0	0	0	0	0	0
1366	136620001	1229	Roche	49.7016	47.425	47.8023	Pristine	Crystalline	2020-06-29	0	0	0	0	0	0	0	0	0	0	0	0	0	0	0	0	0	0	0	0	0
1366	136620001	123	Roche	27.3463	15.6593	20.2922	Modified			0	0	0	0	0	0	0	0	0	0	0	0	0	0	0	0	0	0	0	0	0
1366	136620001	1230	Roche	21.3131	15.0429	17.7259	Mutual
1366	136620001	1231	Roche	27.1153	24.352	25.2003	Modified
1366	136620001	1232	Roche	14.9842	13.2754	13.6807	Mutual
1366	136620001	1233	Roche	22.531	18.4573	18.8467	Crystalin
1366	136620001	1234	Roche	28.0047	20.1539	22.3078	Remobilized
1366	136620001	1235	Roche	23.2912	10.7533	14.7399	Remobilized
1366	136620001	1236	Roche	28.4279	21.5071	22.5891	Remobilized
1366	136620001	1237	Roche	30.997	16.6844	22.3024	Modified
1366	136620001	1238	Roche	25.4867	23.0945	24.1788	Modified
1366	136620001	1239	Roche	31.0532	26.6187	25.8141	Remobilized
1366	136620001	124	Roche	23.2772	21.9936	22.8252	Modified			0	0	0	0	0	0	0	0	0	0	0	0	0	0	0	0	0	0	0	0	0
1366	136620001	1240	Roche	46.1399	34.885	39.0956	Modified
1366	136620001	1241	Roche	24.2774	15.5464	18.6481	Modified
1366	136620001	1242	Roche	35.3356	22.1688	27.7058	Modified
1366	136620001	1243	Roche	16.043	13.7099	14.5374	Remobilized
1366	136620001	1244	Roche	18.7448	14.6324	15.7601	Modified
1366	136620001	1245	Roche	55.6446	38.2313	40.6195	Modified
1366	136620001	1246	Roche	48.9478	38.0397	43.1381	Modified
1366	136620001	1247	Roche	62.5851	32.2271	39.1254	Remobilized
1366	136620001	1248	Roche	13.1886	11.6425	12.3627	Mutual
1366	136620001	1249	Roche	44.6883	28.6769	35.6162	Modified
1366	136620001	125	Roche	33.0703	22.8341	27.1222	Modified			0	0	0	0	0	0	0	0	0	0	0	0	0	0	0	0	0	0	0	0	0
1366	136620001	1250	Roche	38.9334	21.2784	27.749	Modified
1366	136620001	1251	Roche	17.7629	12.8939	14.8414	Mutual
1366	136620001	1252	Roche	58.7273	34.3416	42.4443	Reshaped
1366	136620001	1253	Roche	45.7733	37.1331	40.7833	Modified
1366	136620001	1254	Roche	30.2009	30.0225	29.6995	Modified
1366	136620001	1255	Roche	21.2532	17.5348	19.1434	Crystalin
1366	136620001	1256	Roche	15.5682	8.75528	11.2328	Intergranular
1366	136620001	1257	Roche	50.7803	50.3495	49.8085	Modified
1366	136620001	1258	Roche	23.2202	11.389	15.9364	Crystalin
1366	136620001	1259	Roche	19.8315	16.5505	15.6803	Intergranular
1366	136620001	126	Roche	20.8623	16.6258	18.4879	Pristine	Intergranular		0	0	0	0	0	0	0	0	0	0	0	0	0	0	0	0	0	0	0	0	0
1366	136620001	1260	Roche	33.9508	15.181	22.6263	Intergranular
1366	136620001	1261	Roche	23.4494	14.0058	17.3061	Modified
1366	136620001	1262	Roche	21.0273	17.3621	18.3368	Modified
1366	136620001	1263	Roche	48.6293	28.2031	36.3988	Modified
1366	136620001	1264	Roche	30.3741	26.0287	27.7109	Modified
1366	136620001	1265	Roche	46.3915	13.0984	20.0858	Remobilized
1366	136620001	1266	Roche	48.6214	43.1001	44.9429	Modified
1366	136620001	1267	Roche	56.9363	32.2011	40.0871	Modified
1366	136620001	1268	Roche	53.5354	41.0003	45.7583	Modified
1366	136620001	1269	Roche	10.5152	9.33224	10.0968	Mutual
1366	136620001	127	Roche	53.8303	25.2813	35.1576	Modified			0	0	0	0	0	0	0	0	0	0	0	0	0	0	0	0	0	0	0	0	0
1366	136620001	1270	Roche	11.041	9.59512	10.2825	Mutual
1366	136620001	1271	Roche	16.304	9.57486	12.6607	Mutual
1366	136620001	1272	Roche	14.9635	6.07514	8.76999	Intergranular
1366	136620001	1273	Roche	55.862	36.9346	45.5532	Reshaped
1366	136620001	1274	Roche	14.493	12.2812	13.0344	Modified
1366	136620001	1275	Roche	63.1454	34.7883	43.7313	Remobilized
1366	136620001	1276	Roche	36.3438	12.1876	19.9288	Intergranular
1366	136620001	1277	Roche	49.2896	48.3394	47.114	Modified
1366	136620001	1278	Roche	23.6607	15.4327	19.2326	Crystalin
1366	136620001	1279	Roche	20.9763	20.8488	21.291	Crystalin
1366	136620001	128	Roche	33.4947	20.5075	26.1448	Pristine	Mutual		0	0	0	0	0	0	0	0	0	0	0	0	0	0	0	0	0	0	0	0	0
1366	136620001	1280	Roche	37.2204	35.2289	35.7048	Modified
1366	136620001	1281	Roche	45.2754	40.8955	40.7776	Reshaped
1366	136620001	1282	Roche	55.329	32.611	39.2859	Modified
1366	136620001	1283	Roche	33.7059	12.7995	18.503	Reshaped
1366	136620001	1284	Roche	19.0298	17.3454	17.9895	Mutual
1366	136620001	1285	Roche	53.1874	43.6447	47.5448	Modified
1366	136620001	1286	Roche	24.6988	11.1899	15.2277	Intergranular
1366	136620001	1287	Roche	14.9096	7.29266	10.0559	Mutual
1366	136620001	1288	Roche	62.0255	29.4766	39.7021	Modified
1366	136620001	1289	Roche	47.6221	21.8	31.2005	Modified
1366	136620001	129	Roche	37.3944	31.7954	34.3161	Modified			0	0	0	0	0	0	0	0	0	0	0	0	0	0	0	0	0	0	0	0	0
1366	136620001	1290	Roche	61.6455	47.0837	52.0299	Modified
1366	136620001	1291	Roche	50.1006	28.4417	36.4323	Modified
1366	136620001	1292	Roche	68.2448	35.7385	47.849	Modified
1366	136620001	1293	Roche	24.7378	16.5258	19.1138	Modified
1366	136620001	1294	Roche	36.9305	26.3208	29.5251	Remobilized
1366	136620001	1295	Roche	8.08596	7.90008	7.808	Mutual
1366	136620001	1296	Roche	82.0805	33.6448	51.7499	Remobilized
1366	136620001	1297	Roche	26.7537	17.7735	21.047	Remobilized
1366	136620001	1298	Roche	51.1618	40.2088	43.3548	Modified
1366	136620001	1299	Roche	68.135	38.9744	48.1481	Modified
1366	136620001	13	Roche	55.1392	34.5717	43.434	Pristine	Crystalline	2020-06-04		0.894494	96.3407	0	0	0.603766	0	0	0	0	2.16108	0	0	0	0	0	0	0	0	0	100
1366	136620001	130	Roche	30.3613	22.4269	26.2887	Modified			0	0	0	0	0	0	0	0	0	0	0	0	0	0	0	0	0	0	0	0	0
1366	136620001	1300	Roche	18.6412	11.9636	14.2119	Crystalin
1366	136620001	1301	Roche	24.6968	13.9054	17.3055	Intergranular
1366	136620001	1302	Roche	69.5662	34.9369	45.7642	Modified
1366	136620001	1303	Roche	15.8615	9.66016	11.8716	Crystalin
1366	136620001	1304	Roche	23.1334	19.5846	21.1023	Reshaped
1366	136620001	1305	Roche	73.8823	26.4888	37.5576	Intergranular
1366	136620001	1306	Roche	67.9662	26.9885	39.8747	Intergranular
1366	136620001	1307	Roche	22.0954	9.55408	13.8211	Mutual
1366	136620001	1308	Roche	16.6856	14.5644	15.8144	Mutual
1366	136620001	1309	Roche	61.4106	37.9367	46.0276	Modified
1366	136620001	131	Roche	33.2793	31.5918	28.4498	Modified			0	0	0	0	0	0	0	0	0	0	0	0	0	0	0	0	0	0	0	0	0
1366	136620001	1310	Roche	14.7667	13.107	13.9786	Mutual
1366	136620001	1311	Roche	20.6736	9.76967	13.177	Mutual
1366	136620001	1312	Roche	14.9634	10.7238	12.9879	Crystalin
1366	136620001	1313	Roche	30.4557	21.5291	25.7732	Modified
1366	136620001	1314	Roche	13.2988	8.39578	10.6822	Mutual
1366	136620001	1315	Roche	64.0951	37.8385	42.9721	Modified
1366	136620001	1316	Roche	36.3727	35.8204	36.5339	Modified
1366	136620001	1317	Roche	16.8116	13.7549	15.0749	Mutual
1366	136620001	1318	Roche	32.8536	21.9984	25.4195	Modified
1366	136620001	1319	Roche	18.1829	15.9203	16.5402	Modified
1366	136620001	132	Roche	63.4332	40.595	49.3483	Modified			0	0	0	0	0	0	0	0	0	0	0	0	0	0	0	0	0	0	0	0	0
1366	136620001	1320	Roche	9.91794	9.86293	10.1728	Crystalin
1366	136620001	1321	Roche	24.4192	17.9973	20.7979	Modified
1366	136620001	1322	Roche	18.7937	16.882	17.823	Crystalin
1366	136620001	1323	Roche	31.5149	17.032	22.2871	Crystalin
1366	136620001	1324	Roche	26.3618	17.9047	21.528	Modified
1366	136620001	1325	Roche	32.5389	25.8529	29.183	Crystalin
1366	136620001	1326	Roche	21.2821	11.3012	16.2866	Crystalin
1366	136620001	1327	Roche	16.5884	14.1607	14.4201	Intergranular
1366	136620001	1328	Roche	19.9858	16.5765	17.5579	Intergranular
1366	136620001	1329	Roche	34.1664	21.6969	27.5491	Reshaped
1366	136620001	133	Roche	34.8803	34.7281	33.9505	Modified			0	0	0	0	0	0	0	0	0	0	0	0	0	0	0	0	0	0	0	0	0
1366	136620001	1330	Roche	21.2127	14.7453	17.7107	Mutual
1366	136620001	1331	Roche	24.2693	14.7764	17.6985	Intergranular
1366	136620001	1332	Roche	31.1264	31.0214	29.6042	Modified
1366	136620001	1333	Roche	22.6249	14.3658	18.1704	Mutual
1366	136620001	1334	Roche	18.8165	14.3701	15.723	Crystalin
1366	136620001	1335	Roche	14.4002	13.6107	13.7609	Mutual
1366	136620001	1336	Roche	17.6326	16.6818	16.999	Reshaped
1366	136620001	1337	Roche	23.6588	8.2132	14.2409	Mutual
1366	136620001	1338	Roche	21.333	14.716	16.8312	Crystalin
1366	136620001	1339	Roche	32.9904	22.9325	27.7607	Crystalin
1366	136620001	134	Roche	24.7603	23.8519	24.3222	Pristine	Remobilized		0	0	0	0	0	0	0	0	0	0	0	0	0	0	0	0	0	0	0	0	0
1366	136620001	1340	Roche	37.2789	23.8251	29.7742	Reshaped
1366	136620001	1341	Roche	48.1451	24.5501	32.1269	Modified
1366	136620001	1342	Roche	38.715	37.0413	37.7406	Modified
1366	136620001	1343	Roche	39.8476	32.2388	35.6693	Modified
1366	136620001	1344	Roche	31.6239	15.9713	20.2974	Intergranular
1366	136620001	1345	Roche	42.1922	28.1282	34.7027	Reshaped
1366	136620001	1346	Roche	39.4211	30.5722	31.62	Modified
1366	136620001	1347	Roche	16.6159	14.54	15.714	Crystalin
1366	136620001	1348	Roche	20.3838	10.4419	12.8264	Mutual
1366	136620001	1349	Roche	23.6056	12.868	18.2926	Remobilized
1366	136620001	135	Roche	22.5057	16.8713	19.7976	Pristine	Mutual		0	0	0	0	0	0	0	0	0	0	0	0	0	0	0	0	0	0	0	0	0
1366	136620001	1350	Roche	30.8773	27.5964	28.6031	Reshaped
1366	136620001	1351	Roche	22.4762	12.3554	16.8665	Mutual
1366	136620001	1352	Roche	19.0955	12.2096	14.9739	Crystalin
1366	136620001	1353	Roche	17.2962	12.9834	14.9687	Mutual
1366	136620001	1354	Roche	38.7769	17.2874	23.6053	Intergranular
1366	136620001	1355	Roche	23.4846	10.6599	15.0909	Mutual
1366	136620001	1356	Roche	19.3756	12.7153	15.7779	Mutual
1366	136620001	1357	Roche	24.2863	20.6772	22.8006	Reshaped
1366	136620001	1358	Roche	38.2559	32.6363	31.4819	Modified
1366	136620001	1359	Roche	28.6976	14.2653	18.943	Modified
1366	136620001	136	Roche	34.9814	23.8483	27.5497	Modified			0	0	0	0	0	0	0	0	0	0	0	0	0	0	0	0	0	0	0	0	0
1366	136620001	1360	Roche	27.5098	24.535	25.8341	Modified
1366	136620001	1361	Roche	23.3925	20.296	19.443	Modified
1366	136620001	1362	Roche	20.2986	19.1757	18.9134	Crystalin
1366	136620001	1363	Roche	18.7936	13.9658	14.7742	Mutual
1366	136620001	1364	Roche	19.0857	18.8794	17.3629	Crystalin
1366	136620001	1365	Roche	28.7325	26.261	26.1189	Modified
1366	136620001	1366	Roche	36.9318	20.3651	26.3937	Modified
1366	136620001	1367	Roche	29.3789	17.8988	22.6496	Reshaped
1366	136620001	1368	Roche	11.0943	10.9277	10.9406	Mutual
1366	136620001	1369	Roche	26.0982	16.819	20.7889	Modified
1366	136620001	137	Roche	29.6101	27.7904	29.0359	Reshaped			0	0	0	0	0	0	0	0	0	0	0	0	0	0	0	0	0	0	0	0	0
1366	136620001	1370	Roche	20.2209	13.7818	16.671	Mutual
1366	136620001	1371	Roche	15.2717	11.9668	13.0428	Mutual
1366	136620001	1372	Roche	34.7258	16.1122	20.7738	Intergranular
1366	136620001	1373	Roche	19.6426	18.1378	18.9628	Reshaped
1366	136620001	1374	Roche	17.9744	7.70828	11.3021	Mutual
1366	136620001	1375	Roche	18.4976	10.4406	13.2332	Crystalin
1366	136620001	1376	Roche	21.9327	13.4127	16.77	Mutual
1366	136620001	1377	Roche	30.223	27.8007	28.3649	Modified
1366	136620001	1378	Roche	42.1211	22.5757	27.5086	Intergranular
1366	136620001	1379	Roche	23.9331	16.3004	18.7375	Remobilized
1366	136620001	138	Roche	22.2196	21.3907	21.619	Reshaped			0	0	0	0	0	0	0	0	0	0	0	0	0	0	0	0	0	0	0	0	0
1366	136620001	1380	Roche	28.769	24.7245	26.1696	Modified
1366	136620001	1381	Roche	14.7783	7.64294	10.8467	Mutual
1366	136620001	1382	Roche	18.3199	12.7782	15.0628	Mutual
1366	136620001	1383	Roche	26.1089	17.8269	21.7416	Modified
1366	136620001	1384	Roche	29.3153	23.902	26.3386	Modified
1366	136620001	1385	Roche	22.1731	20.4963	21.1003	Reshaped
1366	136620001	1386	Roche	66.6752	27.0852	41.2089	Modified
1366	136620001	1387	Roche	51.1714	32.8731	41.3187	Modified
1366	136620001	1388	Roche	33.2223	20.8949	24.6739	Modified
1366	136620001	1389	Roche	18.6766	18.1493	17.7324	Modified
1366	136620001	139	Roche	42.5573	28.6916	35.1811	Reshaped			0	0	0	0	0	0	0	0	0	0	0	0	0	0	0	0	0	0	0	0	0
1366	136620001	1390	Roche	18.9274	12.4868	14.8366	Intergranular
1366	136620001	1391	Roche	26.5109	21.6298	21.3732	Modified
1366	136620001	1392	Roche	14.4946	8.3037	10.1153	Intergranular
1366	136620001	1393	Roche	29.2067	27.7314	28.0643	Modified
1366	136620001	1394	Roche	16.0845	13.4121	14.4201	Mutual
1366	136620001	1395	Roche	18.7448	15.6844	16.8537	Modified
1366	136620001	1396	Roche	23.8265	14.6212	17.9647	Intergranular
1366	136620001	1397	Roche	29.0338	21.871	25.1131	Modified
1366	136620001	1398	Roche	19.1271	13.1092	15.228	Mutual
1366	136620001	1399	Roche	31.6142	29.9146	30.7956	Modified
1366	136620001	14	Roche	23.3308	21.8482	22.4178	Reshaped		2020-06-04		0	100	0	0	0	0	0	0	0	0	0	0	0	0	0	0	0	0	0	100
1366	136620001	140	Roche	33.907	18.5299	24.4947	Modified			0	0	0	0	0	0	0	0	0	0	0	0	0	0	0	0	0	0	0	0	0
1366	136620001	1400	Roche	38.3277	10.0657	16.595	Intergranular
1366	136620001	1401	Roche	19.547	18.1614	18.0736	Modified
1366	136620001	1402	Roche	28.4522	14.0467	18.7361	Mutual
1366	136620001	1403	Roche	18.1088	17.5551	16.3728	Modified
1366	136620001	1404	Roche	34.6575	31.6804	28.9226	Intergranular
1366	136620001	1405	Roche	23.9875	20.5534	21.6635	Crystalin
1366	136620001	1406	Roche	23.0866	16.6427	19.3028	Mutual
1366	136620001	1407	Roche	38.2756	27.1887	31.5235	Modified
1366	136620001	1408	Roche	26.1333	15.684	18.7138	Modified
1366	136620001	1409	Roche	31.3913	18.5065	22.8822	Intergranular
1366	136620001	141	Roche	25.4543	18.5802	20.81	Modified			0	0	0	0	0	0	0	0	0	0	0	0	0	0	0	0	0	0	0	0	0
1366	136620001	1410	Roche	27.0192	20.981	22.8584	Crystalin
1366	136620001	1411	Roche	22.326	18.4451	19.3133	Reshaped
1366	136620001	1412	Roche	33.8368	17.6479	23.4134	Reshaped
1366	136620001	1413	Roche	22.7128	15.2733	18.2318	Reshaped
1366	136620001	1414	Roche	15.9541	14.8097	14.9728	Mutual
1366	136620001	1415	Roche	18.9013	11.5121	13.7781	Mutual
1366	136620001	1416	Roche	30.0661	26.8534	26.8117	Modified
1366	136620001	1417	Roche	28.0548	24.7488	26.2905	Reshaped
1366	136620001	1418	Roche	14.9185	14.6951	14.6632	Mutual
1366	136620001	1419	Roche	31.3929	17.0409	19.979	Intergranular
1366	136620001	142	Roche	20.6578	17.2079	19.22	Reshaped			0	0	0	0	0	0	0	0	0	0	0	0	0	0	0	0	0	0	0	0	0
1366	136620001	1420	Roche	32.1251	23.6503	25.4993	Intergranular
1366	136620001	1421	Roche	30.5216	29.1525	29.026	Modified
1366	136620001	1422	Roche	26.5865	15.5266	19.6727	Intergranular
1366	136620001	1423	Roche	24.9612	21.6139	23.7932	Modified
1366	136620001	1424	Roche	18.1779	13.7815	14.8596	Mutual
1366	136620001	1425	Roche	28.5472	27.4002	28.3379	Remobilized
1366	136620001	1426	Roche	24.7476	23.8447	23.9009	Reshaped
1366	136620001	1427	Roche	27.6981	23.5248	22.7042	Remobilized
1366	136620001	1428	Roche	24.2181	13.6374	17.6444	Mutual
1366	136620001	1429	Roche	31.8401	16.2131	20.8747	Mutual
1366	136620001	143	Roche	12.8707	12.727	12.9131	Pristine	Mutual		0	0	0	0	0	0	0	0	0	0	0	0	0	0	0	0	0	0	0	0	0
1366	136620001	1430	Roche	16.1047	11.5759	13.3132	Mutual
1366	136620001	1431	Roche	28.9136	17.8985	22.2521	Intergranular
1366	136620001	1432	Roche	18.887	16.0673	16.9319	Mutual
1366	136620001	1433	Roche	34.3874	24.8095	26.4114	Modified
1366	136620001	1434	Roche	22.3475	12.6598	16.9633	Mutual
1366	136620001	1435	Roche	16.7375	13.3552	14.4201	Mutual
1366	136620001	1436	Roche	25.6366	14.3775	18.3829	Modified
1366	136620001	1437	Roche	31.127	21.3382	24.1269	Modified
1366	136620001	1438	Roche	25.5157	15.7692	19.1704	Modified
1366	136620001	1439	Roche	47.7845	31.5792	36.9908	Modified
1366	136620001	144	Roche	25.3825	19.216	21.3989	Modified			0	0	0	0	0	0	0	0	0	0	0	0	0	0	0	0	0	0	0	0	0
1366	136620001	1440	Roche	34.1685	16.9408	20.4531	Modified
1366	136620001	1441	Roche	17.1055	13.4022	14.2802	Mutual
1366	136620001	1442	Roche	24.4824	15.2674	18.6283	Remobilized
1366	136620001	1443	Roche	14.3642	12.5152	13.3619	Mutual
1366	136620001	1444	Roche	32.8547	14.1668	20.417	Remobilized
1366	136620001	1445	Roche	32.8245	17.077	22.0168	Modified
1366	136620001	1446	Roche	25.0949	17.2186	20.6721	Crystalin
1366	136620001	1447	Roche	20.7758	17.6198	18.9294	Mutual
1366	136620001	1448	Roche	14.9583	12.0428	13.2316	Mutual
1366	136620001	1449	Roche	26.1345	25.97	25.3567	Mutual
1366	136620001	145	Roche	31.1513	22.4762	25.7525	Modified			0	0	0	0	0	0	0	0	0	0	0	0	0	0	0	0	0	0	0	0	0
1366	136620001	1450	Roche	23.6378	20.6139	21.6361	Reshaped
1366	136620001	1451	Roche	27.5643	20.0492	23.6692	Reshaped
1366	136620001	1452	Roche	29.9223	22.8191	24.3836	Modified
1366	136620001	1453	Roche	15.6857	14.202	14.8673	Mutual
1366	136620001	1454	Roche	25.8464	20.137	22.7562	Modified
1366	136620001	1455	Roche	19.0433	15.9746	17.1596	Crystalin
1366	136620001	1456	Roche	16.4773	12.088	13.5511	Mutual
1366	136620001	1457	Roche	31.7633	26.197	28.7815	Crystalin
1366	136620001	1458	Roche	35.4595	22.0958	27.0829	Intergranular
1366	136620001	1459	Roche	31.6254	21.0967	25.4263	Modified
1366	136620001	146	Roche	44.0145	40.7615	41.7947	Modified			0	0	0	0	0	0	0	0	0	0	0	0	0	0	0	0	0	0	0	0	0
1366	136620001	1460	Roche	15.25	14.4975	14.9109	Mutual
1366	136620001	1461	Roche	16.4446	12.0568	14.5809	Crystalin
1366	136620001	1462	Roche	24.1971	19.3708	20.9556	Modified
1366	136620001	1463	Roche	15.4595	14.9803	14.7269	Modified
1366	136620001	1464	Roche	29.5604	23.9714	25.7804	Modified
1366	136620001	1465	Roche	20.3543	12.1754	14.2327	Remobilized
1366	136620001	1466	Roche	33.6252	21.1228	23.9388	Modified
1366	136620001	1467	Roche	39.8525	27.1422	32.264	Modified
1366	136620001	1468	Roche	41.5207	33.8788	37.0983	Modified
1366	136620001	1469	Roche	27.0741	24.1544	25.5206	Modified
1366	136620001	147	Roche	49.3789	39.084	44.7596	Modified			0	0	0	0	0	0	0	0	0	0	0	0	0	0	0	0	0	0	0	0	0
1366	136620001	1470	Roche	21.0625	17.6381	19.2709	Modified
1366	136620001	1471	Roche	30.0864	12.5473	17.9463	Crystalin
1366	136620001	1472	Roche	23.3017	15.9791	14.3666	Crystalin
1366	136620001	1473	Roche	22.6954	16.3195	18.6861	Crystalin
1366	136620001	1474	Roche	26.0769	11.4126	16.7434	Crystalin
1366	136620001	1475	Roche	23.888	23.1682	22.7552	Modified
1366	136620001	1476	Roche	18.1772	15.2665	16.1907	Mutual
1366	136620001	1477	Roche	44.2075	19.1121	26.1815	Modified
1366	136620001	1478	Roche	29.5468	18.4918	23.1268	Modified
1366	136620001	1479	Roche	16.8197	13.7194	14.0178	Remobilized
1366	136620001	148	Roche	30.5868	17.0986	22.5825	Modified			0	0	0	0	0	0	0	0	0	0	0	0	0	0	0	0	0	0	0	0	0
1366	136620001	1480	Roche	20.28	19.964	20.3601	Crystalin
1366	136620001	1481	Roche	17.5204	14.5331	15.3094	Crystalin
1366	136620001	1482	Roche	16.1377	15.4916	15.0054	Remobilized
1366	136620001	1483	Roche	31.1309	12.1466	18.8907	Crystalin
1366	136620001	1484	Roche	25.8033	16.6074	19.5322	Remobilized
1366	136620001	1485	Roche	34.4718	18.0363	23.4524	Remobilized
1366	136620001	1486	Roche	21.5164	21.4901	21.1866	Modified
1366	136620001	1487	Roche	21.2655	11.6328	14.8362	Mutual
1366	136620001	1488	Roche	41.5253	16.8614	25.2465	Crystalin
1366	136620001	1489	Roche	33.9039	14.9588	20.7844	Remobilized
1366	136620001	149	Roche	30.4878	22.067	25.4457	Modified			0	0	0	0	0	0	0	0	0	0	0	0	0	0	0	0	0	0	0	0	0
1366	136620001	1490	Roche	12.4617	10.4044	11.1171	Mutual
1366	136620001	1491	Roche	13.7035	13.6517	11.892	Crystalin
1366	136620001	1492	Roche	22.2302	13.8207	16.9081	Crystalin
1366	136620001	1493	Roche	23.8047	13.5848	16.3741	Crystalin
1366	136620001	1494	Roche	32.6478	13.9192	21.5186	Modified
1366	136620001	1495	Roche	23.5454	16.6031	18.4917	Intergranular
1366	136620001	1496	Roche	23.0449	18.8991	20.5082	Mutual
1366	136620001	1497	Roche	40.5294	29.1839	33.5449	Modified
1366	136620001	1498	Roche	30.8044	24.2498	25.8169	Modified
1366	136620001	1499	Roche	15.5283	8.53389	10.9737	Intergranular
1366	136620001	15	Roche	37.3981	26.5298	31.7129	Modified		2020-06-04		0	100	0	0	0	0	0	0	0	0	0	0	0	0	0	0	0	0	0	100
1366	136620001	150	Roche	32.0289	20.1099	25.2757	Pristine	Mutual		0	0	0	0	0	0	0	0	0	0	0	0	0	0	0	0	0	0	0	0	0
1366	136620001	1500	Roche	28.6221	16.8071	21.164	Modified
1366	136620001	1501	Roche	23.8988	18.3052	20.6181	Mutual
1366	136620001	1502	Roche	17.8265	15.1759	16.0385	Modified
1366	136620001	1503	Roche	22.5966	14.4353	17.86	Modified
1366	136620001	1504	Roche	13.0069	11.6606	11.8517	Crystalin
1366	136620001	1505	Roche	24.8863	16.1755	19.3048	Intergranular
1366	136620001	1506	Roche	44.1985	27.6212	34.0391	Remobilized
1366	136620001	1507	Roche	19.0218	16.647	17.5876	Remobilized
1366	136620001	1508	Roche	25.7503	20.9868	21.679	Modified
1366	136620001	1509	Roche	34.4226	16.7087	23.7594	Remobilized
1366	136620001	151	Roche	15.5179	15.0903	15.1393	Pristine	Mutual		0	0	0	0	0	0	0	0	0	0	0	0	0	0	0	0	0	0	0	0	0
1366	136620001	1510	Roche	23.9632	17.0289	19.6546	Modified
1366	136620001	1511	Roche	17.1675	13.5228	14.8058	Mutual
1366	136620001	1512	Roche	17.309	10.7222	12.8529	Crystalin
1366	136620001	1513	Roche	15.9042	13.2229	14.3742	Mutual
1366	136620001	1514	Roche	31.4908	27.7218	29.3838	Reshaped
1366	136620001	1515	Roche	17.5348	15.7485	16.8883	Mutual
1366	136620001	1516	Roche	28.6714	23.8623	26.8612	Modified
1366	136620001	1517	Roche	35.5681	32.1681	34.43	Reshaped
1366	136620001	1518	Roche	35.0927	21.7583	27.2594	Modified
1366	136620001	1519	Roche	55.9271	19.5713	29.5199	Modified
1366	136620001	152	Roche	38.8797	29.7904	30.7023	Pristine	Remobilized		0	0	0	0	0	0	0	0	0	0	0	0	0	0	0	0	0	0	0	0	0
1366	136620001	1520	Roche	22.7597	16.3957	18.3601	Mutual
1366	136620001	1521	Roche	31.5249	27.0085	27.6364	Modified
1366	136620001	1522	Roche	20.9432	15.0329	17.5666	Modified
1366	136620001	1523	Roche	21.0847	17.1579	18.2405	Crystalin
1366	136620001	1524	Roche	26.4194	20.1103	23.1132	Reshaped
1366	136620001	1525	Roche	33.0207	16.9211	22.3283	Modified
1366	136620001	1526	Roche	26.9926	13.3417	16.952	Intergranular
1366	136620001	1527	Roche	20.4648	13.3921	16.0529	Mutual
1366	136620001	1528	Roche	40.928	26.5159	31.3948	Remobilized
1366	136620001	1529	Roche	35.9983	24.2052	28.7536	Modified
1366	136620001	153	Roche	25.753	21.183	22.8259	Pristine	Crystalline		0	0	0	0	0	0	0	0	0	0	0	0	0	0	0	0	0	0	0	0	0
1366	136620001	1530	Roche	23.3976	10.6205	14.9529	Mutual
1366	136620001	1531	Roche	18.7089	17.8295	17.9301	Reshaped
1366	136620001	1532	Roche	32.4429	16.4012	23.0725	Modified
1366	136620001	1533	Roche	18.1543	13.2335	15.3342	Reshaped
1366	136620001	1534	Roche	33.0404	23.5696	25.8001	Intergranular
1366	136620001	1535	Roche	30.2312	19.9526	24.0808	Modified
1366	136620001	1536	Roche	15.7083	14.8224	14.831	Crystalin
1366	136620001	1537	Roche	27.6082	14.0043	18.854	Crystalin
1366	136620001	1538	Roche	25.4095	22.746	24.2669	Crystalin
1366	136620001	1539	Roche	29.7438	24.9822	26.4055	Modified
1366	136620001	154	Roche	29.8772	20.4996	24.134	Pristine	Remobilized		0	0	0	0	0	0	0	0	0	0	0	0	0	0	0	0	0	0	0	0	0
1366	136620001	1540	Roche	25.8016	14.9985	19.4552	Modified
1366	136620001	1541	Roche	17.7375	14.5578	16.1336	Crystalin
1366	136620001	1542	Roche	25.1802	18.6155	21.5791	Reshaped
1366	136620001	1543	Roche	30.3138	23.619	26.9756	Modified
1366	136620001	1544	Roche	25.9144	20.9729	23.0842	Modified
1366	136620001	1545	Roche	20.2409	13.9002	16.0916	Mutual
1366	136620001	1546	Roche	37.5661	17.4671	25.0442	Modified
1366	136620001	1547	Roche	18.1115	14.1223	15.1759	Intergranular
1366	136620001	1548	Roche	28.2634	17.5214	19.6218	Intergranular
1366	136620001	1549	Roche	13.144	8.93792	10.2857	Mutual
1366	136620001	155	Roche	32.7942	26.0144	27.6714	Modified			0	0	0	0	0	0	0	0	0	0	0	0	0	0	0	0	0	0	0	0	0
1366	136620001	1550	Roche	26.0735	19.5054	20.9551	Modified
1366	136620001	1551	Roche	15.3251	12.7491	14.2652	Mutual
1366	136620001	1552	Roche	27.1113	18.0491	20.382	Modified
1366	136620001	1553	Roche	32.4408	18.4281	22.3022	Modified
1366	136620001	1554	Roche	25.8093	22.5384	23.8604	Modified
1366	136620001	1555	Roche	16.2632	8.1793	10.8219	Mutual
1366	136620001	1556	Roche	14.2177	10.1611	10.1175	Mutual
1366	136620001	1557	Roche	31.8889	21.5527	23.9055	Modified
1366	136620001	1558	Roche	19.2533	6.84993	11.2303	Mutual
1366	136620001	1559	Roche	28.843	15.1317	20.7128	Modified
1366	136620001	156	Roche	40.0026	15.5218	24.9809	Modified			0	0	0	0	0	0	0	0	0	0	0	0	0	0	0	0	0	0	0	0	0
1366	136620001	1560	Roche	22.5919	21.9706	21.7294	Reshaped
1366	136620001	1561	Roche	29.8413	27.6794	27.7944	Modified
1366	136620001	1562	Roche	18.1861	15.4263	16.169	Modified
1366	136620001	1563	Roche	29.0716	18.9497	22.6404	Reshaped
1366	136620001	1565	Roche	61.5705	19.4052	33.767	Crystalin
1366	136620001	1566	Roche	26.3704	16.0897	13.4864	Intergranular
1366	136620001	1567	Roche	33.7384	20.4135	25.3537	Modified
1366	136620001	1568	Roche	29.8839	22.4454	23.7456	Modified
1366	136620001	1569	Roche	21.9768	21.2144	21.0669	Modified
1366	136620001	157	Roche	17.6901	17.4287	17.5901	Pristine	Mutual		0	0	0	0	0	0	0	0	0	0	0	0	0	0	0	0	0	0	0	0	0
1366	136620001	1570	Roche	22.6862	18.4051	19.2891	Modified
1366	136620001	1571	Roche	23.9247	23.4883	23.6518	Modified
1366	136620001	1572	Roche	13.1588	8.24348	9.52392	Intergranular
1366	136620001	1573	Roche	18.8032	9.75055	12.7451	Mutual
1366	136620001	1574	Roche	21.6542	15.8086	18.7768	Reshaped
1366	136620001	1575	Roche	22.3015	19.5797	19.9801	Remobilized
1366	136620001	1576	Roche	23.3461	15.0641	18.2309	Remobilized
1366	136620001	1577	Roche	33.7534	15.6901	21.8654	Modified
1366	136620001	1578	Roche	36.8128	23.718	29.1625	Modified
1366	136620001	1579	Roche	24.4478	19.4531	21.3799	Remobilized
1366	136620001	158	Roche	34.3269	22.2603	26.314	Pristine	Crystalline		0	0	0	0	0	0	0	0	0	0	0	0	0	0	0	0	0	0	0	0	0
1366	136620001	1580	Roche	25.7732	16.1238	19.9649	Modified
1366	136620001	1581	Roche	32.1714	18.7094	23.3294	Remobilized
1366	136620001	1582	Roche	39.3972	32.372	31.9392	Remobilized
1366	136620001	1583	Roche	39.9151	19.0245	27.1961	Modified
1366	136620001	1584	Roche	26.1687	17.8823	21.0697	Modified
1366	136620001	1585	Roche	25.8457	22.2879	23.6878	Reshaped
1366	136620001	1586	Roche	20.519	18.2021	18.3376	Modified
1366	136620001	1587	Roche	39.4966	21.7314	28.4353	Remobilized
1366	136620001	1588	Roche	38.8547	33.5644	35.1478	Modified
1366	136620001	1589	Roche	23.8895	12.6125	17.7383	Modified
1366	136620001	159	Roche	28.3107	24.9602	25.6663	Pristine	Remobilized		0	0	0	0	0	0	0	0	0	0	0	0	0	0	0	0	0	0	0	0	0
1366	136620001	1590	Roche	14.5436	12.6079	13.5499	Mutual
1366	136620001	1591	Roche	44.0432	34.7873	38.1512	Modified
1366	136620001	1592	Roche	24.8768	15.1859	17.9528	Intergranular
1366	136620001	1593	Roche	29.9683	21.0304	24.1932	Modified
1366	136620001	1594	Roche	17.9503	13.6685	14.8166	Crystalin
1366	136620001	1595	Roche	25.4523	21.7647	23.447	Reshaped
1366	136620001	1596	Roche	17.1055	15.5772	16.5069	Mutual
1366	136620001	1597	Roche	29.8045	18.5634	22.8998	Modified
1366	136620001	1598	Roche	25.3985	20.5635	22.5664	Modified
1366	136620001	1599	Roche	18.2101	10.4758	12.1042	Intergranular
1366	136620001	16	Roche	24.9085	20.1684	21.9888	Reshaped		2020-06-04		2.76108	97.2389	0	0	0	0	0	0	0	0	0	0	0	0	0	0	0	0	0	100
1366	136620001	160	Roche	35.0919	31.372	32.3831	Reshaped			0	0	0	0	0	0	0	0	0	0	0	0	0	0	0	0	0	0	0	0	0
1366	136620001	1600	Roche	16.0885	13.8262	13.7964	Mutual
1366	136620001	1601	Roche	40.2172	24.0126	28.452	Modified
1366	136620001	1602	Roche	28.1321	23.7617	25.2955	Modified
1366	136620001	1603	Roche	27.8523	22.446	22.6761	Intergranular
1366	136620001	1604	Roche	24.2061	12.5405	16.7382	Remobilized
1366	136620001	1605	Roche	34.352	29.8002	31.588	Modified
1366	136620001	1606	Roche	13.9861	13.0119	13.4062	Mutual
1366	136620001	1607	Roche	17.0242	14.246	15.5564	Crystalin
1366	136620001	1608	Roche	23.303	13.7425	17.9684	Mutual
1366	136620001	1609	Roche	11.7925	10.0448	10.4306	Mutual
1366	136620001	161	Roche	35.3976	22.7001	26.7523	Modified			0	0	0	0	0	0	0	0	0	0	0	0	0	0	0	0	0	0	0	0	0
1366	136620001	1610	Roche	16.3939	14.6731	15.3191	Modified
1366	136620001	1611	Roche	21.725	15.3126	17.5701	Crystalin
1366	136620001	1612	Roche	34.5173	25.3416	28.4804	Modified
1366	136620001	1613	Roche	30.8568	26.6744	29.1102	Reshaped
1366	136620001	1614	Roche	24.4108	22.059	22.1609	Remobilized
1366	136620001	1615	Roche	26.9288	12.0719	18.2893	Mutual
1366	136620001	1616	Roche	30.0912	9.75661	16.3048	Modified
1366	136620001	1617	Roche	27.8507	19.7408	22.2582	Modified
1366	136620001	1618	Roche	43.8364	27.9844	34.021	Modified
1366	136620001	1619	Roche	19.6708	16.7301	17.7906	Modified
1366	136620001	162	Roche	30.641	21.3437	25.6066	Modified			0	0	0	0	0	0	0	0	0	0	0	0	0	0	0	0	0	0	0	0	0
1366	136620001	1620	Roche	28.471	17.307	20.7645	Intergranular
1366	136620001	1621	Roche	16.2986	10.7781	13.0158	Mutual
1366	136620001	1622	Roche	17.533	14.583	16.1676	Modified
1366	136620001	1623	Roche	25.5668	17.458	20.2404	Modified
1366	136620001	1624	Roche	29.1731	19.3217	21.3003	Intergranular
1366	136620001	1625	Roche	36.4172	25.9215	30.2717	Modified
1366	136620001	1626	Roche	29.0236	14.7848	18.8986	Modified
1366	136620001	1627	Roche	18.4037	16.8899	17.5092	Remobilized
1366	136620001	1628	Roche	24.1339	17.3098	20.0284	Modified
1366	136620001	1629	Roche	27.4674	23.0448	24.704	Modified
1366	136620001	163	Roche	28.6405	20.3385	22.3529	Modified			0	0	0	0	0	0	0	0	0	0	0	0	0	0	0	0	0	0	0	0	0
1366	136620001	1630	Roche	27.6138	20.2704	23.9916	Reshaped
1366	136620001	1631	Roche	34.761	15.7128	22.8283	Modified
1366	136620001	1632	Roche	24.2135	22.129	22.2449	Modified
1366	136620001	1633	Roche	32.065	18.2167	23.3624	Modified
1366	136620001	1634	Roche	20.5596	17.7165	18.6029	Crystalin
1366	136620001	1635	Roche	19.251	16.2537	17.5089	Crystalin
1366	136620001	1636	Roche	26.2719	20.3569	23.2924	Modified
1366	136620001	1637	Roche	38.8171	28.18	30.3783	Intergranular
1366	136620001	1638	Roche	24.7554	20.7472	22.5008	Modified
1366	136620001	1639	Roche	37.329	26.9452	30.3975	Modified
1366	136620001	164	Roche	30.5538	28.9515	29.591	Pristine	Remobilized		0	0	0	0	0	0	0	0	0	0	0	0	0	0	0	0	0	0	0	0	0
1366	136620001	1640	Roche	22.5454	16.6493	19.1012	Reshaped
1366	136620001	1641	Roche	26.2305	20.3123	23.1736	Modified
1366	136620001	1642	Roche	20.8141	16.2731	18.1789	Crystalin
1366	136620001	1643	Roche	20.3835	19.0997	19.234	Reshaped
1366	136620001	1644	Roche	29.5104	14.7719	17.785	Intergranular
1366	136620001	1645	Roche	16.1862	11.8959	13.4644	Mutual
1366	136620001	1646	Roche	20.0362	15.0141	17.1073	Mutual
1366	136620001	1647	Roche	46.2048	25.9049	33.0306	Modified
1366	136620001	1648	Roche	18.8638	14.0439	15.6185	Intergranular
1366	136620001	1649	Roche	26.8269	23.8531	24.4502	Intergranular
1366	136620001	165	Roche	30.5048	19.09	24.172	Modified			0	0	0	0	0	0	0	0	0	0	0	0	0	0	0	0	0	0	0	0	0
1366	136620001	1650	Roche	22.7977	21.0232	19.794	Intergranular
1366	136620001	1651	Roche	25.041	10.0517	15.3453	Intergranular
1366	136620001	1652	Roche	17.8525	17.3555	16.4532	Intergranular
1366	136620001	1653	Roche	25.9378	25.0238	24.3978	Modified
1366	136620001	1654	Roche	26.6089	16.8048	19.573	Crystalin
1366	136620001	1655	Roche	13.596	7.06843	9.33437	Mutual
1366	136620001	1656	Roche	24.4484	23.3688	23.8378	Crystalin
1366	136620001	1657	Roche	31.3831	20.2187	23.1237	Crystalin
1366	136620001	1658	Roche	26.1165	16.7874	19.3139	Modified
1366	136620001	1659	Roche	36.8435	10.2312	18.1774	Modified
1366	136620001	166	Roche	37.7233	19.716	25.8113	Modified			0	0	0	0	0	0	0	0	0	0	0	0	0	0	0	0	0	0	0	0	0
1366	136620001	1660	Roche	12.1442	9.27792	10.5089	Mutual
1366	136620001	1661	Roche	32.5269	15.5777	21.698	Crystalin
1366	136620001	1662	Roche	36.5304	21.5793	27.3484	Modified
1366	136620001	1663	Roche	13.4221	12.3881	12.8824	Crystalin
1366	136620001	1664	Roche	29.1853	18.2689	23.4433	Modified
1366	136620001	1665	Roche	24.9905	20.5841	22.6025	Mutual
1366	136620001	1666	Roche	23.9716	16.6322	19.2166	Modified
1366	136620001	1667	Roche	18.457	13.533	15.8959	Crystalin
1366	136620001	1668	Roche	48.6172	26.0398	34.4692	Modified
1366	136620001	1669	Roche	22.904	17.816	20.1963	Crystalin
1366	136620001	167	Roche	22.3364	17.2694	18.4914	Pristine	Remobilized		0	0	0	0	0	0	0	0	0	0	0	0	0	0	0	0	0	0	0	0	0
1366	136620001	1670	Roche	25.066	21.6376	22.3689	Modified
1366	136620001	1671	Roche	32.7019	27.3151	29.4451	Crystalin
1366	136620001	1672	Roche	16.8319	16.6119	16.7125	Reshaped
1366	136620001	1673	Roche	23.4264	20.4103	21.1206	Modified
1366	136620001	1674	Roche	18.833	15.4951	17.6774	Reshaped
1366	136620001	1675	Roche	21.2003	15.2097	17.6023	Modified
1366	136620001	1676	Roche	23.7375	20.9636	19.7567	Remobilized
1366	136620001	1677	Roche	28.2114	15.5996	20.9462	Modified
1366	136620001	1678	Roche	19.1316	17.5305	18.5757	Reshaped
1366	136620001	1679	Roche	41.0093	23.5278	27.1082	Modified
1366	136620001	168	Roche	33.2104	23.1853	26.8713	Modified			0	0	0	0	0	0	0	0	0	0	0	0	0	0	0	0	0	0	0	0	0
1366	136620001	1680	Roche	28.2087	22.3276	24.0203	Modified
1366	136620001	1681	Roche	14.3992	14.0856	14.2567	Reshaped
1366	136620001	1682	Roche	19.9479	13.3592	15.3815	Intergranular
1366	136620001	1683	Roche	30.2378	10.8972	17.4331	Mutual
1366	136620001	1684	Roche	32.1812	30.5787	29.6941	Modified
1366	136620001	1685	Roche	28.4796	19.4211	22.4479	Modified
1366	136620001	1686	Roche	20.5502	11.0847	14.6569	Crystalin
1366	136620001	1687	Roche	21.4924	17.5839	19.3093	Modified
1366	136620001	1688	Roche	26.762	14.7629	19.0602	Intergranular
1366	136620001	1689	Roche	18.7219	12.3986	14.9352	Crystalin
1366	136620001	169	Roche	19.7247	19.0071	19.282	Pristine	Mutual		0	0	0	0	0	0	0	0	0	0	0	0	0	0	0	0	0	0	0	0	0
1366	136620001	1690	Roche	17.4774	12.0644	14.6719	Mutual
1366	136620001	1691	Roche	19.2051	8.47763	12.8221	Mutual
1366	136620001	1692	Roche	28.2528	16.3694	21.3889	Intergranular
1366	136620001	1693	Roche	27.2915	18.0141	22.3056	Crystalin
1366	136620001	1694	Roche	70.4624	31.1027	38.2303	Remobilized
1366	136620001	1695	Roche	22.5784	18.8144	18.9732	Modified
1366	136620001	1696	Roche	26.1977	17.1682	19.9401	Modified
1366	136620001	1697	Roche	21.3223	19.6481	19.4908	Modified
1366	136620001	1698	Roche	28.4775	17.0377	21.093	Modified
1366	136620001	1699	Roche	21.7909	20.024	19.6713	Intergranular
1366	136620001	17	Roche	20.2045	16.5959	17.1163	Modified		2020-06-04		0	100	0	0	0	0	0	0	0	0	0	0	0	0	0	0	0	0	0	100
1366	136620001	170	Roche	30.8412	19.7995	24.7731	Modified			0	0	0	0	0	0	0	0	0	0	0	0	0	0	0	0	0	0	0	0	0
1366	136620001	1700	Roche	18.3282	13.5138	16.2216	Mutual
1366	136620001	1701	Roche	16.8471	14.4966	15.2064	Crystalin
1366	136620001	1702	Roche	38.6619	25.4329	30.4806	Reshaped
1366	136620001	1703	Roche	24.3102	17.947	19.5634	Modified
1366	136620001	1704	Roche	17.4815	10.9095	13.8838	Crystalin
1366	136620001	1705	Roche	22.0274	19.5429	20.4364	Crystalin
1366	136620001	1706	Roche	37.2334	14.5157	22.6022	Intergranular
1366	136620001	1707	Roche	23.4602	14.9174	17.464	Intergranular
1366	136620001	1708	Roche	39.7658	19.6486	26.8956	Modified
1366	136620001	1709	Roche	23.7947	10.9467	14.6685	Intergranular
1366	136620001	171	Roche	24.5037	19.4073	20.3447	Pristine	Intergranular		0	0	0	0	0	0	0	0	0	0	0	0	0	0	0	0	0	0	0	0	0
1366	136620001	1710	Roche	22.9209	21.8689	21.4833	Crystalin
1366	136620001	1711	Roche	44.8102	14.8941	22.1877	Intergranular
1366	136620001	1712	Roche	31.0681	27.5751	28.9902	Modified
1366	136620001	1713	Roche	50.7784	22.6617	30.6354	Intergranular
1366	136620001	1714	Roche	44.2562	20.3805	27.9878	Modified
1366	136620001	1715	Roche	28.4504	26.7457	27.4806	Modified
1366	136620001	1716	Roche	31.5914	20.4427	23.9466	Remobilized
1366	136620001	1717	Roche	18.9068	12.2456	15.2681	Crystalin
1366	136620001	1718	Roche	29.6056	14.1205	20.1268	Intergranular
1366	136620001	1719	Roche	26.492	18.2496	20.1571	Intergranular
1366	136620001	172	Roche	23.14	18.958	20.6551	Pristine	Crystalline		0	0	0	0	0	0	0	0	0	0	0	0	0	0	0	0	0	0	0	0	0
1366	136620001	1720	Roche	28.0991	17.2057	21.514	Modified
1366	136620001	1721	Roche	29.0116	18.3935	21.4866	Modified
1366	136620001	1722	Roche	28.0017	16.2283	22.2098	Mutual
1366	136620001	1723	Roche	17.6718	14.2293	15.7325	Crystalin
1366	136620001	1724	Roche	30.7553	21.934	25.5903	Crystalin
1366	136620001	1725	Roche	19.3867	17.7244	17.7206	Crystalin
1366	136620001	1726	Roche	22.4782	16.0895	19.138	Mutual
1366	136620001	1727	Roche	22.2986	20.8561	22.2434	Modified
1366	136620001	1728	Roche	22.8778	19.3434	19.0799	Intergranular
1366	136620001	1729	Roche	20.7143	13.5478	16.4435	Mutual
1366	136620001	173	Roche	45.9749	38.795	41.2918	Modified			0	0	0	0	0	0	0	0	0	0	0	0	0	0	0	0	0	0	0	0	0
1366	136620001	1730	Roche	21.5642	20.1596	19.1816	Intergranular
1366	136620001	1731	Roche	19.8474	17.2186	17.1856	Remobilized
1366	136620001	1732	Roche	34.6395	16.7197	24.0927	Remobilized
1366	136620001	1733	Roche	25.0509	24.6592	24.4496	Modified
1366	136620001	1734	Roche	33.5795	32.6817	31.2251	Remobilized
1366	136620001	1735	Roche	17.4112	6.93861	9.78761	Mutual
1366	136620001	1736	Roche	26.0692	25.36	25.0892	Modified
1366	136620001	1737	Roche	16.5809	15.7258	15.7527	Intergranular
1366	136620001	1738	Roche	22.2647	19.8028	20.2252	Modified
1366	136620001	1739	Roche	40.941	29.318	31.5088	Remobilized
1366	136620001	174	Roche	27.9764	24.0921	25.7979	Reshaped			0	0	0	0	0	0	0	0	0	0	0	0	0	0	0	0	0	0	0	0	0
1366	136620001	1740	Roche	32.1162	13.7385	19.8616	Mutual
1366	136620001	1741	Roche	36.259	28.121	29.6346	Modified
1366	136620001	1742	Roche	34.3723	22.9229	27.2594	Modified
1366	136620001	1743	Roche	12.1655	11.8287	11.0202	Intergranular
1366	136620001	1744	Roche	49.0561	27.9047	34.3223	Modified
1366	136620001	1745	Roche	25.3967	21.7998	21.9184	Intergranular
1366	136620001	1746	Roche	40.4955	21.1398	28.4187	Modified
1366	136620001	1747	Roche	37.5004	18.3015	23.871	Modified
1366	136620001	1748	Roche	24.8422	10.1209	15.7202	Mutual
1366	136620001	1749	Roche	31.6834	17.6345	23.633	Modified
1366	136620001	175	Roche	26.4182	25.7974	23.7071	Pristine	Intergranular		0	0	0	0	0	0	0	0	0	0	0	0	0	0	0	0	0	0	0	0	0
1366	136620001	1750	Roche	31.0669	21.4865	25.6948	Reshaped
1366	136620001	1751	Roche	40.1769	24.0012	29.3576	Modified
1366	136620001	1752	Roche	19.2027	11.1668	14.2366	Intergranular
1366	136620001	1753	Roche	23.8654	22.5722	22.8654	Reshaped
1366	136620001	1754	Roche	25.8821	16.7112	20.5258	Modified
1366	136620001	1755	Roche	35.5964	21.1536	25.6279	Modified
1366	136620001	1756	Roche	12.2262	11.0308	11.5832	Mutual
1366	136620001	1757	Roche	20.1174	15.9609	17.1314	Mutual
1366	136620001	1758	Roche	15.6581	14.8238	12.7615	Intergranular
1366	136620001	1759	Roche	20.3701	16.1508	17.435	Modified
1366	136620001	176	Roche	28.2089	15.3699	20.1393	Modified			0	0	0	0	0	0	0	0	0	0	0	0	0	0	0	0	0	0	0	0	0
1366	136620001	1760	Roche	43.9762	30.406	37.207	Modified
1366	136620001	1761	Roche	31.0762	10.9049	17.6933	Intergranular
1366	136620001	1762	Roche	39.844	27.2289	31.0979	Modified
1366	136620001	1763	Roche	27.2755	22.8735	23.6309	Intergranular
1366	136620001	1764	Roche	24.4568	23.3473	23.5095	Reshaped
1366	136620001	1765	Roche	23.0139	11.9503	16.593	Modified
1366	136620001	1766	Roche	18.4055	14.0742	16.4221	Mutual
1366	136620001	1767	Roche	27.6411	23.2237	25.4172	Modified
1366	136620001	1768	Roche	25.8903	15.0777	18.4793	Crystalin
1366	136620001	1769	Roche	33.2121	20.5099	25.7653	Modified
1366	136620001	177	Roche	19.8878	17.2068	17.88	Pristine	Mutual		0	0	0	0	0	0	0	0	0	0	0	0	0	0	0	0	0	0	0	0	0
1366	136620001	1770	Roche	27.1438	21.6694	23.5689	Modified
1366	136620001	1771	Roche	23.839	12.5027	16.1802	Modified
1366	136620001	1772	Roche	19.8985	19.8894	18.3784	Intergranular
1366	136620001	1773	Roche	47.9506	33.6984	39.0362	Crystalin
1366	136620001	1774	Roche	14.4439	14.2692	14.1572	Mutual
1366	136620001	1775	Roche	37.1786	19.4096	26.1824	Modified
1366	136620001	1776	Roche	35.8704	24.324	27.8319	Modified
1366	136620001	1777	Roche	20.6037	17.6485	18.4581	Modified
1366	136620001	1778	Roche	27.0089	14.9822	17.8505	Intergranular
1366	136620001	1779	Roche	21.7647	19.0421	19.7026	Crystalin
1366	136620001	178	Roche	30.6523	15.1619	20.2333	Pristine	Intergranular		0	0	0	0	0	0	0	0	0	0	0	0	0	0	0	0	0	0	0	0	0
1366	136620001	1780	Roche	40.495	15.7962	22.6727	Crystalin
1366	136620001	1781	Roche	27.4989	20.6465	22.9662	Modified
1366	136620001	1782	Roche	38.449	32.4835	32.31	Modified
1366	136620001	1783	Roche	11.3489	9.8187	10.5897	Mutual
1366	136620001	1784	Roche	33.5261	21.2273	27.2934	Modified
1366	136620001	1785	Roche	28.8968	11.5225	16.9029	Intergranular
1366	136620001	1786	Roche	49.1995	26.2314	33.3792	Modified
1366	136620001	1787	Roche	24.4347	20.6545	21.5809	Modified
1366	136620001	1788	Roche	12.6828	7.39555	9.52738	Mutual
1366	136620001	1789	Roche	27.6782	26.2065	24.9492	Modified
1366	136620001	179	Roche	50.1462	37.8362	39.7497	Modified			0	0	0	0	0	0	0	0	0	0	0	0	0	0	0	0	0	0	0	0	0
1366	136620001	1790	Roche	45.2375	30.5248	33.7482	Remobilized
1366	136620001	1791	Roche	28.7168	16.8763	19.6159	Intergranular
1366	136620001	1792	Roche	42.7106	18.6266	27.2636	Intergranular
1366	136620001	1793	Roche	31.5905	23.223	24.7946	Remobilized
1366	136620001	1794	Roche	11.6678	8.07881	9.39895	Mutual
1366	136620001	1795	Roche	42.4169	25.6166	29.9122	Modified
1366	136620001	1796	Roche	22.6605	14.6822	17.6447	Modified
1366	136620001	1797	Roche	21.0304	18.7959	20.0923	Reshaped
1366	136620001	1798	Roche	17.0358	16.4823	16.3021	Intergranular
1366	136620001	1799	Roche	22.6626	19.1651	20.852	Mutual
1366	136620001	18	Roche	38.5087	22.6105	28.6289	Modified		2020-06-04		0	100	0	0	0	0	0	0	0	0	0	0	0	0	0	0	0	0	0	100
1366	136620001	180	Roche	45.1304	25.6572	33.2406	Modified			0	0	0	0	0	0	0	0	0	0	0	0	0	0	0	0	0	0	0	0	0
1366	136620001	1800	Roche	16.4899	13.024	14.8943	Mutual
1366	136620001	1801	Roche	40.0551	18.5639	25.1612	Modified
1366	136620001	1802	Roche	31.0613	24.4527	27.806	Modified
1366	136620001	1803	Roche	17.4535	13.6398	14.9823	Modified
1366	136620001	1804	Roche	28.329	17.3479	21.9628	Crystalin
1366	136620001	1805	Roche	39.8704	20.9695	27.5344	Modified
1366	136620001	1806	Roche	40.8058	29.1956	31.6262	Modified
1366	136620001	1807	Roche	16.566	8.85959	11.7772	Mutual
1366	136620001	1808	Roche	17.7359	14.9282	15.3775	Crystalin
1366	136620001	1809	Roche	22.2676	15.9039	18.0121	Modified
1366	136620001	181	Roche	23.1012	21.2202	22.0472	Modified			0	0	0	0	0	0	0	0	0	0	0	0	0	0	0	0	0	0	0	0	0
1366	136620001	1810	Roche	25.5423	21.187	22.047	Modified
1366	136620001	1811	Roche	34.408	32.6292	31.8544	Modified
1366	136620001	1812	Roche	29.4007	20.6194	23.5376	Modified
1366	136620001	1813	Roche	27.0353	17.2742	20.329	Remobilized
1366	136620001	1814	Roche	43.3122	23.35	30.1222	Modified
1366	136620001	1815	Roche	26.0769	15.4613	17.961	Remobilized
1366	136620001	1816	Roche	47.1976	12.729	23.0568	Remobilized
1366	136620001	1817	Roche	19.2093	19.1424	18.0873	Intergranular
1366	136620001	1818	Roche	40.8317	29.8761	33.5233	Modified
1366	136620001	1819	Roche	29.0349	24.2373	26.0683	Modified
1366	136620001	182	Roche	22.4362	21.8786	21.8014	Modified			0	0	0	0	0	0	0	0	0	0	0	0	0	0	0	0	0	0	0	0	0
1366	136620001	1820	Roche	22.9193	21.3281	22.5384	Modified
1366	136620001	1821	Roche	34.6514	20.3426	24.2774	Modified
1366	136620001	1822	Roche	32.5632	18.4394	23.6572	Modified
1366	136620001	1823	Roche	37.3268	26.3877	30.2135	Remobilized
1366	136620001	1824	Roche	38.9064	37.1259	37.0978	Modified
1366	136620001	1825	Roche	48.202	22.3994	30.5322	Remobilized
1366	136620001	1826	Roche	14.9935	12.1853	13.3512	Mutual
1366	136620001	1827	Roche	37.9248	14.9181	21.9355	Modified
1366	136620001	1828	Roche	15.7977	15.113	15.2024	Crystalin
1366	136620001	1829	Roche	26.2673	16.0354	19.4444	Mutual
1366	136620001	183	Roche	54.0871	41.4124	45.7532	Pristine	Intergranular		0	0	0	0	0	0	0	0	0	0	0	0	0	0	0	0	0	0	0	0	0
1366	136620001	1830	Roche	24.8059	18.6926	20.7088	Modified
1366	136620001	1831	Roche	28.2121	18.8009	23.4629	Modified
1366	136620001	1832	Roche	20.99	14.8584	17.0787	Mutual
1366	136620001	1833	Roche	24.2846	14.6202	17.7696	Modified
1366	136620001	1834	Roche	34.0048	18.3888	24.0964	Modified
1366	136620001	1835	Roche	35.6202	31.1513	33.7158	Crystalin
1366	136620001	1836	Roche	23.9573	20.3305	20.5106	Intergranular
1366	136620001	1837	Roche	22.8884	16.6846	18.3697	Modified
1366	136620001	1838	Roche	25.0625	20.8198	21.1799	Modified
1366	136620001	1839	Roche	25.5451	11.4976	16.0447	Modified
1366	136620001	184	Roche	22.7066	21.5374	21.5717	Modified			0	0	0	0	0	0	0	0	0	0	0	0	0	0	0	0	0	0	0	0	0
1366	136620001	1840	Roche	20.3387	9.90918	12.7304	Mutual
1366	136620001	1841	Roche	54.3398	34.9504	40.1533	Modified
1366	136620001	1842	Roche	36.6488	20.7377	26.5677	Modified
1366	136620001	1843	Roche	30.2872	29.1594	29.5002	Modified
1366	136620001	1844	Roche	25.1409	16.2075	18.7211	Modified
1366	136620001	1845	Roche	38.9501	20.1977	27.5946	Crystalin
1366	136620001	1846	Roche	39.7947	22.978	29.2384	Modified
1366	136620001	1847	Roche	23.7602	20.7406	22.3999	Reshaped
1366	136620001	1848	Roche	29.9431	23.7692	26.3597	Modified
1366	136620001	1849	Roche	20.6799	20.4932	19.9809	Modified
1366	136620001	185	Roche	18.5255	15.743	17.5525	Reshaped			0	0	0	0	0	0	0	0	0	0	0	0	0	0	0	0	0	0	0	0	0
1366	136620001	1850	Roche	33.3169	22.5666	26.4844	Modified
1366	136620001	1851	Roche	38.9748	18.0928	23.4892	Remobilized
1366	136620001	1852	Roche	25.4209	16.229	19.7174	Intergranular
1366	136620001	1853	Roche	35.3977	27.487	28.7351	Modified
1366	136620001	1854	Roche	13.8112	10.5768	11.624	Crystalin
1366	136620001	1855	Roche	32.3395	20.7084	25.9573	Modified
1366	136620001	1856	Roche	23.7682	23.3064	23.2288	Modified
1366	136620001	1857	Roche	30.0197	27.4031	28.7037	Crystalin
1366	136620001	1858	Roche	24.432	21.2734	22.2953	Modified
1366	136620001	1859	Roche	20.0591	17.0785	18.2649	Modified
1366	136620001	186	Roche	31.3365	25.1699	27.3194	Modified			0	0	0	0	0	0	0	0	0	0	0	0	0	0	0	0	0	0	0	0	0
1366	136620001	1860	Roche	44.0881	15.4712	24.3651	Crystalin
1366	136620001	1861	Roche	16.7914	9.64251	12.2375	Remobilized
1366	136620001	1862	Roche	23.6635	18.5743	21.0319	Mutual
1366	136620001	1863	Roche	42.3443	18.6582	26.0845	Remobilized
1366	136620001	1864	Roche	31.9761	25.2947	27.3795	Modified
1366	136620001	1865	Roche	67.0001	59.2002	49.1789	Crystalin
1366	136620001	1866	Roche	22.5719	16.9768	19.6831	Crystalin
1366	136620001	1867	Roche	45.1882	29.4322	35.8144	Modified
1366	136620001	1868	Roche	19.4985	15.2486	17.1942	Crystalin
1366	136620001	1869	Roche	16.9558	15.5099	15.9746	Mutual
1366	136620001	187	Roche	34.9883	22.2214	27.7514	Modified			0	0	0	0	0	0	0	0	0	0	0	0	0	0	0	0	0	0	0	0	0
1366	136620001	1870	Roche	25.5074	12.6967	16.5697	Intergranular
1366	136620001	1871	Roche	23.8769	18.6221	20.7019	Crystalin
1366	136620001	1872	Roche	36.8363	21.5458	27.0408	Modified
1366	136620001	1873	Roche	21.5098	19.1329	19.5637	Modified
1366	136620001	1874	Roche	38.3233	24.9408	29.9938	Modified
1366	136620001	1875	Roche	46.8363	23.3262	29.6226	Intergranular
1366	136620001	1876	Roche	27.9769	24.3691	24.3106	Modified
1366	136620001	1877	Roche	25.7404	17.875	21.1476	Modified
1366	136620001	1878	Roche	48.107	25.3679	32.8319	Modified
1366	136620001	1879	Roche	42.1312	14.0391	23.0677	Remobilized
1366	136620001	188	Roche	49.7519	23.1083	32.6981	Modified			0	0	0	0	0	0	0	0	0	0	0	0	0	0	0	0	0	0	0	0	0
1366	136620001	1880	Roche	21.6612	18.231	19.8544	Modified
1366	136620001	1881	Roche	18.6706	12.9172	15.737	Mutual
1366	136620001	1882	Roche	41.7549	28.3437	33.9336	Modified
1366	136620001	1883	Roche	41.9916	24.4113	30.3082	Remobilized
1366	136620001	1884	Roche	17.6445	13.8774	15.5772	Mutual
1366	136620001	1885	Roche	15.712	14.9737	15.3435	Modified
1366	136620001	1886	Roche	22.1755	11.9535	16.0902	Modified
1366	136620001	1887	Roche	20.8405	9.87788	13.9947	Intergranular
1366	136620001	1888	Roche	21.7378	12.6469	15.7534	Crystalin
1366	136620001	1889	Roche	22.9771	14.3076	17.8819	Modified
1366	136620001	189	Roche	31.5246	24.6379	26.8139	Modified			0	0	0	0	0	0	0	0	0	0	0	0	0	0	0	0	0	0	0	0	0
1366	136620001	1890	Roche	38.0133	20.0755	27.0617	Crystalin
1366	136620001	1891	Roche	15.305	13.6266	14.5461	Mutual
1366	136620001	1892	Roche	29.1838	17.0456	21.3722	Reshaped
1366	136620001	1893	Roche	23.7033	14.2583	18.4232	Modified
1366	136620001	1894	Roche	30.8806	26.1559	28.0958	Modified
1366	136620001	1895	Roche	28.1328	17.7448	21.3186	Modified
1366	136620001	1896	Roche	34.2465	26.3195	29.4664	Crystalin
1366	136620001	1897	Roche	13.144	11.409	11.9049	Crystalin
1366	136620001	1898	Roche	12.7708	12.6955	12.4363	Mutual
1366	136620001	1899	Roche	41.3319	13.8293	23.5065	Intergranular
1366	136620001	19	Roche	48.5094	22.0167	28.7563	Modified		2020-06-04		0	100	0	0	0	0	0	0	0	0	0	0	0	0	0	0	0	0	0	100
1366	136620001	190	Roche	19.8685	18.6374	19.1403	Pristine	Mutual		0	0	0	0	0	0	0	0	0	0	0	0	0	0	0	0	0	0	0	0	0
1366	136620001	1900	Roche	21.2737	15.6802	16.7119	Intergranular
1366	136620001	1901	Roche	22.4171	11.1776	15.3825	Crystalin
1366	136620001	1902	Roche	22.6829	13.6529	17.1667	Crystalin
1366	136620001	1903	Roche	59.9763	32.4028	41.8528	Modified
1366	136620001	1904	Roche	24.7584	16.575	20.1675	Modified
1366	136620001	1905	Roche	29.3111	27.8653	26.9763	Modified
1366	136620001	1906	Roche	20.7669	12.5662	15.4564	Mutual
1366	136620001	1907	Roche	42.3817	20.8593	27.9176	Modified
1366	136620001	1908	Roche	31.4027	22.5857	25.9476	Modified
1366	136620001	1909	Roche	35.7735	26.2457	29.9868	Modified
1366	136620001	191	Roche	34.178	18.4989	25.1953	Modified			0	0	0	0	0	0	0	0	0	0	0	0	0	0	0	0	0	0	0	0	0
1366	136620001	1910	Roche	20.5783	11.6282	16.01	Crystalin
1366	136620001	1911	Roche	22.8375	20.376	21.5303	Reshaped
1366	136620001	1912	Roche	31.8487	23.4685	26.3586	Modified
1366	136620001	1913	Roche	35.2763	20.0343	24.6648	Modified
1366	136620001	1914	Roche	38.3482	18.4733	24.8547	Intergranular
1366	136620001	1915	Roche	46.5881	25.4982	31.8744	Modified
1366	136620001	1916	Roche	40.3867	27.4646	33.4689	Modified
1366	136620001	1917	Roche	31.535	19.1022	23.3118	Modified
1366	136620001	1918	Roche	22.6224	17.1819	19.9434	Reshaped
1366	136620001	1919	Roche	36.1848	25.5869	29.8344	Modified
1366	136620001	192	Roche	36.396	21.2498	26.0712	Pristine	Intergranular		0	0	0	0	0	0	0	0	0	0	0	0	0	0	0	0	0	0	0	0	0
1366	136620001	1920	Roche	19.1382	13.7267	15.5412	Mutual
1366	136620001	1921	Roche	33.3512	24.6449	27.5673	Crystalin
1366	136620001	1922	Roche	22.3448	16.9558	19.5108	Crystalin
1366	136620001	1923	Roche	36.0855	16.8751	21.6929	Intergranular
1366	136620001	1924	Roche	20.5978	13.9963	16.6878	Mutual
1366	136620001	1925	Roche	31.0296	18.2107	23.5927	Mutual
1366	136620001	1926	Roche	13.9643	11.109	11.7407	Mutual
1366	136620001	1927	Roche	35.8972	17.299	23.7659	Intergranular
1366	136620001	1928	Roche	27.0058	21.5886	22.9108	Modified
1366	136620001	1929	Roche	21.1775	16.7208	18.6059	Crystalin
1366	136620001	193	Roche	36.1625	27.0742	31.2869	Modified			0	0	0	0	0	0	0	0	0	0	0	0	0	0	0	0	0	0	0	0	0
1366	136620001	1930	Roche	14.9429	12.257	13.8251	Crystalin
1366	136620001	1931	Roche	31.8825	22.5443	25.7798	Modified
1366	136620001	1932	Roche	16.8704	13.3435	15.1593	Mutual
1366	136620001	1933	Roche	18.7777	16.0581	17.4088	Reshaped
1366	136620001	1934	Roche	16.2986	9.46368	12.1654	Mutual
1366	136620001	1935	Roche	38.5848	26.5867	30.0738	Remobilized
1366	136620001	1936	Roche	20.1499	16.5618	17.8908	Remobilized
1366	136620001	1937	Roche	42.286	24.4081	30.5594	Modified
1366	136620001	1938	Roche	34.5079	26.5745	30.2112	Modified
1366	136620001	1939	Roche	30.1915	10.5913	16.9341	Intergranular
1366	136620001	194	Roche	25.0634	19.3712	20.8008	Modified			0	0	0	0	0	0	0	0	0	0	0	0	0	0	0	0	0	0	0	0	0
1366	136620001	1940	Roche	20.1059	17.3546	18.5612	Mutual
1366	136620001	1941	Roche	31.8124	17.1517	21.7542	Intergranular
1366	136620001	1942	Roche	25.2303	16.2624	18.6215	Intergranular
1366	136620001	1943	Roche	20.8482	15.453	17.6229	Reshaped
1366	136620001	1944	Roche	35.7609	24.0521	28.3846	Modified
1366	136620001	1945	Roche	35.6202	30.3854	32.7927	Modified
1366	136620001	1946	Roche	37.305	31.3097	34.2045	Modified
1366	136620001	1947	Roche	29.8719	22.8993	24.3795	Crystalin
1366	136620001	1948	Roche	27.9902	18.5987	21.5809	Modified
1366	136620001	1949	Roche	19.8155	13.1045	14.7604	Intergranular
1366	136620001	195	Roche	32.4158	23.2173	25.8231	Pristine	Remobilized		0	0	0	0	0	0	0	0	0	0	0	0	0	0	0	0	0	0	0	0	0
1366	136620001	1950	Roche	17.6556	15.4625	15.6547	Modified
1366	136620001	1951	Roche	38.8407	22.7513	26.7911	Modified
1366	136620001	1952	Roche	23.9699	15.2202	17.8338	Mutual
1366	136620001	1953	Roche	20.2404	13.8952	16.6029	Crystalin
1366	136620001	1954	Roche	37.7826	29.3864	32.6638	Crystalin
1366	136620001	1955	Roche	35.5233	27.0258	30.3791	Crystalin
1366	136620001	1956	Roche	21.4395	18.0482	18.5348	Modified
1366	136620001	1957	Roche	27.785	25.033	25.4559	Modified
1366	136620001	1958	Roche	25.0394	12.475	16.3159	Mutual
1366	136620001	1959	Roche	32.7361	20.4001	25.6285	Crystalin
1366	136620001	196	Roche	37.4661	21.998	27.9754	Modified			0	0	0	0	0	0	0	0	0	0	0	0	0	0	0	0	0	0	0	0	0
1366	136620001	1960	Roche	23.998	15.6595	18.3487	Intergranular
1366	136620001	1961	Roche	28.4096	20.6592	23.6043	Modified
1366	136620001	1962	Roche	27.5255	18.8217	22.0973	Modified
1366	136620001	1963	Roche	16.7921	16.5835	16.4936	Mutual
1366	136620001	1964	Roche	53.7384	20.743	32.4079	Modified
1366	136620001	1965	Roche	31.0328	30.7265	30.0943	Modified
1366	136620001	1966	Roche	26.2256	21.8147	23.917	Crystalin
1366	136620001	1967	Roche	33.0415	27.7119	30.0826	Crystalin
1366	136620001	1968	Roche	39.0811	29.1025	33.0283	Reshaped
1366	136620001	1969	Roche	32.2764	27.6735	29.1129	Modified
1366	136620001	197	Roche	17.9495	12.6529	15.2168	Pristine	Crystalline		0	0	0	0	0	0	0	0	0	0	0	0	0	0	0	0	0	0	0	0	0
1366	136620001	1970	Roche	34.3018	15.4765	20.3112	Modified
1366	136620001	1971	Roche	54.0645	17.6854	28.6561	Remobilized
1366	136620001	1972	Roche	27.8713	19.2422	21.2491	Intergranular
1366	136620001	1973	Roche	30.034	16.7918	20.952	Intergranular
1366	136620001	1974	Roche	29.4676	28.5307	28.4361	Crystalin
1366	136620001	1975	Roche	36.5988	27.6497	31.5535	Reshaped
1366	136620001	1976	Roche	25.1843	15.8119	20.0701	Mutual
1366	136620001	1977	Roche	30.757	22.4924	26.4632	Modified
1366	136620001	1978	Roche	39.3234	21.4516	27.7548	Mutual
1366	136620001	1979	Roche	36.6873	34.5379	33.5814	Modified
1366	136620001	198	Roche	31.4069	24.6714	27.7916	Modified			0	0	0	0	0	0	0	0	0	0	0	0	0	0	0	0	0	0	0	0	0
1366	136620001	1980	Roche	39.8844	22.7172	28.1234	Modified
1366	136620001	1981	Roche	20.9176	12.9771	15.8308	Modified
1366	136620001	1982	Roche	22.8267	9.56447	14.9006	Crystalin
1366	136620001	1983	Roche	21.8619	13.6006	17.0442	Mutual
1366	136620001	1984	Roche	29.253	18.1201	21.981	Modified
1366	136620001	1985	Roche	34.1644	17.3549	22.3162	Intergranular
1366	136620001	1986	Roche	25.033	19.2846	21.8644	Mutual
1366	136620001	1987	Roche	25.4717	18.1695	19.7194	Modified
1366	136620001	1988	Roche	18.5185	14.3758	16.1995	Mutual
1366	136620001	1989	Roche	31.2304	21.2138	24.2613	Modified
1366	136620001	199	Roche	35.5108	24.1696	29.1378	Modified			0	0	0	0	0	0	0	0	0	0	0	0	0	0	0	0	0	0	0	0	0
1366	136620001	1990	Roche	15.117	9.04204	10.8411	Intergranular
1366	136620001	1991	Roche	26.4773	11.8843	14.7839	Intergranular
1366	136620001	1992	Roche	34.4292	28.0215	30.4492	Crystalin
1366	136620001	1993	Roche	65.6706	20.7484	34.5058	Remobilized
1366	136620001	1994	Roche	25.4322	14.0291	15.263	Intergranular
1366	136620001	1995	Roche	36.3877	31.9463	32.7015	Modified
1366	136620001	1996	Roche	30.9009	20.3643	22.7719	Crystalin
1366	136620001	1997	Roche	33.314	21.946	26.7387	Modified
1366	136620001	1998	Roche	47.4053	28.7858	34.3265	Intergranular
1366	136620001	1999	Roche	32.8768	24.753	27.7165	Modified
1366	136620001	2	Roche	36.505	27.0385	32.2071	Modified		2020-06-04		0	100	0	0	0	0	0	0	0	0	0	0	0	0	0	0	0	0	0	100
1366	136620001	20	Roche	19.9495	19.2507	19.1736	Modified		2020-06-04		0	91.9404	0	0	0	0	0	0	0	8.05956	0	0	0	0	0	0	0	0	0	100
1366	136620001	200	Roche	38.448	26.9526	30.3029	Pristine	Remobilized		0	0	0	0	0	0	0	0	0	0	0	0	0	0	0	0	0	0	0	0	0
1366	136620001	2000	Roche	29.0214	21.3362	24.1697	Reshaped
1366	136620001	2001	Roche	11.7107	8.64362	9.7041	Mutual
1366	136620001	2002	Roche	38.9725	28.4882	30.0796	Intergranular
1366	136620001	2003	Roche	48.4192	18.2212	28.7142	Intergranular
1366	136620001	2004	Roche	32.2312	27.0219	27.9573	Modified
1366	136620001	2005	Roche	20.6235	16.9061	18.4032	Modified
1366	136620001	2006	Roche	27.8913	24.3082	24.2268	Modified
1366	136620001	2007	Roche	39.604	24.7252	27.6593	Modified
1366	136620001	2008	Roche	16.7296	13.9413	14.7906	Mutual
1366	136620001	2009	Roche	32.8717	13.9582	18.7748	Intergranular
1366	136620001	201	Roche	39.3328	25.907	30.4781	Modified			0	0	0	0	0	0	0	0	0	0	0	0	0	0	0	0	0	0	0	0	0
1366	136620001	2010	Roche	14.3529	11.7185	12.8272	Modified
1366	136620001	2011	Roche	53.8916	29.1844	36.233	Modified
1366	136620001	2012	Roche	50.9122	23.0268	29.0607	Modified
1366	136620001	2013	Roche	44.2337	28.8268	35.317	Modified
1366	136620001	2014	Roche	30.2232	23.3058	25.9717	Reshaped
1366	136620001	2015	Roche	21.7449	21.3296	20.7984	Mutual
1366	136620001	2016	Roche	41.7652	34.1606	36.3064	Modified
1366	136620001	2017	Roche	25.2998	21.6438	22.8291	Reshaped
1366	136620001	2018	Roche	32.1112	20.3283	23.5805	Modified
1366	136620001	2019	Roche	44.6916	29.1997	33.3342	Remobilized
1366	136620001	202	Roche	18.3594	15.9389	17.0381	Pristine	Mutual		0	0	0	0	0	0	0	0	0	0	0	0	0	0	0	0	0	0	0	0	0
1366	136620001	2020	Roche	17.9569	17.6722	17.2663	Modified
1366	136620001	2021	Roche	38.0368	31.387	33.4632	Crystalin
1366	136620001	2022	Roche	21.9659	19.387	20.5903	Modified
1366	136620001	2023	Roche	31.117	30.3549	29.3077	Modified
1366	136620001	2024	Roche	43.6567	34.4727	36.3627	Modified
1366	136620001	2025	Roche	35.0221	24.1328	29.2365	Modified
1366	136620001	2026	Roche	15.7951	11.6489	13.6429	Mutual
1366	136620001	2027	Roche	25.3691	21.4189	23.6676	Crystalin
1366	136620001	2028	Roche	27.0246	20.0415	21.7491	Crystalin
1366	136620001	2029	Roche	17.9645	17.0992	17.6126	Mutual
1366	136620001	203	Roche	15.5247	12.5959	13.7461	Pristine	Mutual		0	0	0	0	0	0	0	0	0	0	0	0	0	0	0	0	0	0	0	0	0
1366	136620001	2030	Roche	20.0534	14.9724	17.0909	Mutual
1366	136620001	2031	Roche	41.8341	15.6462	23.9921	Intergranular
1366	136620001	2032	Roche	25.6694	16.4947	19.6671	Modified
1366	136620001	2033	Roche	17.1932	14.3189	14.8928	Mutual
1366	136620001	2034	Roche	19.6854	16.2929	17.2485	Crystalin
1366	136620001	2035	Roche	28.917	24.7504	26.8625	Modified
1366	136620001	2036	Roche	27.712	21.4869	21.7486	Modified
1366	136620001	2037	Roche	25.6695	23.6051	23.7254	Modified
1366	136620001	2038	Roche	33.1854	11.6711	17.2306	Intergranular
1366	136620001	2039	Roche	22.4996	17.8219	19.988	Modified
1366	136620001	204	Roche	42.413	14.7655	24.0086	Modified			0	0	0	0	0	0	0	0	0	0	0	0	0	0	0	0	0	0	0	0	0
1366	136620001	2040	Roche	48.6352	28.11	34.6573	Modified
1366	136620001	2041	Roche	20.6398	18.3247	19.7637	Reshaped
1366	136620001	2042	Roche	13.892	7.27038	9.57689	Mutual
1366	136620001	2043	Roche	23.5654	16.5072	18.9735	Modified
[truncated: 98,934 more rows]
